# Supplementary material for: A novel gene ZNF862 causes hereditary gingival fibromatosis
Source: eLife. 2022 Feb 10;11:e66646. doi: 10.7554/eLife.66646 (PMC8856651; doi:10.7554/eLife.66646)
Supplement: Supplementary file 1. [file elife-66646-supp1.xlsx]

## Sheet: Sheet1
Table S1. The genes expression profiling and changes in patients over controls based on RNA sequencing.
Genes	Accession number	log2 FC	log2 CPM	P value	FDR
NBPF10	NM_001039703.6	-12.8066	5.15378	7.6591e-19	2.94623e-14
RPS27A	NM_002954.5	3.51068	6.90038	1.88617e-17	3.62776e-13
SCRN1	NM_001145514.1	-11.7392	4.09254	2.91e-15	3.7313e-11
RPL15	NM_002948.4	3.05264	9.05333	7.62627e-15	7.33399e-11
LGALS8	NM_201544.3	-11.7012	4.05489	2.237e-13	1.61417e-09
EGR1	NM_001964.3	3.32323	7.08855	2.51775e-13	1.61417e-09
JAK1	NM_001321856.1	-11.4922	3.8477	4.05472e-13	2.22818e-09
PLD3	NM_001291311.1	-11.6047	3.95907	1.61506e-12	7.76581e-09
PAM	NM_000919.3	-12.3258	4.67522	2.42435e-11	1.03619e-07
TRIP12	NM_001284214.2	-6.77265	3.9286	8.07164e-11	3.10492e-07
UBL5	NM_001048241.3	2.6974	5.97869	8.89074e-11	3.10909e-07
GIGYF2	NM_015575.4	-11.1536	3.51278	1.30924e-10	4.19689e-07
SMARCA4	NM_001128846.1	-11.262	3.61983	2.54918e-10	7.54303e-07
PEX2	NM_000318.3	-10.9033	3.26596	2.98384e-10	8.19852e-07
ANKRD12	NM_015208.5	-10.9729	3.33457	4.14788e-10	1.06371e-06
PPP1R14A	NM_033256.3	5.59787	3.17087	4.79554e-10	1.15294e-06
SSH2	NM_033389.3	-10.9782	3.33978	6.87128e-10	1.55481e-06
TBC1D5	NM_001349080.1	-10.8813	3.24423	1.35147e-09	2.88816e-06
GSE1	NM_001278184.3	-10.8542	3.2175	1.43886e-09	2.91309e-06
RPL10	NM_006013.4	2.38376	6.85149	1.98187e-09	3.81183e-06
MAMDC2	NM_153267.5	2.95461	5.43249	2.83291e-09	5.03899e-06
HDGF	NM_001319187.1	-10.8528	3.21605	2.8819e-09	5.03899e-06
GOLGA8A	NM_001368071.2	-10.9287	3.29101	3.48013e-09	5.59483e-06
ACTA2	NM_001613.4	3.24632	9.3454	3.49068e-09	5.59483e-06
UBA52	NM_003333.5	2.26858	7.47449	3.72719e-09	5.64877e-06
FHL1	NM_001167819.1	-10.918	3.28045	3.83265e-09	5.64877e-06
SLX1A	NM_001014999.2	-10.9836	3.34498	3.96488e-09	5.64877e-06
GOLGB1	NM_001366282.2	-10.6175	2.9847	5.04454e-09	6.9303e-06
SLC20A2	NM_006749.5	2.99448	5.80439	5.40482e-09	7.16921e-06
PTGDS	NM_000954.6	3.20198	5.17772	8.15647e-09	1.04585e-05
SELENOW	NM_003009.4	2.64648	6.61056	9.13818e-09	1.13393e-05
LIMA1	NM_001243775.1	-4.44618	4.43903	1.17304e-08	1.41011e-05
SYNE2	NM_182914.2	-10.82	3.18387	1.61927e-08	1.88753e-05
TAGLN	NM_003186.5	2.6304	11.2329	4.98904e-08	5.62645e-05
NFAT5	NM_138714.4	-11.2878	3.6455	5.11934e-08	5.62645e-05
RPS17	NM_001021.6	2.05079	9.01207	6.83509e-08	7.30348e-05
RPL35	NM_007209.4	2.05834	9.12423	7.08297e-08	7.3638e-05
RPL11	NM_000975.5	2.09333	7.02574	7.39848e-08	7.38103e-05
LGALS1	NM_002305.4	2.03419	11.6488	7.4833e-08	7.38103e-05
MYL9	NM_181526.3	2.41405	5.8709	8.5159e-08	8.18953e-05
COPS9	NM_001163424.2	2.31966	5.33024	9.54397e-08	8.6581e-05
ACOT1	NM_001037161.2	2.92228	4.23046	9.66991e-08	8.6581e-05
VPS13A	NM_001018037.2	-10.3604	2.73248	9.67838e-08	8.6581e-05
MMP3	NM_002422.5	-4.36727	7.69894	1.2792e-07	0.000111834
ATP5MF	NM_001003713.3	2.22148	5.80623	1.43418e-07	0.000122597
HINT1	NM_005340.7	2.10561	7.17064	1.76275e-07	0.000147408
TPST2	NM_003595.5	2.27842	6.60208	1.83411e-07	0.000148441
RPL10	NM_001303625.1	7.04902	2.31592	1.85228e-07	0.000148441
UQCRQ	NM_014402.5	2.1334	6.74115	2.1703e-07	0.000170377
CDK6	NM_001259.8	-10.2453	2.61992	2.88436e-07	0.000221906
MYL6	NM_021019.5	2.03713	10.1822	3.00437e-07	0.000226606
IGFBP7	NM_001253835.1	1.96245	8.29844	3.10467e-07	0.000229668
TGFBR3	NM_001195683.2	-10.9053	3.26786	3.18692e-07	0.000231304
S100A13	NM_001024211.1	2.20057	6.45055	3.33206e-07	0.00023736
WTAP	NM_004906.5	-10.2194	2.59462	3.62975e-07	0.000253865
XRCC3	NM_001371229.1	9.74107	1.14512	5.0352e-07	0.000345873
UQCR11	NM_006830.4	2.03239	6.58493	5.22481e-07	0.000352601
SPATA13	NM_153023.4	-10.2569	2.63127	5.62209e-07	0.00037287
NQO1	NM_000903.3	2.00274	9.58835	5.94723e-07	0.00038775
ZDBF2	NM_001285549.2	-10.1756	2.55189	6.11934e-07	0.000392321
ICE2	NM_001018089.3	-10.2327	2.60764	6.33402e-07	0.000399427
CDKN1A	NM_000389.5	1.96457	10.0519	6.63168e-07	0.000411453
TXNIP	NM_006472.6	-3.35142	5.52124	6.87981e-07	0.000420072
ATP6V0B	NM_004047.5	2.0726	6.24359	7.1988e-07	0.000429593
NOTCH2NLB	NM_001364007.2	5.85901	3.16456	7.25909e-07	0.000429593
UBP1	NM_001128161.1	-10.0418	2.42128	9.30189e-07	0.000542145
TRPS1	NM_014112.5	-10.9216	3.28396	9.87931e-07	0.000567205
RPS15A	NM_001030009.2	1.9761	8.31045	1.14235e-06	0.000642705
ULK3	NM_001099436.4	-10.1239	2.5014	1.1588e-06	0.000642705
OST4	NM_001134693.2	1.89151	7.24358	1.16956e-06	0.000642705
PHPT1	NM_014172.6	1.9665	6.52747	1.34091e-06	0.000726489
NDUFB2	NM_004546.3	2.04323	6.18602	1.37927e-06	0.000736892
FTL	NM_000146.4	1.87527	12.7071	1.96546e-06	0.00103569
PAM	NM_138821.2	9.85768	1.21058	2.27556e-06	0.00118289
ZNF587	NM_001204817.2	-10.2065	2.58198	2.38253e-06	0.00121656
SYNCRIP	NM_001159677.2	-6.26179	3.35659	2.40358e-06	0.00121656
YIF1B	NM_001039673.3	2.10398	5.21811	2.58232e-06	0.00129005
NFKB1	NM_001319226.2	-10.0022	2.38276	2.861e-06	0.00141095
ARPC4	NM_005718.4	2.03316	5.82426	3.11237e-06	0.00151549
JMJD1C	NM_001318154.2	-10.2983	2.67175	3.18431e-06	0.00153114
ANKRD28	NM_001349283.2	-10.0042	2.38476	3.62019e-06	0.00171923
CHD9	NM_001352156.2	-9.98553	2.36659	3.93042e-06	0.00182594
PPFIBP2	NM_001256568.1	7.48504	1.03035	3.98467e-06	0.00182594
RPL18A	NM_000980.4	1.74528	9.69181	3.98729e-06	0.00182594
NDUFA13	NM_015965.7	1.86974	7.04422	4.22576e-06	0.00191238
ROMO1	NM_080748.3	2.03393	5.30048	4.41148e-06	0.00193541
SDF2L1	NM_022044.3	2.1652	5.26798	4.41491e-06	0.00193541
SULT1A4	NM_001017390.2	9.29128	0.700521	4.53476e-06	0.00193541
IQCE	NM_001287501.1	-10.1253	2.50278	4.54236e-06	0.00193541
PAM	NM_001364591.2	9.32623	0.715038	4.56178e-06	0.00193541
SFRP1	NM_003012.5	-2.88527	6.13376	4.60017e-06	0.00193541
IGFBP7	NM_001553.3	1.75064	9.67958	4.62884e-06	0.00193541
RRAS	NM_006270.5	1.8466	7.12291	4.96228e-06	0.00200714
SELENOH	NM_001321335.1	3.06008	3.3328	4.98294e-06	0.00200714
IL34	NM_152456.2	7.40099	0.984045	5.00593e-06	0.00200714
SELENOM	NM_080430.4	1.93786	8.10268	5.00912e-06	0.00200714
RPS5	NM_001009.4	1.7124	9.35303	5.1563e-06	0.00204482
GUK1	NM_001159390.1	1.80233	7.41857	5.25878e-06	0.00206418
RPL39	NM_001000.4	1.77831	8.07568	5.3702e-06	0.00208614
RNH1	NM_002939.4	-3.18663	4.84007	5.42319e-06	0.00208614
COX7A1	NM_001864.4	2.61787	4.10337	5.66815e-06	0.00214389
ARHGAP19	NM_032900.6	-10.1772	2.55334	5.72615e-06	0.00214389
PAM	NM_138766.2	-10.5345	2.90315	5.74268e-06	0.00214389
DHX57	NM_001329963.1	9.28653	0.677092	5.79626e-06	0.00214389
CPEB4	NM_030627.4	-9.77829	2.16524	5.9184e-06	0.00216822
RPS10	NM_001014.5	1.74617	9.33138	5.97918e-06	0.00216982
SSR4	NM_006280.3	1.77172	7.01424	6.03625e-06	0.00217006
RPL37A	NM_000998.5	1.72692	9.2596	6.25995e-06	0.00222965
DYRK1A	NM_001396.4	-9.80833	2.1944	6.39969e-06	0.0022585
MTMR1	NM_001306144.3	-9.93098	2.31351	6.87617e-06	0.0024046
TAB2	NM_015093.5	-10.0202	2.40025	7.01058e-06	0.00242951
PFDN5	NM_002624.4	1.76729	7.43896	7.62217e-06	0.00261788
OGA	NM_001142434.1	-9.7427	2.13077	8.71908e-06	0.00296811
TBC1D14	NM_001286805.1	10.5209	1.86433	8.82121e-06	0.00297654
SULT1A3	NM_177552.3	-9.68639	2.07627	9.39261e-06	0.0031411
USP53	NM_001371395.1	-10.0691	2.44796	9.47221e-06	0.0031411
RPL6	NM_001320142.1	-3.13842	4.09093	1.08917e-05	0.00358096
PRKAR1A	NM_001276289.1	-9.83363	2.2189	1.12918e-05	0.00368104
EVA1B	NM_001304762.2	1.71731	7.96024	1.16565e-05	0.00376798
GPX4	NM_001367832.1	1.79408	8.19999	1.19418e-05	0.00382805
RPL28	NM_001363697.1	1.64485	7.8646	1.33986e-05	0.00422359
NDUFA4	NM_002489.4	1.82844	7.23165	1.3413e-05	0.00422359
RPS21	NM_001024.4	1.66824	7.4282	1.35051e-05	0.00422359
COX7A2	NM_001366293.1	1.81599	6.29836	1.37006e-05	0.00425017
CCN4	NM_003882.4	-2.78408	5.55372	1.4294e-05	0.00435582
ADGRL1	NM_014921.5	-10.0577	2.4368	1.43209e-05	0.00435582
NDUFB7	NM_004146.6	1.78759	6.23115	1.43809e-05	0.00435582
COX6B1	NM_001863.5	1.72753	6.41971	1.4758e-05	0.00439279
STAG2	NM_001042751.2	-9.94126	2.32346	1.47696e-05	0.00439279
SNX14	NM_001297614.2	9.1752	0.612802	1.48455e-05	0.00439279
ELOB	NM_007108.4	1.8153	6.27377	1.52094e-05	0.00446609
GRAMD1B	NM_001330396.2	-10.4094	2.78055	1.63153e-05	0.004726
RPS18	NM_022551.3	1.65286	9.97514	1.63402e-05	0.004726
RPL32	NM_000994.4	1.64571	9.06087	1.64964e-05	0.00473557
PHACTR1	NM_001322314.2	-10.1827	2.55877	1.66638e-05	0.00474821
COX14	NM_032901.4	2.13228	4.57965	1.73471e-05	0.00490654
KAT6B	NM_001370138.1	-9.9247	2.30738	1.77475e-05	0.0049479
ATP6V0E1	NM_003945.4	1.66575	7.64112	1.77505e-05	0.0049479
BAD	NM_032989.3	1.78836	6.06933	1.8112e-05	0.00498104
DEF8	NM_001242821.1	2.00999	4.803	1.81284e-05	0.00498104
NDUFA11	NM_175614.5	1.71765	6.89081	1.8752e-05	0.00511585
RNF181	NM_016494.4	1.85738	5.62824	1.89008e-05	0.00512013
RPL30	NM_000989.4	1.62797	8.70479	1.96037e-05	0.00524822
RPS14	NM_005617.4	1.64753	9.48955	1.96466e-05	0.00524822
LAMTOR4	NM_001008395.4	1.81256	5.99048	2.0018e-05	0.00531057
CACNA2D1	NM_000722.4	-3.1751	4.96875	2.03791e-05	0.00536933
AKR1A1	NM_001202413.1	1.96491	5.02682	2.12976e-05	0.00557315
FIS1	NM_016068.3	1.74416	6.52397	2.16448e-05	0.00562525
MICOS13	NM_205767.2	1.85032	5.48228	2.17891e-05	0.00562525
DLG1	NM_001363865.1	-9.60887	2.00132	2.20692e-05	0.00565958
NDUFA2	NM_002488.4	1.87969	5.18077	2.23969e-05	0.00567109
RPL27	NM_000988.5	1.6053	8.96065	2.2409e-05	0.00567109
NRP1	NM_001024629.2	-9.83298	2.21829	2.29458e-05	0.005769
RAB5B	NM_001252037.1	6.48941	1.54421	2.36624e-05	0.00588784
THSD4	NM_024817.2	-2.29232	6.38626	2.37246e-05	0.00588784
NME2	NM_002512.4	1.63345	8.94912	2.43253e-05	0.00599438
TRAPPC5	NM_001042462.2	1.80049	6.04564	2.44656e-05	0.00599438
IER2	NM_004907.3	1.80489	6.32226	2.61036e-05	0.00635523
RPLP1	NM_001003.3	1.60225	10.1777	2.6345e-05	0.00637366
DAD1	NM_001344.4	1.65756	7.27413	2.66492e-05	0.00640697
CIRBP	NM_001300829.2	-2.37725	5.13797	2.69794e-05	0.00644606
ATP5ME	NM_007100.4	2.07463	4.58216	2.76371e-05	0.00655042
MGAT5	NM_002410.5	10.1916	1.53583	2.77567e-05	0.00655042
MRPL41	NM_032477.3	1.75072	6.01956	2.98432e-05	0.00695134
COX5B	NM_001862.3	1.74117	6.48523	2.98609e-05	0.00695134
CD151	NM_004357.5	1.6049	8.54909	2.99977e-05	0.00695134
RPS16	NM_001020.6	1.59864	9.24586	3.06024e-05	0.00704899
NDUFAF8	NM_001086521.2	1.98123	5.35971	3.17164e-05	0.00726212
MZT2B	NM_025029.5	1.63034	7.23665	3.34285e-05	0.00760885
MXRA5	NM_015419.4	-3.61125	8.05296	3.44792e-05	0.00777232
HPS5	NM_181508.1	-9.6828	2.07279	3.45508e-05	0.00777232
UXT	NM_004182.3	1.88933	5.04701	3.53943e-05	0.00791577
RBPJ	NM_015874.4	-2.33632	5.05359	3.58991e-05	0.00793763
LAMTOR5	NM_006402.2	1.6973	6.21028	3.59047e-05	0.00793763
ADGRL2	NM_012302.4	-11.7095	4.06308	3.69351e-05	0.00809964
NABP1	NM_001254736.2	-2.57293	4.57094	3.70587e-05	0.00809964
POLR2L	NM_021128.5	1.62902	7.68003	3.7629e-05	0.00816455
GSTP1	NM_000852.4	1.58325	8.65238	3.77802e-05	0.00816455
RHOC	NM_001042678.1	1.67244	8.14625	3.84162e-05	0.00822687
ATP5MD	NM_001206426.2	1.86293	5.51761	3.84963e-05	0.00822687
RPS9	NM_001013.4	1.57914	9.54917	3.94399e-05	0.00838197
SF3B5	NM_031287.3	1.65233	6.26597	4.03084e-05	0.00851845
JMJD1C	NM_001282948.1	-9.52751	1.92283	4.0525e-05	0.00851845
EHBP1	NM_001354219.2	-9.67429	2.06455	4.13449e-05	0.0086375
SPATA13	NM_001286792.2	-10.0134	2.39364	4.15405e-05	0.0086375
FAU	NM_001997.5	1.56283	8.02996	4.22705e-05	0.00874204
TIMM8B	NM_012459.4	1.98504	5.11635	4.28105e-05	0.00880637
EHBP1	NM_001354218.1	10.0504	1.39514	4.4081e-05	0.00901949
NKTR	NM_005385.4	-2.75105	4.20191	4.44617e-05	0.00904926
S100A16	NM_080388.3	1.99862	7.63354	4.47843e-05	0.00905649
TMEM258	NM_014206.4	1.8043	5.3776	4.50759e-05	0.00905649
ERCC1	NM_001369411.1	3.99756	2.01256	4.52036e-05	0.00905649
CALD1	NM_033140.4	-3.55848	6.85286	4.63814e-05	0.00924431
LIMS2	NM_001161403.2	2.05643	5.14017	4.73037e-05	0.00937955
RPL10	NM_001303624.2	1.58766	10.4676	4.86512e-05	0.00959726
ASXL2	NM_001369346.1	10.0128	1.35773	4.9983e-05	0.00980968
FTO	NM_001363894.1	-9.61827	2.01041	5.29384e-05	0.010337
TRAF4	NM_004295.4	1.7143	5.75889	5.32259e-05	0.0103406
MSRB1	NM_016332.3	1.89298	5.75329	5.40774e-05	0.0104532
SNRPD2	NM_004597.6	1.5888	6.80627	5.46315e-05	0.0105076
TP53INP2	NM_021202.3	2.80638	3.82258	5.67899e-05	0.0108683
RHOD	NM_014578.4	2.1081	4.82954	5.84427e-05	0.0111293
MRPL14	NM_032111.4	1.80044	5.34871	6.1263e-05	0.0116089
CEP162	NM_014895.4	-9.48296	1.87993	6.39844e-05	0.0120651
PTPN13	NM_080683.3	-2.34888	4.85642	6.47151e-05	0.0121059
ERAP2	NM_022350.5	-5.49242	5.14259	6.48298e-05	0.0121059
UBN1	NM_001288656.1	-9.45147	1.84962	6.52736e-05	0.0121299
MYL6	NM_079423.4	1.75951	8.65838	6.57958e-05	0.0121681
CNN1	NM_001299.6	3.04693	6.04933	6.76107e-05	0.0124439
MMP1	NM_002421.4	-2.53608	9.63054	6.80934e-05	0.0124731
ZNF219	NM_001102454.1	-9.47248	1.86983	6.87533e-05	0.0125343
EFHD1	NM_025202.4	3.85877	2.69089	6.94359e-05	0.012599
SERF2	NM_001018108.4	1.5728	9.18006	7.03253e-05	0.0127005
NR3C1	NM_001364181.2	-9.95828	2.33997	7.1e-05	0.0127624
ANXA6	NM_001363114.2	1.54655	7.5545	7.2153e-05	0.0128941
ATP5MG	NM_006476.5	1.5657	6.73103	7.24031e-05	0.0128941
RPL35A	NM_000996.4	1.52362	8.17903	7.38606e-05	0.0130931
BLOC1S6	NM_001311255.1	-9.39892	1.79909	7.47237e-05	0.0131853
LIFR	NM_001127671.2	-4.37019	3.50768	7.54238e-05	0.0132481
RPS19BP1	NM_194326.4	1.64576	6.16601	7.58578e-05	0.0132637
RPL36	NM_033643.3	1.53393	8.10096	7.8153e-05	0.0135196
CACNA1C	NM_001129842.1	9.87311	1.21863	7.83343e-05	0.0135196
RPL41	NM_021104.2	1.51072	9.84022	7.85511e-05	0.0135196
POLE4	NM_019896.4	1.73675	5.34904	7.87267e-05	0.0135196
MEIS3	NM_001346148.1	-9.44798	1.84626	7.93159e-05	0.0135602
RNH1	NM_203384.2	1.81339	4.98296	8.30398e-05	0.014134
RPL9	NM_000661.4	1.50408	9.45706	8.54268e-05	0.0144763
NUP98	NM_001365125.2	-9.64472	2.036	8.62801e-05	0.0145567
ENPP2	NM_001040092.3	-3.07922	5.9852	8.68279e-05	0.0145852
MICU1	NM_001363513.1	9.48606	0.922451	8.77266e-05	0.0146721
C19orf53	NM_014047.3	1.61569	6.37276	8.9133e-05	0.0148428
NDUFA3	NM_004542.4	2.02102	4.5364	9.13024e-05	0.0151385
MTMR1	NM_001353996.1	9.47039	0.907797	9.24438e-05	0.0151998
MVD	NM_002461.3	1.79614	6.42971	9.24623e-05	0.0151998
ARHGAP21	NM_001367451.1	-2.18869	5.97846	9.2891e-05	0.0152053
NEDD8	NM_006156.3	1.54962	6.61242	9.51065e-05	0.015502
INSIG1	NM_198337.3	8.70671	0.13803	0.000100327	0.0162838
SIX1	NM_005982.4	-2.10553	5.75029	0.000101647	0.0164288
FDPS	NM_001242824.2	1.91235	6.44152	0.000103389	0.0165896
KCNJ2	NM_000891.3	-6.55243	2.47642	0.000103908	0.0165896
CRYAB	NM_001289807.1	2.40018	3.78578	0.000103936	0.0165896
SERF2	NM_001199877.2	2.57158	3.31982	0.000104587	0.0166245
AP1S1	NM_001283.5	1.53456	6.82357	0.000106706	0.0168724
MRPL54	NM_172251.3	1.85195	4.67336	0.000107023	0.0168724
TOMM7	NM_019059.4	1.66454	6.25329	0.000108677	0.0170632
CASP9	NM_032996.3	9.01765	0.384021	0.000111715	0.0174688
TSC2	NM_001318832.1	9.76435	1.11044	0.000112631	0.0175408
NXPE3	NM_001134456.2	-5.02176	2.36588	0.00011344	0.0175456
PTGFR	NM_000959.4	-2.6031	6.22338	0.000113574	0.0175456
CCN4	NM_080838.3	-5.3169	2.82941	0.000114262	0.0175813
ZNF532	NM_001318726.2	-9.44512	1.84353	0.000116576	0.0178658
NNMT	NM_006169.3	1.6948	7.33047	0.000117314	0.0179076
BIRC2	NM_001256163.1	-9.31518	1.71874	0.000121293	0.0184418
NDUFS5	NM_001184979.1	1.99594	6.82699	0.000125231	0.0189655
RCBTB1	NM_001352500.2	-9.29378	1.69825	0.000127504	0.0192342
ATP5MF	NM_004889.4	1.75766	5.33716	0.000130887	0.0196261
CD151	NM_139030.3	1.61121	7.80531	0.000131417	0.0196261
ATF7IP	NM_001286514.2	-9.25201	1.65825	0.000131819	0.0196261
RPS19	NM_001022.4	1.46187	9.80198	0.000132144	0.0196261
NME4	NM_005009.3	1.52296	7.11751	0.000134696	0.0199283
PDGFRA	NM_001347828.2	-2.80877	4.38198	0.000136177	0.0200702
PKM	NM_001206797.2	1.81039	4.77007	0.000137162	0.0201381
HSPB7	NM_014424.4	3.85152	4.20325	0.000138343	0.0202344
CTBP2	NM_001321012.2	-9.35885	1.76061	0.000139267	0.0202772
RPL38	NM_001035258.2	2.30906	3.69682	0.00013969	0.0202772
NAA38	NM_001320925.2	1.81661	4.61333	0.000142878	0.020662
TSPO	NM_000714.6	1.47387	8.8232	0.000145703	0.0209916
PRRX1	NM_006902.5	-2.03907	8.29399	0.00014757	0.0211355
EDNRB	NM_001122659.3	-9.6576	2.04835	0.000147959	0.0211355
ATRX	NM_000489.5	-2.58247	5.5809	0.00014835	0.0211355
STARD10	NM_006645.2	2.22092	4.11914	0.00014921	0.0211789
RPS3	NM_001256802.2	1.48516	9.52009	0.000149756	0.0211789
TRMT112	NM_016404.3	1.59768	6.30224	0.0001508	0.0212032
PLPP3	NM_003713.5	-3.48762	8.37002	0.00015103	0.0212032
RPS27	NM_001030.6	1.50026	8.96566	0.000152454	0.0212278
EEF1D	NM_001289950.3	1.66126	5.46228	0.000152777	0.0212278
ENPP2	NM_006209.5	-4.17397	6.16574	0.000152861	0.0212278
BOD1L1	NM_148894.3	-2.0363	5.41913	0.000154565	0.0213873
PDGFD	NM_025208.5	-5.74643	4.85683	0.000156706	0.0216057
RPS12	NM_001016.4	1.45381	9.17638	0.000159524	0.0219157
ATP6V1F	NM_004231.4	1.55065	6.27658	0.000161219	0.0220698
PPIP5K1	NM_014659.5	-5.32007	2.14302	0.000163471	0.0222988
SLC12A8	NM_024628.5	9.27671	0.72757	0.000169477	0.0230363
CCDC66	NM_001141947.3	-9.23821	1.64503	0.000171625	0.0231883
NFIX	NM_001365983.2	-10.6911	3.05694	0.00017225	0.0231883
COX6A1	NM_004373.4	1.50177	6.96372	0.000172404	0.0231883
CISD3	NM_001136498.2	1.62663	5.84596	0.000182043	0.0243995
EIF2B4	NM_172195.3	8.66644	0.0662726	0.000184111	0.0244958
PDE5A	NM_033430.3	-2.80362	5.02955	0.00018416	0.0244958
RPL17	NM_001369561.1	8.59837	0.0169025	0.000184672	0.0244958
SELENOH	NM_170746.4	1.61328	6.05531	0.000186711	0.02466
ANKRD28	NM_001195098.1	-10.4617	2.83174	0.000187192	0.02466
GSTT1	NM_000853.3	-10.4737	2.84342	0.000187985	0.0246799
PHACTR4	NM_001350158.2	-9.4036	1.80358	0.000190125	0.024876
MYH11	NM_002474.3	4.31288	2.49596	0.000192587	0.0251127
DKK3	NM_001018057.1	2.2598	6.65473	0.000194046	0.0251847
ZNHIT1	NM_006349.3	1.4834	6.44734	0.000194449	0.0251847
CAVIN3	NM_145040.3	1.48668	8.23704	0.000199689	0.0257177
PUM2	NM_001352919.2	9.57121	0.918663	0.000200456	0.0257177
RPL38	NM_000999.4	1.43413	7.12562	0.00020057	0.0257177
WFDC1	NM_021197.4	3.44655	3.34172	0.000203718	0.0260346
DBNDD2	NM_001048223.2	1.8342	4.54292	0.000205241	0.0261424
RPLP0	NM_001002.4	1.40567	11.013	0.00020928	0.0265689
MYL9	NM_006097.5	1.58212	10.3537	0.000213965	0.0270743
RPL8	NM_000973.5	1.38905	10.0276	0.000217095	0.0273804
ADAM12	NM_001288974.2	-9.20554	1.6138	0.000218882	0.0275155
MLST8	NM_001352059.2	-9.28377	1.68868	0.000220039	0.0275708
GUK1	NM_001242840.2	1.9952	4.51566	0.000221302	0.027639
KRTAP1-5	NM_031957.2	2.3922	6.21418	0.00022232	0.0276764
LBH	NM_030915.4	2.5874	4.70855	0.000226816	0.0280599
FLOT1	NM_001318875.1	2.07259	3.93066	0.000227492	0.0280599
RREB1	NM_001168344.2	-10.3423	2.71473	0.000228718	0.0280599
GUK1	NM_000858.6	1.90252	4.4732	0.000228987	0.0280599
TBL1XR1	NM_001321195.2	-9.62895	2.02073	0.000229049	0.0280599
NOP10	NM_018648.3	1.62501	5.83622	0.000237006	0.0288921
ZNF436	NM_001077195.2	-9.23572	1.64262	0.000237343	0.0288921
HSPB1	NM_001540.5	1.44207	8.74488	0.000239601	0.0290748
FAM20B	NM_001324310.1	-10.7439	3.10877	0.000248031	0.0300031
ADAP1	NM_006869.4	3.59239	2.35124	0.0002492	0.0300501
GPX1	NM_000581.4	1.44118	8.91227	0.000251289	0.0302073
SLC8A1	NM_001112802.2	9.49159	0.839704	0.000254403	0.0304863
CIB1	NM_006384.4	1.50558	6.20266	0.000258443	0.0308744
TINAGL1	NM_022164.3	3.42006	3.09965	0.000261796	0.0311252
RHOC	NM_175744.4	1.52027	7.60939	0.000262162	0.0311252
NANS	NM_018946.4	1.53305	6.13132	0.00026522	0.0313915
G0S2	NM_015714.4	3.74581	4.34644	0.000270042	0.031745
S100A4	NM_019554.3	1.58796	7.36362	0.000270442	0.031745
MN1	NM_002430.3	-2.95269	5.00359	0.000270766	0.031745
KTN1	NM_001271014.2	-2.61912	4.0807	0.000271508	0.031745
ADAMTS7	NM_014272.5	1.58385	6.97503	0.000272507	0.0317652
FADS3	NM_021727.5	1.6559	7.03219	0.000273787	0.031818
COX4I1	NM_001861.6	1.39	7.87003	0.000280716	0.0324834
DPM3	NM_153741.2	1.94985	4.17184	0.000281202	0.0324834
UBTD1	NM_024954.5	1.56187	6.05901	0.000286791	0.0329677
CDH13	NM_001220488.2	-9.41249	1.81205	0.000287108	0.0329677
PISD	NM_001326417.2	-9.17629	1.58592	0.000288376	0.0330148
VEZT	NM_001352110.1	-9.08793	1.50164	0.00029767	0.0339777
IFI27L2	NM_032036.3	1.79057	5.92592	0.000304366	0.0346392
TENT5A	NM_017633.3	-2.3073	6.02163	0.000305744	0.0346681
ZNF142	NM_001366291.2	8.55891	-0.0397422	0.000307638	0.0346681
PPIP5K2	NM_015216.5	-4.40104	2.63167	0.000307941	0.0346681
APC	NM_001354895.2	-2.83868	3.61054	0.000308225	0.0346681
AFF1	NM_005935.3	-9.2005	1.60901	0.000310236	0.0347698
RPS23	NM_001025.5	1.36865	8.96817	0.000310937	0.0347698
CYB5R3	NM_001171660.1	8.45565	-0.109578	0.000312364	0.0348281
RPL13	NM_000977.3	1.42386	10.438	0.000316916	0.0352336
USP19	NM_001351100.1	-5.49149	1.9465	0.000318028	0.0352553
TMEM160	NM_017854.2	1.9529	4.39448	0.000322216	0.0356169
IL1R1	NM_000877.4	-2.50528	7.05091	0.000323689	0.0356772
MIF	NM_002415.2	1.51639	7.8834	0.00032733	0.0359754
DYNLL1	NM_003746.3	1.41576	7.40576	0.00033251	0.0362392
IFI27	NM_005532.5	2.59686	3.41587	0.000332646	0.0362392
PSMB3	NM_002795.4	1.51274	6.46744	0.000333432	0.0362392
CCL13	NM_005408.3	5.59423	0.78082	0.000333498	0.0362392
MCRIP1	NM_207368.5	1.46817	6.44817	0.000335145	0.0363156
CSNK1G3	NM_001364140.2	-9.04187	1.45781	0.000338234	0.0365473
C11orf96	NM_001145033.2	4.51309	3.35506	0.00033977	0.0366105
ZNF286A	NM_001288646.2	-9.32112	1.72436	0.000340752	0.0366138
CERCAM	NM_001286760.1	-4.72789	2.70655	0.000344046	0.0368647
KYNU	NM_001199241.2	-10.2045	2.58002	0.000346271	0.036979
RNASEK	NM_001004333.4	1.43655	7.17453	0.000347036	0.036979
MCRIP2	NM_138418.4	2.06274	3.92488	0.000349894	0.0371806
RPL27A	NM_000990.5	1.36318	9.69573	0.000351704	0.03727
BRI3	NM_015379.5	1.50324	7.61756	0.000355721	0.0375921
RPS13	NM_001017.3	1.35239	8.42947	0.000359831	0.037823
TMEM65	NM_194291.2	-1.91986	5.34785	0.000359873	0.037823
TNFRSF6B	NM_003823.4	2.3131	4.09553	0.000364139	0.038116
PPP2R5C	NM_001352914.2	9.37813	0.72732	0.000364834	0.038116
COX7C	NM_001867.3	1.42685	6.81198	0.000366214	0.038116
LTBP1	NM_001166265.1	-2.21008	7.72876	0.000366624	0.038116
ARHGAP20	NM_020809.3	-9.44535	1.84359	0.000368386	0.038196
FSTL3	NM_005860.3	1.89396	6.44151	0.000373976	0.0386714
RPS20	NM_001023.3	1.34673	8.89705	0.000376546	0.0388327
NKTR	NM_001349124.2	-4.39681	3.50916	0.000379906	0.0390745
SGO2	NM_152524.6	-9.55666	1.95121	0.00038157	0.0391409
LYSMD3	NM_001286812.1	-9.16038	1.57069	0.000383681	0.0392529
GALNT15	NM_001319051.2	-4.6668	2.51697	0.000385316	0.0393155
ARHGAP19	NM_001256423.2	8.99919	0.47245	0.000389713	0.0395713
RPS11	NM_001015.5	1.38103	9.54275	0.00038988	0.0395713
RPSA	NM_002295.6	1.36941	10.4312	0.000391719	0.0396533
ZC3H11A	NM_001350264.1	-4.26475	3.49036	0.00039338	0.039717
RPS28	NM_001031.5	1.4057	8.57993	0.000397671	0.040045
ALKBH7	NM_032306.4	1.54279	5.51658	0.000400713	0.040246
NDUFB11	NM_019056.6	1.8956	4.16541	0.000410241	0.0410957
ASCC2	NM_001369927.1	-9.07762	1.49194	0.000412602	0.0412248
RASL12	NM_016563.4	-10.0403	2.41957	0.000417699	0.041626
GOLGA8B	NM_001023567.5	-2.83128	4.51099	0.000425018	0.04204
TMSB4X	NM_021109.4	1.58806	11.6579	0.000425622	0.04204
ATP5MC1	NM_001002027.2	1.73675	5.14118	0.00042619	0.04204
PPIA	NM_021130.5	1.32739	10.3817	0.000427828	0.04204
PEA15	NM_003768.5	1.36884	9.77612	0.000428833	0.04204
NDUFB11	NM_001135998.2	1.51285	5.53786	0.000430246	0.04204
HNRNPK	NM_001318188.1	6.81919	3.34288	0.000430807	0.04204
TGFBR3	NM_003243.5	-2.54182	5.15601	0.000431147	0.04204
LRBA	NM_001367550.1	-3.3449	3.6075	0.00043169	0.04204
MRPS24	NM_032014.3	1.46357	6.52034	0.000434705	0.0422268
SRRM1	NM_001366569.1	-9.23821	1.64512	0.000440586	0.0426902
CALM2	NM_001305626.1	-3.01458	3.69525	0.000444271	0.0429009
MZT2A	NM_001085365.2	1.5026	5.70272	0.000444991	0.0429009
PHF21A	NM_001101802.2	-9.03336	1.44966	0.000446166	0.0429067
DMPK	NM_004409.5	1.53665	6.49153	0.000448364	0.0430105
DENND2A	NM_001362678.1	-9.13841	1.54975	0.000449505	0.0430127
CYB561A3	NM_153611.5	1.53199	6.23885	0.000451587	0.0431047
NUP98	NM_001365127.2	-9.21234	1.62026	0.000453762	0.0431625
CCDC167	NM_138493.3	2.3376	3.77107	0.000454436	0.0431625
RPS3A	NM_001006.5	1.3251	9.82103	0.000458745	0.0434644
PAM	NM_001364593.2	8.52045	-0.0862905	0.000460452	0.0435081
MAMDC2	NM_001347990.1	2.88948	2.37392	0.00046258	0.0435081
BLOC1S1	NM_001487.3	1.52762	5.48607	0.000462599	0.0435081
KIAA1522	NM_001369553.1	-9.09222	1.50571	0.000466438	0.0437621
IDH2	NM_002168.3	1.50207	6.89846	0.00046838	0.0438374
NDUFS2	NM_001166159.1	-9.08106	1.49507	0.0004763	0.0444704
SUN1	NM_001367677.1	-9.92863	2.31085	0.000477543	0.0444785
RPS2	NM_002952.4	1.35548	10.7919	0.00047885	0.0444925
WNT16	NM_057168.2	-9.77425	2.16147	0.000481607	0.0446409
FAAP20	NM_182533.3	1.67113	4.88284	0.000485372	0.0448818
TPM2	NM_213674.1	1.34758	10.3156	0.000489212	0.0451283
ERBIN	NM_001253701.2	-2.27101	4.19236	0.000500284	0.0459508
WFDC1	NM_001282466.2	5.82351	1.33937	0.000500517	0.0459508
ATXN7	NM_001128149.3	-9.39847	1.79855	0.000505531	0.0462834
MCF2L	NM_001366646.2	4.7072	1.895	0.000507178	0.0462834
ATOX1	NM_004045.4	1.50724	5.4548	0.000507749	0.0462834
NBR1	NM_001291571.2	-9.24252	1.64909	0.000511484	0.0464889
DYNC2H1	NM_001377.3	-2.36354	5.24408	0.000512421	0.0464889
LAMA3	NM_198129.3	-2.89941	4.13083	0.000518992	0.0469153
ACAT2	NM_005891.3	1.62953	6.03259	0.00051956	0.0469153
ATF7IP	NM_001286515.2	-8.89082	1.31471	0.000522872	0.0469501
IFI16	NM_001206567.2	8.31263	-0.245386	0.000523161	0.0469501
FDFT1	NM_004462.5	1.55134	7.24242	0.000523607	0.0469501
RPL29	NM_000992.3	1.33246	9.3536	0.000531193	0.0475195
PI4KB	NM_001330721.2	9.25502	0.605592	0.000533134	0.0475825
TNFSF13B	NM_006573.4	-9.71124	2.10008	0.000538753	0.047816
RPLP2	NM_001004.4	1.30678	8.63905	0.000538899	0.047816
PRKG1	NM_006258.4	-2.74425	4.63096	0.000539479	0.047816
PFKP	NM_001323067.1	-9.31713	1.72068	0.000542795	0.0479227
GLRX	NM_001118890.2	1.773	5.76521	0.000543175	0.0479227
MEST	NM_002402.4	-9.15336	1.56398	0.000548524	0.0481897
SNTA1	NM_003098.3	1.64037	5.43141	0.000548707	0.0481897
ABCA1	NM_005502.4	-2.18393	5.14528	0.000552928	0.0484499
WASHC2C	NM_001367406.1	-8.95226	1.37277	0.000554621	0.0484877
ZEB1	NM_001323657.2	-8.93901	1.36007	0.000556317	0.0485258
CFH	NM_000186.4	-2.56583	5.29508	0.000562424	0.0489474
ATP5MC3	NM_001689.5	1.4478	7.03601	0.000567752	0.0492996
ARHGEF10	NM_001308153.2	-8.8988	1.32227	0.000571139	0.049482
PRDX4	NM_006406.2	1.33299	6.93229	0.000581195	0.0501211
RAB5IF	NM_018840.5	1.46892	6.2359	0.000581742	0.0501211
PDGFRA	NM_006206.6	-2.14251	8.70778	0.000583796	0.0501211
RPS15	NM_001018.4	1.29806	8.95864	0.000583903	0.0501211
SREBF1	NM_001005291.3	-8.7516	1.1833	0.000586215	0.0501211
PFDN5	NM_145897.2	2.0794	3.71424	0.000586334	0.0501211
RAMP1	NM_005855.4	2.69244	3.25984	0.00058785	0.0501393
IL32	NM_004221.6	3.07468	3.1153	0.000591412	0.0503315
EEF1D	NM_001960.6	1.30659	8.10063	0.000595305	0.0504672
UBTF	NM_001076684.3	2.0637	4.27336	0.000596605	0.0504672
CHCHD2	NM_016139.4	1.33421	7.81405	0.000596942	0.0504672
AFF3	NM_001025108.2	-9.49153	1.88797	0.000602892	0.0508584
RABAC1	NM_006423.3	1.37954	7.59862	0.000605069	0.0509304
GPCPD1	NM_019593.5	-2.45287	4.14678	0.000607982	0.0510638
WASHC2C	NM_001169106.2	-9.88716	2.27076	0.000609676	0.0510946
ALCAM	NM_001627.4	-1.56419	7.26001	0.000614342	0.0513038
DLG1	NM_001366220.1	8.27565	-0.200408	0.00061484	0.0513038
ACAN	NM_001135.3	4.80821	1.94027	0.000620579	0.0516706
YAP1	NM_001282099.1	-9.88673	2.27036	0.000623553	0.0518061
DDHD2	NM_001362913.1	-9.1042	1.51705	0.000632206	0.0524118
ZNF28	NM_001369761.1	-8.72043	1.15394	0.00064158	0.0529819
TTPAL	NM_001261839.2	-8.96214	1.38208	0.000641837	0.0529819
PRKAR1B	NM_002735.2	-8.93901	1.36003	0.000643979	0.0530448
PDE3A	NM_000921.4	-8.89355	1.31715	0.000647974	0.0532599
JPH2	NM_020433.4	1.7637	5.45101	0.000652566	0.0535229
POLR2J	NM_006234.5	1.55298	5.42445	0.000658681	0.0539096
C1orf122	NM_001142726.1	1.462	5.88942	0.000660157	0.0539156
AHI1	NM_001134832.1	-8.9	1.32327	0.000663109	0.054042
S100A11	NM_005620.2	1.35709	8.70296	0.000665574	0.0541282
FIGNL1	NM_022116.6	-8.66434	1.10124	0.000667672	0.0541842
ANAPC11	NM_001002245.2	1.7813	4.21414	0.000670104	0.0542671
PLA2G6	NM_001349866.2	8.19154	-0.318797	0.000675818	0.0546149
USP47	NM_001330208.2	-8.89367	1.31734	0.000677352	0.0546241
IFT80	NM_001190241.2	-4.33649	3.07334	0.000684072	0.055011
STX10	NM_003765.3	1.41596	5.7584	0.00068501	0.055011
PIK3R3	NM_001328651.1	8.23883	-0.233267	0.000690456	0.0553329
MFF	NM_020194.5	-8.86462	1.28973	0.000701111	0.0560699
PSMB5	NM_002797.5	1.32827	7.34088	0.000702962	0.0561014
PCGF5	NM_001257101.1	-3.8153	4.05658	0.000706196	0.0562298
HLTF	NM_139048.3	-8.89039	1.31422	0.000708129	0.0562298
IFI27	NM_001288995.2	2.21791	4.0158	0.000708957	0.0562298
GTF2I	NM_032999.4	-8.66922	1.10597	0.000716212	0.0566884
MAN1A1	NM_005907.4	-2.08376	6.55113	0.000719956	0.0568677
ZEB1	NM_030751.6	-2.19444	4.98447	0.000723055	0.0569131
BNC2	NM_001317939.2	-8.92322	1.34523	0.00072349	0.0569131
BDP1	NM_018429.3	-1.92304	4.74302	0.000727137	0.0569897
HSD3B7	NM_001142778.2	8.23944	-0.31859	0.000728223	0.0569897
CEP126	NM_001363543.2	-8.66127	1.09838	0.000728909	0.0569897
CCDC191	NM_020817.2	-8.72319	1.15644	0.000730947	0.0570331
ANAPC11	NM_001002246.2	1.85249	4.08903	0.000735718	0.0571804
PCM1	NM_001352644.2	-4.24483	2.8368	0.000736945	0.0571804
PPP1R14B	NM_138689.3	1.52477	7.948	0.000737294	0.0571804
DGKH	NM_001204504.2	-10.061	2.44002	0.000752744	0.0582612
NPR3	NM_001204376.1	-9.82348	2.2091	0.000759786	0.0586852
PRELID1	NM_013237.4	1.52044	7.45801	0.000764388	0.0586852
DUSP6	NM_022652.4	6.04177	0.514544	0.00076457	0.0586852
VAMP5	NM_006634.3	1.38733	6.31352	0.000767926	0.0586852
NQO1	NM_001025433.2	1.67027	4.89884	0.000768117	0.0586852
PRDX5	NM_012094.5	1.40466	7.58818	0.000768308	0.0586852
EPHA4	NM_001363748.2	-9.14909	1.55981	0.000768902	0.0586852
SPIDR	NM_001352959.1	8.17676	-0.356324	0.000773551	0.0589231
CMIP	NM_030629.3	9.1204	0.472854	0.000775862	0.0589824
RPL23	NM_000978.4	1.29154	9.006	0.000783804	0.0594686
HIPK2	NM_001113239.3	-2.59357	4.25084	0.000787142	0.0596043
RPL28	NM_000991.5	1.29596	8.52841	0.000793062	0.0599346
EIF6	NM_002212.4	1.42557	6.88947	0.000798993	0.0602644
RBM41	NM_001324242.2	-8.74776	1.17959	0.000802345	0.0603766
SLC38A2	NM_001307936.2	-2.4409	6.02847	0.000804053	0.0603766
TPD52L1	NM_001003396.3	3.76327	1.38609	0.000805189	0.0603766
PER3	NM_016831.3	-8.67874	1.11479	0.000807572	0.0604375
INVS	NM_001318381.1	-8.67398	1.11051	0.000815116	0.0608836
IP6K2	NM_001005909.2	-8.66729	1.10405	0.000818688	0.0610319
NFYA	NM_021705.4	-8.64532	1.0836	0.000821332	0.0611106
TSPAN4	NM_003271.5	1.37315	6.0217	0.000822927	0.0611111
NOTCH2NLC	NM_001364013.1	2.3426	3.24219	0.000825659	0.0611958
PKN1	NM_002741.5	1.30611	7.95689	0.000838255	0.0619549
IQCE	NM_001287502.2	8.13922	-0.336916	0.00083995	0.0619549
IKZF2	NM_016260.3	-8.98607	1.40471	0.000840849	0.0619549
ABCA5	NM_018672.4	-9.10803	1.52059	0.000843944	0.0619549
SLC4A7	NM_001321108.2	-2.78926	3.5813	0.000843954	0.0619549
TMA7	NM_015933.6	1.42058	6.17261	0.000854433	0.0625689
MKX	NM_173576.3	-1.6224	6.69899	0.000855571	0.0625689
RPL13A	NM_012423.4	1.30777	11.1821	0.000864389	0.0630938
NOTCH2NLB	NM_001364008.1	-2.84822	3.24105	0.000871871	0.0635194
XAF1	NM_001353138.2	-6.5348	1.64253	0.000877527	0.0638107
MLEC	NM_001303627.1	-8.69975	1.13436	0.000886841	0.0643663
NTSR1	NM_002531.3	3.68397	2.51792	0.000893129	0.0647006
GSTM3	NM_000849.5	1.90137	6.21576	0.000895704	0.0647651
GTF2I	NM_033000.4	-1.69718	6.28018	0.00089781	0.0647956
ZNF525	NM_001348156.2	-8.52633	0.972347	0.000905227	0.0652086
ZBTB21	NM_001320729.2	-8.54523	0.990098	0.000915541	0.0657936
CASP8AP2	NM_012115.4	-8.50747	0.954722	0.000916769	0.0657936
TPR	NM_003292.3	-1.61058	6.17566	0.000919494	0.0658663
VWA5A	NM_014622.4	-4.69773	2.77426	0.000931003	0.0665401
PFKFB4	NM_001317136.2	-8.54895	0.993327	0.000932617	0.0665401
RNH1	NM_203388.3	1.29427	7.24418	0.00093409	0.0665401
ZSCAN25	NM_001350979.2	-9.05511	1.47046	0.000938218	0.0667106
UQCR10	NM_013387.4	1.52393	5.20955	0.000943281	0.0668798
RPL12	NM_000976.4	1.30336	9.24628	0.000946691	0.0668798
TCF12	NM_207040.2	-2.00158	5.53653	0.000947146	0.0668798
PPP2R5E	NM_001282180.3	-8.92913	1.35074	0.000947552	0.0668798
ZMYM4	NM_001350140.2	-9.0538	1.46916	0.000959014	0.0675648
NCOA1	NM_001362954.1	-8.83363	1.26029	0.000962819	0.0675921
ZBTB42	NM_001137601.3	-8.59369	1.03519	0.00096334	0.0675921
CHCHD10	NM_213720.3	1.47621	5.45041	0.000964708	0.0675921
KIF27	NM_017576.4	-8.52814	0.973968	0.000966429	0.0675921
FAM98A	NM_001304538.1	-8.75517	1.18666	0.000981157	0.0684976
NDUFB8	NM_005004.4	1.35898	6.41645	0.000987145	0.0687908
CLTB	NM_001834.5	1.33831	7.20536	0.00099323	0.0688955
GSTO1	NM_004832.3	1.47882	6.98943	0.000993297	0.0688955
C1QTNF5	NM_001278431.2	1.85699	5.86014	0.000994021	0.0688955
PLEKHA5	NM_019012.6	-2.14836	5.13873	0.000998323	0.0690532
FOS	NM_005252.4	2.86215	2.56383	0.00100202	0.0690532
SIX4	NM_017420.5	-2.5838	4.33866	0.00100291	0.0690532
AHCTF1	NM_001323343.2	-8.91822	1.34047	0.00100513	0.0690532
NDUFB1	NM_004545.4	1.7298	4.21605	0.00100527	0.0690532
DLG1	NM_001366219.1	8.08999	-0.37336	0.00100848	0.06915
CCDC107	NM_174923.3	1.6746	4.65717	0.00102104	0.0698868
NDUFS6	NM_004553.5	1.49045	5.42722	0.00102574	0.0698972
TM4SF20	NM_024795.4	4.39362	1.03719	0.00102979	0.0698972
DOCK10	NM_001363762.1	-9.04953	1.46503	0.00103047	0.0698972
EDF1	NM_003792.4	1.2797	7.28426	0.00103078	0.0698972
TLR4	NM_138554.5	-9.71791	2.10651	0.0010318	0.0698972
FUBP1	NM_001303433.1	-8.50069	0.948637	0.0010321	0.0698972
PHLDA2	NM_003311.4	1.75819	6.22546	0.00104028	0.0703279
TIMP3	NM_000362.4	-3.09508	9.4333	0.00104443	0.0704841
A1BG	NM_130786.4	1.8717	3.99668	0.00104838	0.0706269
AP2S1	NM_004069.5	1.35142	7.3521	0.00105204	0.0706739
NQO1	NM_001025434.2	1.44332	5.75647	0.00105275	0.0706739
NBPF1	NM_017940.6	-1.74497	5.81919	0.00105823	0.0709178
MYDGF	NM_019107.4	1.25015	7.99558	0.00106557	0.0712397
ZKSCAN8	NM_001278121.1	-8.82353	1.25102	0.00106673	0.0712397
PHACTR4	NM_001350160.2	-8.46883	0.918752	0.00107285	0.0715242
THRB	NM_001128177.2	-9.10254	1.51519	0.00108589	0.0722683
POT1	NM_001042594.1	-8.47303	0.922781	0.00109572	0.0726028
APAF1	NM_013229.3	9.01063	0.36481	0.00109626	0.0726028
LTBP4	NM_003573.2	9.01063	0.36481	0.00109658	0.0726028
GPATCH8	NM_001304941.2	-4.55018	2.94024	0.00110104	0.0727724
COA3	NM_001040431.3	1.46573	5.10842	0.00110449	0.0728752
ATG101	NM_021934.4	1.35886	5.87934	0.00110944	0.0729269
TASOR2	NM_001321784.1	-9.71013	2.09932	0.00111105	0.0729269
FRAS1	NM_025074.7	-3.52535	3.36364	0.00111327	0.0729269
CSNK1G1	NM_001329606.2	8.61276	0.124336	0.0011139	0.0729269
TALDO1	NM_006755.2	1.44295	8.11411	0.00111475	0.0729269
SAA1	NM_199161.5	3.927	2.29465	0.00111849	0.0730476
CEP192	NM_032142.4	-2.1906	4.29403	0.00112702	0.0734795
SLFN5	NM_144975.4	-1.67212	7.43366	0.00113656	0.0737947
PDE1C	NM_001322055.1	-8.99041	1.4091	0.00113706	0.0737947
FBXW5	NM_018998.4	1.24457	7.46842	0.0011388	0.0737947
H2AJ	NM_177925.3	1.37869	6.05888	0.00113952	0.0737947
VPS25	NM_032353.4	1.41798	5.69507	0.00114201	0.0738314
ZBTB4	NM_020899.4	-2.13359	4.38978	0.00114402	0.0738375
MIB2	NM_080875.3	-3.02591	3.24078	0.0011481	0.0739763
HNRNPC	NM_001077442.1	1.80695	5.96814	0.00115321	0.0741813
CEP350	NM_014810.5	-1.80735	5.09963	0.00115773	0.0742512
SNU13	NM_001003796.2	1.32732	6.38541	0.00115815	0.0742512
ZC3H14	NM_001326312.2	-8.9057	1.32874	0.00116058	0.0742826
DNPH1	NM_006443.3	1.61317	4.9237	0.00116598	0.0745046
UVSSA	NM_020894.4	-8.63836	1.07682	0.00117401	0.0748931
PFKFB3	NM_001282630.2	-8.41368	0.867698	0.00117951	0.0751193
SCO2	NM_005138.2	1.722	4.33461	0.00119232	0.0758099
COPRS	NM_018405.4	1.55792	6.10866	0.00119863	0.076085
ELOB	NM_207013.3	1.41823	6.17321	0.00120128	0.076128
TNFRSF19	NM_148957.4	-9.09689	1.50988	0.00121187	0.0761746
EBP	NM_006579.3	1.68634	4.75084	0.00121701	0.0761746
ZNF841	NM_001369828.1	-8.47155	0.921348	0.00122022	0.0761746
KIAA1109	NM_015312.3	-1.75562	6.15304	0.00122339	0.0761746
CCDC85A	NM_001080433.2	-8.82313	1.25056	0.00122371	0.0761746
CREBZF	NM_001039618.3	-1.72678	5.56644	0.00122877	0.0761746
ATP5MPL	NM_004894.3	1.44809	5.33483	0.0012288	0.0761746
FAM174C	NM_017914.4	1.49117	4.96745	0.00122946	0.0761746
GSKIP	NM_001271905.1	-5.29486	2.35127	0.00123054	0.0761746
SEMA3C	NM_006379.5	-1.48193	6.54754	0.00123085	0.0761746
ERCC6	NM_001304531.1	8.97207	0.326965	0.00123217	0.0761746
KCNAB2	NM_001199860.2	8.97207	0.326965	0.00123288	0.0761746
PRKAG2	NM_001277059.1	8.97207	0.326965	0.00123323	0.0761746
YTHDC2	NM_001345975.2	-8.3655	0.823068	0.00123344	0.0761746
CDK2AP2	NM_005851.5	1.58302	4.54956	0.00123362	0.0761746
TNRC6A	NM_001330520.3	-1.52765	6.30147	0.00123455	0.0761746
AMBRA1	NM_001367469.1	-8.59112	1.03265	0.00123605	0.0761746
NXPE3	NM_001348990.2	-8.43982	0.891852	0.00123766	0.0761746
INKA2	NM_019099.5	1.75507	4.53788	0.00125486	0.0770514
IL32	NM_001308078.3	4.98453	1.50023	0.00125591	0.0770514
DHX29	NM_001345964.2	-8.89087	1.31452	0.00125934	0.0770869
GAREM1	NM_001242409.2	-8.51649	0.963043	0.0012605	0.0770869
BTAF1	NM_003972.3	-1.65909	5.48645	0.00127105	0.0776089
ZEB1	NM_001174096.1	-1.88106	5.25365	0.00127772	0.077892
UQCC2	NM_032340.4	1.58053	4.7081	0.00128836	0.0783047
POLR2G	NM_002696.3	1.42269	5.31983	0.00128985	0.0783047
KIAA0100	NM_001363826.1	-5.76474	1.69959	0.00129059	0.0783047
COL4A1	NM_001845.6	1.6629	8.66786	0.00129744	0.0784674
MANF	NM_006010.6	1.42348	5.74657	0.00129895	0.0784674
SNRPG	NM_003096.4	1.5439	5.31372	0.00129939	0.0784674
CLIC1	NM_001288.4	1.53619	9.0879	0.00130406	0.078626
PWWP2B	NM_138499.4	1.57239	4.50826	0.00131136	0.0789421
SLC9A3R2	NM_004785.6	1.91096	3.88332	0.00131433	0.0789973
EMP3	NM_001425.3	1.25519	7.36376	0.00131645	0.0790016
SYT11	NM_152280.5	-1.68542	5.69828	0.00131854	0.0790035
EZH1	NM_001321082.2	-8.35078	0.8094	0.00133128	0.0796429
COL13A1	NM_001320951.2	-8.52966	0.97572	0.00133914	0.079889
WDHD1	NM_001008396.3	-8.63167	1.07104	0.00134109	0.079889
TRAPPC3	NM_014408.5	1.33223	5.87575	0.00134162	0.079889
TGOLN2	NM_001368095.1	-9.00351	1.4212	0.00134544	0.0799816
ICAM5	NM_003259.4	2.91288	3.14995	0.0013491	0.0799816
UBR5	NM_015902.6	-1.43505	6.77572	0.00135062	0.0799816
ZC3H11A	NM_001350266.1	-9.21473	1.62258	0.0013515	0.0799816
RABGEF1	NM_001367746.1	4.48348	2.04697	0.00135575	0.0801098
CUTA	NM_001014433.2	1.50641	5.09909	0.00136591	0.0803107
ZDHHC4	NM_001365413.2	8.93245	0.288127	0.00136853	0.0803107
MRTFB	NM_001320740.1	8.93246	0.288127	0.00136881	0.0803107
LRRC8D	NM_018103.5	8.93246	0.288127	0.00136889	0.0803107
FAM107B	NM_001371295.1	8.93246	0.288127	0.00136958	0.0803107
ARID4B	NM_031371.4	-4.26934	2.37278	0.0013799	0.0806035
WDR47	NM_014969.5	-8.83098	1.25799	0.0013804	0.0806035
LSM10	NM_032881.3	1.47044	4.83783	0.00138086	0.0806035
RNMT	NM_003799.3	-1.86589	4.75894	0.00138704	0.0808412
SZT2	NM_015284.4	-9.52491	1.92015	0.00139057	0.0808934
MGST3	NM_004528.4	1.3539	6.75699	0.00139272	0.0808934
HES4	NM_001142467.2	3.9351	2.08377	0.00139424	0.0808934
MPG	NM_001015052.3	1.2541	6.91592	0.00141058	0.0817182
SRP14	NM_003134.6	1.22135	7.88499	0.00141696	0.0819314
MCM4	NM_005914.4	-8.77313	1.20391	0.00141852	0.0819314
EHBP1L1	NM_001351087.1	1.99693	3.78786	0.00142929	0.0824296
CEBPZOS	NM_001322373.2	-8.72874	1.16207	0.00143658	0.0827257
TRIM2	NM_001351054.2	-8.71199	1.14609	0.00145203	0.0834527
PRDX1	NM_181697.3	1.2361	8.18106	0.00145354	0.0834527
FKRP	NM_001039885.3	2.1869	3.31587	0.00145579	0.0834571
COPE	NM_007263.4	1.24528	7.25651	0.00146021	0.0835861
HPS1	NM_001322489.1	-8.70597	1.14035	0.0014641	0.0836844
ZFP14	NM_001297619.2	-8.48296	0.931876	0.0014805	0.084496
MTR	NM_000254.2	-1.68977	5.06717	0.00148786	0.0847904
JAK2	NM_004972.3	-4.06552	2.39607	0.00149207	0.0849043
TMEM147	NM_032635.4	1.36695	5.84529	0.00149622	0.0850151
NEK1	NM_001199397.2	-8.51316	0.960012	0.001499	0.0850473
ZNF92	NM_152626.4	-8.68797	1.12348	0.00150709	0.0853801
STMN3	NM_015894.4	1.709	4.50017	0.00151056	0.0853954
MYSM1	NM_001085487.3	-1.97279	4.5757	0.0015118	0.0853954
SPOP	NM_001007229.1	-8.35088	0.809677	0.00152642	0.0860951
PPM1L	NM_139245.4	-8.41126	0.865248	0.00153052	0.0861998
COMMD6	NM_203495.3	1.41491	5.11709	0.00153558	0.0863587
LAGE3	NM_006014.4	1.69575	4.10237	0.00154996	0.0869637
NTNG1	NM_001372171.1	-8.56418	1.00754	0.00155087	0.0869637
ANTKMT	NM_023933.3	1.69705	4.31752	0.00155406	0.087016
MPST	NM_001013436.3	2.21714	3.07584	0.0015583	0.0871267
COLEC12	NM_130386.3	-2.22747	7.80002	0.00156498	0.0871802
ABCB4	NM_000443.4	-8.53061	0.976179	0.00156893	0.0871802
UBXN6	NM_025241.3	1.22627	7.75796	0.00157036	0.0871802
TSC2	NM_021055.2	-8.54759	0.991914	0.00157156	0.0871802
TP53BP1	NM_005657.4	-8.65533	1.09289	0.0015762	0.0871802
TPST2	NM_001362922.2	3.22827	1.9872	0.00157639	0.0871802
S100A6	NM_014624.4	1.22188	10.7561	0.00157691	0.0871802
TPM2	NM_001301226.2	1.47725	7.71766	0.00157739	0.0871802
NCEH1	NM_001146276.3	-8.43306	0.885868	0.00159647	0.088095
YTHDF3	NM_001277817.1	-8.53554	0.981173	0.00159852	0.088095
TRIQK	NM_001171796.2	-8.64078	1.07924	0.00160576	0.0881748
KIAA0895L	NM_001369685.1	7.99766	-0.542411	0.00160641	0.0881748
ZNF382	NM_032825.5	-8.82257	1.25004	0.00160685	0.0881748
PSIP1	NM_001128217.2	-2.05811	4.2176	0.00161999	0.0887694
OGT	NM_181672.3	-1.77157	6.85564	0.00163127	0.0891722
C1RL	NM_001297642.2	-8.69526	1.13014	0.00163198	0.0891722
EPM2AIP1	NM_014805.4	-1.99095	4.2741	0.00164041	0.0895058
MDM4	NM_001204171.1	-8.81682	1.24474	0.00164385	0.0895668
PPFIBP2	NM_001351861.1	2.58251	2.67438	0.00164909	0.0897248
REV1	NM_001321460.2	-8.36809	0.825506	0.00165465	0.0899005
ITGB5	NM_001354764.1	8.84977	0.207258	0.0016609	0.0900089
DNAJA4	NM_001130183.1	8.84977	0.207258	0.00166133	0.0900089
KDM6B	NM_001080424.2	-8.30769	0.769597	0.00166415	0.0900351
CRYAB	NM_001885.3	1.85871	4.87224	0.00167016	0.0901716
OLFML1	NM_198474.4	-4.21571	4.25381	0.00167136	0.0901716
PDE3A	NM_001244683.1	8.1492	-0.439231	0.00168606	0.0908371
SEPTIN9	NM_001113491.2	-9.46168	1.85973	0.00169378	0.0911251
SEC31A	NM_001077206.3	-1.62597	6.63278	0.00171261	0.0920097
MTHFD1L	NM_001242768.1	8.43005	-0.0369393	0.00172111	0.0923374
ITGAV	NM_001144999.2	-8.31686	0.778301	0.00172659	0.0925022
SUPT4H1	NM_003168.3	1.31868	5.76024	0.0017346	0.0928021
CDC25B	NM_021872.3	-8.64897	1.08702	0.00173767	0.0928373
TNFSF10	NM_003810.4	-8.73811	1.17033	0.0017419	0.0929346
CHPF	NM_024536.6	1.24089	7.96424	0.00177191	0.0941798
DDX42	NM_203499.3	-1.41822	6.33253	0.00177222	0.0941798
RAP2C	NM_001271186.2	-8.64545	1.08358	0.00177259	0.0941798
PRDX6	NM_004905.3	1.3918	8.12966	0.00177547	0.0942029
RIN2	NM_001242581.1	-8.55126	0.995231	0.00178157	0.0943163
DTNA	NM_001198940.2	-8.38378	0.839822	0.00178401	0.0943163
FOXJ3	NM_001198852.1	-2.29769	3.64172	0.00178597	0.0943163
HDAC6	NM_001321225.2	8.41373	-0.0512366	0.00178742	0.0943163
EGFL7	NM_201446.3	1.60944	4.36341	0.00179942	0.0948194
KAT6B	NM_001370132.1	-8.3485	0.807379	0.00180192	0.0948214
CIAO2B	NM_016062.4	1.40523	5.49625	0.00180665	0.0949063
ISG20L2	NM_001303095.1	-9.49414	1.89037	0.00180847	0.0949063
GJA1	NM_000165.5	-1.45244	8.50167	0.001828	0.0958005
MKNK2	NM_017572.4	1.66945	4.95209	0.00184877	0.0967572
DLG1	NM_001366205.1	5.88825	0.282902	0.00185182	0.0967759
PRDX5	NM_181652.3	2.1754	3.19478	0.00185665	0.0967759
NRF1	NM_001040110.1	8.80661	0.16511	0.00185667	0.0967759
NRDC	NM_002525.2	-9.52233	1.91774	0.00186727	0.0971963
ZCCHC7	NM_001289119.1	-8.36638	0.823743	0.00187063	0.0972401
PRAG1	NM_001369759.1	5.63424	0.672177	0.00187818	0.0975006
BICC1	NM_001080512.3	-1.70652	6.95494	0.00188703	0.0977617
TPM1	NM_001365782.1	-9.54523	1.94007	0.00188829	0.0977617
ZC3H13	NM_001330565.2	-4.63868	2.45825	0.00189093	0.0977665
NR1D2	NM_005126.5	-1.88803	5.85879	0.00189514	0.0978007
PPAN-P2RY11	NM_001040664.3	8.39716	-0.0656783	0.0018974	0.0978007
RBM25	NM_021239.3	-1.50739	5.91143	0.00189922	0.0978007
TRIR	NM_024038.4	1.21525	7.30004	0.00190494	0.0979149
FGF2	NM_002006.5	-1.45462	6.27344	0.00190652	0.0979149
DCLK1	NM_001330071.2	-8.57918	1.02133	0.00191003	0.0979643
GET3	NM_004317.4	1.25278	6.51154	0.00191846	0.0982655
TAF1	NM_138923.3	-8.36199	0.82006	0.00192663	0.0985256
C19orf54	NM_001353806.2	-5.07845	1.53385	0.00192866	0.0985256
MRFAP1	NM_001272053.1	1.48852	5.11163	0.00194235	0.0990885
STARD4	NM_001308058.1	-8.37567	0.832531	0.00194483	0.0990885
COX7A2L	NM_001319037.1	1.45864	4.87736	0.00195411	0.0993297
IL32	NM_001012718.3	2.81343	2.61603	0.00195473	0.0993297
NCOA7	NM_181782.5	-3.99513	3.21467	0.00196943	0.0998076
CDK14	NM_001287135.2	-1.73798	4.99746	0.00197081	0.0998076
ISM1	NM_080826.2	-4.66959	2.9147	0.00197192	0.0998076
NOSIP	NM_001270960.2	1.346	5.43633	0.00197633	0.0998997
GRIA3	NM_000828.4	-9.44914	1.84753	0.00198065	0.0999867
ZNF473	NM_001006656.4	-8.292	0.755409	0.00198482	0.100065
NUPR1	NM_012385.3	1.73307	7.68228	0.00199131	0.100262
RPL18	NM_000979.4	1.17449	9.13511	0.0020025	0.100693
BMP4	NM_001347914.1	-8.59899	1.04019	0.00200541	0.100708
TM9SF4	NM_001363731.1	-8.26864	0.73383	0.0020103	0.100799
ZNF292	NM_015021.3	-2.37314	3.9213	0.00201246	0.100799
SOX4	NM_003107.3	-2.86296	5.93435	0.00202622	0.101323
TBCB	NM_001281.3	1.27078	6.49137	0.00203056	0.101323
CEP112	NM_001199165.4	-8.40744	0.86206	0.00203083	0.101323
KDM6A	NM_001291416.1	-8.38563	0.841656	0.00203373	0.101336
PHLDA3	NM_012396.5	1.19909	7.51819	0.00203714	0.101375
INTS14	NM_001366364.2	-8.35586	0.814387	0.00204772	0.101658
SYNGR2	NM_004710.6	1.42489	5.14399	0.0020491	0.101658
TSTA3	NM_003313.4	1.42417	5.46811	0.00205077	0.101658
OFD1	NM_003611.3	-4.0581	2.17284	0.00205723	0.101848
ADNP	NM_001347511.2	8.36354	-0.0950066	0.00206902	0.1023
SPSB2	NM_001146316.2	-8.22528	0.693931	0.00207381	0.102378
PRDX5	NM_001358511.2	1.7343	4.05742	0.00207592	0.102378
H1-2	NM_005319.3	1.76553	4.10811	0.00210398	0.103628
RPL34	NM_001319236.1	1.25677	7.97933	0.00211453	0.104015
HSPH1	NM_001286504.1	-8.23986	0.707111	0.0021372	0.104996
TBC1D7	NM_001143965.3	2.33991	2.71378	0.00214652	0.105247
CDC34	NM_004359.2	1.30813	5.71658	0.00214778	0.105247
SNX13	NM_001350862.2	-8.63371	1.07253	0.0021516	0.1053
SEMA3A	NM_006080.3	-2.03999	4.52276	0.00215561	0.105362
ZNF493	NM_001076678.3	-8.31549	0.77663	0.00216033	0.105459
RPS4X	NM_001007.5	1.27333	9.41108	0.00217869	0.10622
FAM111A	NM_198847.3	-9.75628	2.14431	0.00218178	0.106236
LENG8	NM_052925.4	-1.61347	6.06895	0.00219656	0.10682
WDR31	NM_001012361.4	-8.28528	0.748915	0.00220204	0.106858
NSD1	NM_172349.2	-11.6673	4.02109	0.00220289	0.106858
PPIP5K1	NM_001354402.1	-8.24463	0.71183	0.00222739	0.107911
NDUFS5	NM_004552.3	-4.65207	3.19237	0.00223443	0.108063
C4orf48	NM_001168243.1	1.40232	4.86743	0.00223616	0.108063
TOMM5	NM_001001790.3	1.45641	5.44899	0.0022421	0.108088
NFATC4	NM_001288802.2	-9.82727	2.21229	0.00224229	0.108088
PNN	NM_002687.4	-1.58045	5.33515	0.00225362	0.108435
PDLIM2	NM_001368120.1	1.31095	7.17834	0.00225513	0.108435
N4BP2	NM_001318359.2	-9.43599	1.83436	0.00226154	0.108608
USP48	NM_001350166.2	-4.86071	1.93795	0.00226768	0.108767
SACS	NM_001278055.2	-3.44545	5.16085	0.00227225	0.10885
CCNQ	NM_152274.5	1.81165	3.79224	0.00227883	0.109029
TMEM208	NM_014187.4	1.46859	4.70757	0.00228894	0.109252
ETHE1	NM_001320869.2	2.86962	2.05009	0.00228955	0.109252
ARRDC3	NM_020801.4	-1.87772	4.81128	0.00229201	0.109252
ADARB1	NM_001346688.1	-8.16113	0.635114	0.00231008	0.109522
RPS27L	NM_015920.4	1.36837	6.66339	0.00231017	0.109522
COA4	NM_016565.3	1.4303	5.11364	0.00231085	0.109522
ARHGAP5	NM_001030055.2	-1.67405	5.43662	0.00231339	0.109522
SRRM1	NM_001366571.1	-8.61515	1.05496	0.00231434	0.109522
PSMB6	NM_002798.3	1.23878	6.64954	0.002315	0.109522
CARS2	NM_024537.4	1.27297	6.48458	0.0023176	0.109522
BOLA2	NM_001031827.2	2.33172	2.77245	0.00232255	0.109622
MRPL52	NM_181305.3	2.34996	3.29092	0.00235736	0.111107
TMED3	NM_007364.4	1.20093	7.44324	0.0023598	0.111107
ZNF320	NM_001351776.2	-9.29923	1.70336	0.0023686	0.111385
DNAJC16	NM_001287811.1	-8.18778	0.6595	0.00237167	0.111393
PHIP	NM_017934.7	-1.76308	5.06069	0.00237777	0.111441
CCN5	NM_001323370.1	-5.26396	7.04666	0.00237848	0.111441
FNIP1	NM_001346114.2	-8.36186	0.819827	0.00240231	0.11242
NDUFA8	NM_014222.3	1.35926	5.25016	0.00241005	0.112626
ATP2C1	NM_001199184.2	-1.88356	4.56252	0.00241545	0.112626
GABARAP	NM_007278.2	1.2509	8.12489	0.0024155	0.112626
ST3GAL3	NM_174964.4	-8.18729	0.659135	0.00243141	0.113231
ZC3H13	NM_001330567.2	-4.12638	2.70454	0.00243735	0.113371
RAD50	NM_005732.4	-1.54489	5.46688	0.0024444	0.113551
LMCD1	NM_001278234.1	2.11278	3.32393	0.00244713	0.113551
ANAPC11	NM_001002248.2	1.6601	4.16992	0.00246458	0.114223
CCZ1	NM_015622.6	-1.86572	4.40593	0.00248068	0.11475
CRYBG3	NM_153605.4	-2.30347	4.94628	0.00248191	0.11475
LRCH3	NM_001365716.1	-4.90371	1.3703	0.00248785	0.114886
PHB	NM_002634.4	1.35966	6.88109	0.00249384	0.115025
POLI	NM_001351615.2	-8.52948	0.974816	0.00250897	0.115584
CARD19	NM_032310.5	1.50208	4.47681	0.00251943	0.115927
STRADA	NM_001003786.3	6.08369	-0.305793	0.00252468	0.11603
PLA2G4C	NM_003706.3	2.7132	2.35234	0.00253839	0.11652
DMAC2	NM_001167867.2	8.25783	-0.186784	0.00254395	0.116637
IDE	NM_001322796.1	-8.19235	0.663728	0.00255674	0.116969
TTC3	NM_001330681.2	-1.58375	6.7129	0.00255729	0.116969
RPS6KC1	NM_001349657.1	8.66877	0.0310076	0.00256936	0.117273
RPS3	NM_001005.5	1.17868	7.85024	0.00257003	0.117273
DTNB	NM_001351394.1	8.08877	-0.504481	0.00257724	0.117463
BMP2K	NM_198892.1	-1.86015	5.00575	0.0025928	0.118032
EIF4G1	NM_198242.3	-3.62331	5.37114	0.0025963	0.118052
BHLHB9	NM_001142529.1	-8.25735	0.723577	0.00260497	0.118306
NCOA1	NM_001362955.1	-8.57903	1.02156	0.00261034	0.11841
PLAGL1	NM_001317156.1	-8.22443	0.692909	0.00261778	0.118608
ZBTB21	NM_001320731.2	-8.14699	0.622149	0.00262107	0.118617
AUP1	NM_181575.5	1.23003	6.32722	0.00263104	0.118821
ROBO1	NM_133631.3	-1.52146	6.45249	0.00263684	0.118821
BSDC1	NM_001300958.2	-3.36364	2.62126	0.00263813	0.118821
LUC7L3	NM_016424.5	-2.29218	4.33901	0.00263963	0.118821
PCDHGA9	NM_018921.2	-3.69936	3.66214	0.00264101	0.118821
METRN	NM_024042.4	1.30793	6.22284	0.00264701	0.118952
UBXN6	NM_001171091.2	1.74335	4.63138	0.00267582	0.120106
PTRHD1	NM_001013663.1	1.51606	4.42744	0.00268506	0.120338
MFAP3	NM_001242336.2	-8.22623	0.694637	0.00268867	0.120338
PDZD11	NM_016484.5	1.37673	5.1857	0.00269088	0.120338
UACA	NM_018003.4	-1.63586	5.41319	0.00269498	0.120338
PPFIBP2	NM_001351856.1	-8.20362	0.673769	0.00269756	0.120338
PAX9	NM_001372076.1	-2.86017	3.56633	0.00269977	0.120338
BAX	NM_138761.4	1.19556	6.36699	0.00271708	0.12097
NR1H2	NM_001256647.2	1.78914	3.79703	0.00272478	0.121092
VPS13C	NM_018080.3	-3.21434	2.83612	0.00272731	0.121092
C17orf80	NM_017941.5	-9.25865	1.66437	0.00272926	0.121092
RNF7	NM_014245.5	1.27131	5.67757	0.00273734	0.12131
C12orf4	NM_001346153.1	-8.16519	0.63888	0.00276006	0.122176
REV3L	NM_001286432.1	-3.93611	4.70092	0.00276756	0.122232
LYRM4	NM_020408.5	1.50075	4.37934	0.0027683	0.122232
FAM89B	NM_001098785.2	1.45891	5.26734	0.00277085	0.122232
OAZ1	NM_004152.3	1.14658	9.73693	0.00278173	0.122571
NOTCH3	NM_000435.3	1.55915	5.70804	0.00281364	0.123835
POLD4	NM_021173.5	1.32304	5.64208	0.00284546	0.124965
TBC1D3	NM_001123391.3	-8.60341	1.04394	0.00284706	0.124965
HAX1	NM_006118.4	1.26371	6.25611	0.00284906	0.124965
CCDC88A	NM_001365480.1	-3.37505	3.9202	0.00287558	0.125957
HACD1	NM_014241.4	1.45635	5.30195	0.00287822	0.125957
AURKAIP1	NM_001127229.2	1.44306	4.8667	0.00288798	0.126241
TNFRSF21	NM_014452.5	-1.85173	4.60963	0.00289472	0.126392
PSMB4	NM_002796.3	1.17131	7.52158	0.00290892	0.126868
TRIP12	NM_001351184.1	8.61979	-0.0165055	0.00291928	0.127153
NT5C2	NM_001348317.1	8.61979	-0.0165055	0.00292207	0.127153
PTGFR	NM_001039585.2	-3.54951	2.98619	0.00292868	0.127296
RHOT2	NM_001352280.2	7.87325	-0.52499	0.00294261	0.127649
ADAM10	NM_001110.4	-1.46686	6.87809	0.00294342	0.127649
MRPS11	NM_022839.5	1.44371	4.73352	0.00295926	0.128191
NDUFB4	NM_004547.6	1.2582	5.74769	0.00296551	0.128318
BRWD1	NM_033656.4	-2.16442	4.20769	0.00298412	0.128978
ATP1A1	NM_001160234.1	-11.0823	3.44267	0.00298815	0.129007
FAM13B	NM_001101800.2	4.40532	1.71712	0.00299202	0.129029
MRVI1	NM_001098579.2	-7.12798	2.18083	0.00299674	0.129029
C21orf58	NM_001286476.1	-8.51856	0.965569	0.00300057	0.129029
RBM4	NM_001198843.1	1.75569	3.77517	0.00300334	0.129029
KRAS	NM_033360.4	-8.23597	0.703653	0.00300542	0.129029
ZNF521	NM_015461.3	-2.24265	4.58724	0.0030143	0.129189
TIMM13	NM_012458.4	1.26851	5.8788	0.00301589	0.129189
PTER	NM_001001484.2	-8.2348	0.702566	0.00302186	0.129301
KLC2	NM_001134776.2	-9.31792	1.72156	0.00303425	0.129554
SLC16A3	NM_004207.3	1.18709	8.91371	0.00303451	0.129554
SOD2	NM_001322814.2	-4.50687	3.8664	0.00304314	0.129779
PGBD1	NM_001184743.1	-8.20892	0.678837	0.00305592	0.13018
CARF	NM_001104586.4	-8.4177	0.871014	0.00307344	0.130781
LMOD1	NM_012134.3	1.22074	6.79288	0.00307969	0.130902
SMC3	NM_005445.3	-1.46434	5.3422	0.00310208	0.131708
IRAK1	NM_001569.4	1.32006	7.80922	0.003107	0.131772
SCAND1	NM_033630.2	1.26907	5.56478	0.00311127	0.131808
IFI27	NM_001288960.2	3.99311	2.78247	0.00313161	0.132523
NSDHL	NM_015922.3	1.80881	4.1506	0.00314256	0.13284
ZNF202	NM_003455.4	-8.12271	0.599958	0.00314845	0.132943
GRHPR	NM_012203.2	1.26972	6.8669	0.00315347	0.133009
RBX1	NM_014248.4	1.2683	5.59578	0.00316087	0.133176
S1PR3	NM_005226.4	-1.51204	5.91449	0.00317268	0.133247
TNC	NM_002160.4	-1.7471	9.09778	0.00317679	0.133247
LAMA4	NM_001105206.3	-2.34022	7.73553	0.003177	0.133247
FBLIM1	NM_017556.4	1.1687	7.19724	0.0031792	0.133247
RPL37	NM_000997.5	1.17648	8.72006	0.00318375	0.133247
IMP3	NM_018285.3	1.26893	5.52682	0.00318765	0.133247
TST	NM_001270483.1	-8.14221	0.617937	0.00318803	0.133247
SSNA1	NM_003731.3	1.32727	5.5524	0.00319398	0.133247
KMT5B	NM_001369428.1	-9.15153	1.56189	0.00319907	0.133247
ZKSCAN8	NM_006298.4	-1.80484	4.81456	0.00320571	0.133247
EHBP1	NM_001142616.3	-1.86212	5.64955	0.00320611	0.133247
MAZ	NM_001276275.2	1.38805	6.01497	0.00320709	0.133247
RPL41	NM_001035267.2	1.4805	4.87744	0.00320759	0.133247
TGFBI	NM_000358.3	-1.53934	10.3869	0.00322703	0.13391
LGALS9	NM_002308.4	-4.06881	2.72342	0.00324896	0.134532
EEF1B2	NM_001959.4	1.13598	7.94898	0.00324902	0.134532
STC1	NM_003155.3	-1.84343	5.19043	0.00326212	0.134796
FSD1L	NM_001145313.3	-8.16155	0.635504	0.00326241	0.134796
GTPBP3	NM_001195422.1	-8.07663	0.557957	0.00328498	0.135583
REL	NM_001291746.2	-1.82234	5.41777	0.00329362	0.135794
RPL17	NM_001199341.2	1.81392	4.44991	0.00329897	0.135818
TXNRD1	NM_182742.3	1.27235	5.50848	0.00330127	0.135818
NHSL1	NM_020464.2	-8.40131	0.856291	0.00333745	0.13716
PBRM1	NM_014992.2	8.56912	-0.0655718	0.00335513	0.137636
DAAM1	NM_001366070.2	8.56912	-0.0655718	0.00335618	0.137636
IL6ST	NM_002184.4	-1.71659	8.98185	0.00336747	0.137831
OSBPL3	NM_145322.2	-8.46756	0.917122	0.00337213	0.137831
NFIA	NM_001134673.4	-8.13643	0.612215	0.00337873	0.137831
ZNF532	NM_001321249.1	8.14354	-0.284864	0.00337926	0.137831
VOPP1	NM_001353528.2	8.14354	-0.284864	0.0033796	0.137831
ZNF112	NM_001083335.2	-8.22309	0.691685	0.00338244	0.137831
QKI	NM_206855.3	-2.57058	3.60344	0.00338832	0.137924
EPHA4	NM_004438.5	-3.86582	3.72094	0.0033956	0.137935
CCDC107	NM_001195200.1	1.7557	3.77602	0.00339575	0.137935
NRXN3	NM_001272020.2	7.58231	-0.835298	0.00339951	0.137942
KITLG	NM_000899.5	-1.73002	6.79209	0.00340332	0.137951
PTPRA	NM_080841.2	-8.35439	0.812332	0.00340983	0.138069
PCDH18	NM_019035.5	-1.94109	5.87029	0.00342147	0.138395
RAB32	NM_006834.5	1.15301	6.92687	0.00345301	0.139524
MYL12B	NM_033546.3	1.19112	8.61328	0.00346523	0.139871
KCTD16	NM_001370486.1	-9.19773	1.60589	0.00348745	0.140531
ERCC1	NM_202001.3	2.53002	4.23379	0.00349471	0.140531
RPL24	NM_000986.4	1.10785	8.3091	0.00349755	0.140531
FOXP1	NM_001244815.2	-3.58419	2.87585	0.00349815	0.140531
DGCR6L	NM_033257.4	1.21223	6.01766	0.00349985	0.140531
PDGFRL	NM_001372073.1	-3.33958	3.02338	0.00350807	0.140576
CASP3	NM_001354777.1	-8.08831	0.568766	0.00350829	0.140576
URM1	NM_030914.4	1.19575	6.20227	0.00351723	0.140708
SLC9A3R2	NM_001130012.3	1.2937	5.54229	0.0035189	0.140708
CAPG	NM_001256139.1	1.17705	6.67703	0.00353595	0.141243
RAB11FIP3	NM_014700.4	2.07869	4.16495	0.00355823	0.141965
CCP110	NM_001199022.3	-3.64709	2.54484	0.00356141	0.141965
NDUFA1	NM_004541.4	1.33909	5.06145	0.00357698	0.142439
ZNF532	NM_001353534.2	6.01873	-0.360873	0.00359345	0.142947
MFSD11	NM_024311.4	-8.25124	0.71814	0.00361175	0.143235
SNX11	NM_013323.2	1.43436	4.58015	0.00361359	0.143235
DDX60L	NM_001012967.2	-2.20805	3.80211	0.00361425	0.143235
NFASC	NM_015090.3	8.10335	-0.319114	0.00361755	0.143235
DCXR	NM_016286.4	1.55571	4.44852	0.00361931	0.143235
CCNL2	NM_001320153.3	-1.671	5.68716	0.00362694	0.143389
CSDE1	NM_001242891.1	-3.66058	2.49049	0.00363669	0.143501
TNKS	NM_003747.3	-1.44558	5.6275	0.00363723	0.143501
C1RL	NM_001297643.2	-8.12265	0.599587	0.00365241	0.143952
CUTA	NM_015921.3	1.21946	5.98362	0.00368225	0.14498
RPL21	NM_000982.3	1.10679	8.7487	0.0037024	0.145624
VCAM1	NM_001078.4	-5.55392	3.76571	0.00371479	0.145858
FGD4	NM_001370297.1	7.57534	-0.871349	0.00371595	0.145858
ZNF687	NM_001304764.2	-8.21025	0.680242	0.00372246	0.145911
LPXN	NM_004811.2	1.45831	5.87896	0.00373454	0.145911
BAG5	NM_004873.4	-9.02302	1.43981	0.00373501	0.145911
CTSA	NM_001127695.2	-10.8565	3.21972	0.00373884	0.145911
ERAP2	NM_001130140.2	-9.07921	1.49313	0.00374273	0.145911
RPL15	NM_001253379.2	4.09777	2.01133	0.00374309	0.145911
HAGH	NM_001040427.2	1.64813	3.99865	0.00374384	0.145911
ECI1	NM_001919.4	1.24057	5.40647	0.00375337	0.146134
KRT10	NM_000421.4	1.4088	4.54832	0.00375815	0.146173
RNF146	NM_001242844.1	-4.48036	1.98739	0.00376853	0.14622
C14orf132	NM_001252507.3	-1.80056	6.10786	0.00377834	0.14622
WWTR1	NM_001168278.2	-8.10696	0.585766	0.00378088	0.14622
IGSF10	NM_178822.4	-4.78403	4.92817	0.00378454	0.14622
TRIM6	NM_058166.5	-8.24116	0.708062	0.00378601	0.14622
OSBP2	NM_001178080.2	8.51654	-0.116292	0.00378775	0.14622
AMMECR1L	NM_031445.2	8.51654	-0.116292	0.00378857	0.14622
STAT6	NM_001282739.2	8.51654	-0.116292	0.00378978	0.14622
FNDC3A	NM_001079673.2	-1.6304	4.7401	0.00383454	0.147799
PIN1	NM_006221.3	1.31643	6.25188	0.00385641	0.148483
WTIP	NM_001080436.2	1.22082	5.84199	0.00386001	0.148483
TTC28	NM_001145418.1	-1.65947	5.40307	0.00388066	0.149128
MRPL27	NM_016504.3	1.37173	5.08341	0.00389153	0.149397
LTBP1	NM_000627.3	-1.94824	7.45634	0.00389687	0.149453
GPS1	NM_001330541.2	4.23589	2.15784	0.00390114	0.149467
D2HGDH	NM_001352824.2	-8.00253	0.490505	0.00391526	0.149859
AGRN	NM_198576.4	1.18065	8.55824	0.00394098	0.150577
COX7B	NM_001866.3	1.31112	5.38542	0.00394185	0.150577
MIEN1	NM_032339.5	1.25278	5.27093	0.0039463	0.150598
TCF7L2	NM_030756.5	-8.18634	0.657689	0.00395158	0.15065
DYNLT1	NM_006519.4	1.27301	5.28041	0.00397032	0.151214
LRRC14	NM_001272036.2	-9.16128	1.57203	0.00398077	0.151462
NME1	NM_000269.2	1.54138	6.60967	0.00399195	0.151738
ACAP2	NM_012287.6	-1.49324	5.70376	0.00401823	0.152586
CXorf40A	NM_001171909.3	-8.16802	0.641242	0.00403601	0.15311
SIN3B	NM_001297597.1	-4.80081	1.60277	0.00404454	0.153282
GIPC1	NM_005716.4	1.21404	6.42202	0.00407794	0.154396
GLI3	NM_000168.6	-1.90605	5.61705	0.00409006	0.154702
PSMD8	NM_002812.4	1.20086	7.473	0.00409893	0.154797
SIVA1	NM_006427.4	1.32981	5.65687	0.00410287	0.154797
LCOR	NM_001170765.2	-3.58513	2.66675	0.00410462	0.154797
CHD9	NM_001308319.1	-1.66972	5.05716	0.00411274	0.154801
DST	NM_001144770.1	-3.65898	5.98646	0.00411616	0.154801
POLR1D	NM_015972.4	1.40899	4.58235	0.00411682	0.154801
TRIM16L	NM_001037330.2	1.59534	5.48588	0.00412819	0.155077
PCDHGB3	NM_018924.5	-9.53134	1.92593	0.00414385	0.155514
TNFRSF12A	NM_016639.3	1.5412	7.86033	0.0041489	0.155551
MAP3K13	NM_001242314.2	-7.9728	0.463823	0.00415296	0.155552
EVA1A	NM_001369525.1	3.76113	1.31322	0.00417619	0.156264
GIPC1	NM_202469.3	1.98964	3.37875	0.00418196	0.156264
UBB	NM_018955.4	1.09139	8.69695	0.00418606	0.156264
AGTPBP1	NM_001330701.1	-4.20904	2.46688	0.00419068	0.156264
NUDT16L1	NM_032349.3	1.34959	4.91774	0.00419248	0.156264
IFI44L	NM_006820.4	-4.10713	3.78036	0.00419973	0.156264
MVK	NM_000431.4	1.35792	5.05037	0.00420041	0.156264
CEP57	NM_014679.5	-1.71162	4.39279	0.00420527	0.156289
HMGXB4	NM_001003681.3	-2.39105	3.44966	0.00420919	0.156289
AMOTL2	NM_001278683.1	8.46194	-0.168776	0.00421891	0.156498
BCLAF1	NM_014739.3	-1.59925	5.9554	0.00423613	0.156986
SRGAP1	NM_020762.4	-1.69016	4.66023	0.0042625	0.157677
NPC2	NM_006432.4	1.2053	7.22753	0.00426314	0.157677
TCEAL7	NM_152278.5	-7.97197	0.462844	0.00426708	0.157677
CFB	NM_001710.6	-2.42655	4.85959	0.00427564	0.157842
STAG1	NM_005862.3	-1.38467	5.70118	0.00428309	0.157965
SEPTIN9	NM_001293695.2	-10.7548	3.11965	0.00429602	0.15829
PARP3	NM_001370239.1	1.92155	3.81896	0.00430733	0.158422
LPAR1	NM_001351397.2	-1.95278	4.27402	0.00430783	0.158422
CLMP	NM_024769.5	-1.22852	7.86272	0.00431605	0.158572
PTPA	NM_001271832.1	2.30416	2.92411	0.00432785	0.158854
METTL7A	NM_014033.4	-2.51381	3.97467	0.00433467	0.158953
FAM13B	NM_016603.3	-1.57175	4.98498	0.00434331	0.159118
IFT80	NM_001190242.1	-3.91403	2.84583	0.00435993	0.159575
RNF41	NM_001242826.1	-8.07921	0.560154	0.00436652	0.159664
NEDD1	NM_001135177.2	-8.13392	0.610573	0.00439204	0.160445
ZDHHC16	NM_198043.2	1.73863	3.60152	0.00439899	0.160461
GMIP	NM_001288998.2	-8.0321	0.517673	0.00440081	0.160461
ROCK2	NM_001321643.2	-9.29963	1.70391	0.00441161	0.160702
SF3B1	NM_001308824.1	-2.13882	4.43284	0.0044183	0.160793
GMEB1	NM_024482.3	-8.93449	1.35597	0.00442702	0.160959
HFE	NM_139006.3	-9.09711	1.51046	0.00443159	0.160973
RPL10	NM_001256577.2	2.15442	2.75081	0.00444832	0.161335
MCRIP1	NM_001093767.3	1.74778	3.60153	0.00445228	0.161335
RPL10A	NM_007104.5	1.07814	9.10316	0.00445416	0.161335
MMAB	NM_052845.4	1.39388	4.70168	0.00446894	0.161685
SNED1	NM_001080437.3	-3.0502	5.04903	0.00447223	0.161685
EIF5	NM_001969.5	-1.253	7.31378	0.00451322	0.16299
SETX	NM_015046.7	-1.51597	5.69498	0.0045168	0.16299
JTB	NM_006694.4	1.10267	7.04476	0.0045299	0.16331
TMSB10	NM_021103.4	1.10151	10.4226	0.00453759	0.163316
ZNF287	NM_001346167.1	-8.04848	0.532106	0.00453856	0.163316
IGF2	NM_001007139.5	-9.31658	1.7195	0.00454946	0.163555
BCL2L13	NM_001270729.1	-8.06243	0.544982	0.00456294	0.163614
TBC1D5	NM_001349090.1	-8.2066	0.676203	0.00456366	0.163614
PHC3	NM_024947.4	-1.57245	5.07005	0.00456386	0.163614
SERPINE2	NM_006216.3	-1.46941	5.89809	0.00457992	0.164037
MXRA7	NM_198530.4	1.12909	7.93666	0.00458649	0.164119
TFPT	NM_001321792.1	2.44533	2.65346	0.00459265	0.164187
TRIM22	NM_001199573.2	-8.13802	0.613724	0.00461146	0.164706
TMBIM1	NM_022152.6	1.10687	7.91285	0.00462475	0.164856
FLCN	NM_001353230.2	-8.11337	0.590973	0.00462562	0.164856
TAGLN	NM_001001522.2	1.73317	4.47928	0.00463133	0.164856
PCDH18	NM_001300828.2	-1.69916	7.15765	0.00463279	0.164856
NME3	NM_002513.2	1.34383	4.81274	0.00465511	0.165497
NAA38	NM_032356.5	2.16136	2.71189	0.00466242	0.165604
TMEM263	NM_001319666.1	-4.13792	1.98122	0.00468072	0.165874
RBM26	NM_001286632.1	-2.12986	3.74031	0.00468126	0.165874
SRSF2	NM_003016.4	-1.95648	3.86691	0.00468296	0.165874
TNS1	NM_022648.6	1.88041	3.68945	0.0046942	0.16612
ZNF670	NM_033213.5	-7.94272	0.436524	0.00470815	0.166364
CD83	NM_004233.4	-8.9907	1.4089	0.00470975	0.166364
IFIT1	NM_001548.5	-2.74656	4.66843	0.00471423	0.166369
HNRNPD	NM_031370.3	-4.55531	1.37866	0.00472316	0.166416
ACOX1	NM_001185039.2	-8.13678	0.612619	0.00472421	0.166416
USP25	NM_001283042.3	-7.92922	0.424248	0.00473459	0.166629
ATP5F1E	NM_006886.4	1.1312	6.72117	0.00476347	0.167492
CSGALNACT1	NM_001354492.1	-8.17503	0.647324	0.00477392	0.167706
EMC6	NM_031298.4	1.36648	4.82087	0.00479033	0.167716
IRAK3	NM_007199.3	-1.97627	4.68008	0.00479458	0.167716
RPS25	NM_001028.3	1.08246	8.18945	0.00479919	0.167716
RGS14	NM_001371177.1	8.40525	-0.223145	0.00479971	0.167716
ANXA2	NM_004039.3	1.16481	11.6231	0.00480141	0.167716
MGAT1	NM_001364386.2	8.40525	-0.223145	0.00480193	0.167716
NRCAM	NM_006480.5	8.40525	-0.223145	0.00480471	0.167716
TPGS1	NM_033513.3	1.30557	4.87965	0.00481502	0.167923
COL5A3	NM_015719.4	1.39347	6.20931	0.00482144	0.167987
LATS1	NM_001350339.2	-8.07615	0.557163	0.00482557	0.167987
DLG1	NM_001366206.1	-8.14308	0.61853	0.00483309	0.168096
USF2	NM_207291.3	1.85253	3.30005	0.00483929	0.16816
RUNX1T1	NM_001198633.1	-4.07912	2.38125	0.00487232	0.169031
GSTM1	NM_000561.4	-10.5214	2.89004	0.0048768	0.169031
ITPA	NM_033453.4	1.25193	5.4661	0.00488114	0.169031
ZBTB38	NM_001080412.3	-1.49357	5.58337	0.00488276	0.169031
C7orf50	NM_032350.5	1.41627	5.87535	0.00488752	0.169031
RUNX2	NM_001278478.2	-3.23011	3.51742	0.00489188	0.169031
EEF1G	NM_001404.5	1.07113	10.5672	0.00490356	0.169031
ZNF397	NM_001135178.3	-2.45663	3.42407	0.00490403	0.169031
NRBP1	NM_001321358.2	-9.34993	1.75154	0.00490638	0.169031
TMEM256	NM_152766.5	1.49451	4.16099	0.00491043	0.169031
PFN1	NM_005022.4	1.2366	10.4803	0.00491271	0.169031
FN1	NM_001306132.1	1.42258	8.6742	0.00492182	0.169194
KANSL1	NM_001193466.2	-8.18342	0.655891	0.00493386	0.169316
WDCP	NM_001142319.1	-7.94434	0.438212	0.00493418	0.169316
FBN2	NM_001999.4	-1.74518	10.6454	0.00494984	0.169702
TLK2	NM_006852.4	-1.87539	4.1608	0.0049904	0.17094
H2AC19	NM_001040874.1	2.00969	2.99714	0.00500123	0.171035
H2AC18	NM_003516.2	2.00969	2.99714	0.00500207	0.171035
SELENOP	NM_005410.4	-2.75926	3.24389	0.00501803	0.171429
RPL32	NM_001007073.1	1.97628	3.23271	0.00503709	0.171927
DOK4	NM_018110.5	1.72172	4.7667	0.00505515	0.17239
PIK3CA	NM_006218.4	-1.43673	5.14969	0.00506259	0.172491
SDHC	NM_003001.3	1.12371	6.61411	0.00508075	0.172957
RPS6KA1	NM_001330441.2	7.6346	-0.897171	0.00511076	0.173824
REX1BD	NM_001100419.1	1.93851	3.13245	0.00511716	0.173888
VPS13B	NM_152564.4	-1.88228	5.77633	0.00512668	0.174058
NABP1	NM_001031716.4	-1.50758	5.11786	0.00514244	0.174439
JUNB	NM_002229.3	1.16736	6.11987	0.00516432	0.175027
TMCC1	NM_001349264.2	-4.56259	1.38255	0.00518101	0.17541
ITSN2	NM_001348186.2	-3.6886	2.50777	0.00518473	0.17541
LYPD6B	NM_001317003.1	2.86035	1.86507	0.00520572	0.175965
SLC25A27	NM_004277.5	-8.26272	0.727674	0.00521236	0.176035
SUGCT	NM_001267810.1	7.93028	-0.464983	0.00523527	0.176378
SHC1	NM_183001.5	1.15816	7.45988	0.00523606	0.176378
EIF6	NM_024728.2	7.93028	-0.464983	0.00523627	0.176378
FUT8	NM_178155.3	-3.28114	3.56275	0.00528703	0.177932
POLI	NM_001351632.2	-6.6781	1.74615	0.005296	0.17799
MRPS21	NM_031901.5	1.34836	4.6335	0.00530678	0.17799
TTC14	NM_001042601.3	-2.21055	3.71915	0.00531574	0.17799
SMIM26	NM_001348958.1	1.56449	3.98551	0.00531752	0.17799
RAD52	NM_001297419.1	-7.9149	0.411519	0.00531992	0.17799
DENND3	NM_014957.5	-7.98779	0.477346	0.00532093	0.17799
MTLN	NM_001355251.2	1.5439	4.1191	0.00532115	0.17799
PRDM5	NM_001300823.1	6.42827	-0.633162	0.00534547	0.178648
CD151	NM_001039490.1	1.38753	5.3544	0.00535369	0.178768
TRIP11	NM_004239.4	-1.63531	5.12741	0.00537281	0.179251
ZKSCAN7	NM_018651.4	-8.03167	0.516671	0.00538603	0.179536
SOCS5	NM_144949.3	-1.45408	5.20654	0.00541451	0.180169
SPHK1	NM_001142601.2	1.77624	5.39618	0.00542321	0.180169
CENPE	NM_001286734.2	-4.02523	3.22192	0.00542397	0.180169
DAPK3	NM_001348.3	1.0922	7.25886	0.00542778	0.180169
SDF2	NM_006923.4	1.22477	5.25708	0.00543391	0.180169
ILK	NM_001014794.3	1.07865	7.41482	0.00543742	0.180169
RNF19A	NM_015435.4	-8.00775	0.495024	0.00544193	0.180169
SNAPC3	NM_001369649.2	-8.8886	1.31227	0.0054425	0.180169
TPM1	NM_001018006.2	1.56301	8.59346	0.00545451	0.180412
LAMB1	NM_002291.3	-1.65903	8.86127	0.00547163	0.180822
AOPEP	NM_032823.5	1.60055	4.55562	0.00549427	0.181415
TCF7L2	NM_001278122.2	8.34628	-0.279533	0.00552253	0.181792
PRPF4B	NM_003913.5	-1.3595	5.74344	0.00552531	0.181792
ZKSCAN8	NM_001198530.1	8.34629	-0.279533	0.00552786	0.181792
CEP70	NM_024491.4	-7.92905	0.423953	0.00552892	0.181792
ZNF570	NM_001321992.2	-8.30779	0.76933	0.00553847	0.181792
ANKHD1-EIF4EBP3	NM_020690.5	-1.45299	4.99782	0.00554006	0.181792
DVL1	NM_004421.3	1.14976	6.33369	0.00554141	0.181792
TRIM16	NM_001348121.1	2.07529	3.98956	0.00554351	0.181792
SRSF11	NM_001350615.2	-2.9149	3.05738	0.00555782	0.18193
NDUFS7	NM_024407.5	1.21745	5.50113	0.00556185	0.18193
PRPSAP2	NM_001353102.2	-5.57513	0.736944	0.00556507	0.18193
RASA2	NM_006506.5	-2.32504	4.26364	0.00556664	0.18193
USP34	NM_014709.4	-1.40143	6.73162	0.00558207	0.18228
AHR	NM_001621.5	-1.44133	7.12782	0.00558806	0.18232
CAST	NM_001330628.2	-2.16311	3.59635	0.00559816	0.182495
POU2F2	NM_001247994.2	-9.05338	1.46875	0.00562264	0.183138
PDLIM4	NM_001131027.1	1.57873	3.94911	0.00563146	0.18327
ZNF33B	NM_001305035.2	-3.58914	2.60584	0.00565208	0.183786
PARK7	NM_001123377.1	1.18218	6.86882	0.00570303	0.185286
PDGFRA	NM_001347830.1	-2.59094	3.06971	0.00572473	0.185811
GOLGB1	NM_001256488.1	-10.3481	2.7202	0.00572886	0.185811
HSPB2	NM_001541.4	2.0111	3.09738	0.0057376	0.185938
BUB1	NM_001278616.1	6.86041	-0.15787	0.00575014	0.186187
YIF1A	NM_020470.3	1.13147	6.54785	0.00577399	0.18668
MAF1	NM_032272.5	1.07813	6.8297	0.00577507	0.18668
TIMM17B	NM_005834.5	1.49691	4.36082	0.00578014	0.186687
DST	NM_001144769.3	-1.4181	6.37932	0.00580045	0.187186
CXCL6	NM_002993.4	-7.16789	3.81739	0.00580866	0.187294
LSM14A	NM_001114093.2	-1.69178	4.24668	0.00586544	0.188948
BCAP31	NM_001256447.2	1.07835	6.98441	0.00586977	0.188948
PIK3R1	NM_181523.3	-1.53595	5.26894	0.00590168	0.189651
ANKRD17	NM_198889.3	-1.42713	5.03637	0.00590284	0.189651
USP8	NM_005154.5	-1.87614	4.12699	0.00590702	0.189651
SLC11A2	NM_000617.3	-3.61254	3.38961	0.00591134	0.189651
ZNF135	NM_001289401.1	-7.92848	0.423708	0.00591857	0.189725
FAM241A	NM_152400.3	-1.61982	5.59145	0.00593617	0.19013
ELN	NM_001081753.3	-8.91142	1.33438	0.00595114	0.190451
ABHD17A	NM_001130111.2	1.08176	6.82176	0.00595806	0.190514
SLC25A39	NM_016016.3	1.20218	6.09835	0.00597421	0.190872
MAP3K2	NM_001371910.2	-1.49255	5.1023	0.00599291	0.191311
CAPG	NM_001747.4	1.88093	5.52656	0.00601185	0.191756
RANBP2	NM_006267.5	-1.31412	6.21466	0.00604913	0.192536
PCMTD1	NM_001286782.1	-7.97288	0.463498	0.00605267	0.192536
CTBP2	NM_001321014.2	7.85964	-0.523777	0.00605344	0.192536
GUCY1A2	NM_000855.3	-3.63247	2.87172	0.00605632	0.192536
ZNF875	NM_001329763.1	7.32243	-1.06457	0.0060624	0.19257
SLC4A2	NM_001199693.1	-8.35287	0.81175	0.00610113	0.19364
IBTK	NM_015525.4	-1.43725	5.75009	0.00613614	0.194591
ZNF655	NM_001085368.1	-9.49183	1.88806	0.00616265	0.195271
FBH1	NM_032807.4	-8.00633	0.494542	0.00617671	0.195555
ZMYM2	NM_003453.5	-8.82906	1.25658	0.00618458	0.195643
IKZF2	NM_001371275.1	-7.94383	0.43736	0.00619505	0.195814
FUOM	NM_001098483.3	1.90294	3.30526	0.00621727	0.1961
MAN2A1	NM_002372.3	-1.41434	6.35514	0.00621899	0.1961
POSTN	NM_001286665.2	1.78836	4.36412	0.00621941	0.1961
RPS26	NM_001029.5	1.25001	7.88146	0.00622697	0.196138
MCAM	NM_006500.3	2.30117	5.70246	0.00623213	0.196138
SELENOK	NM_021237.5	1.306	4.62294	0.0062359	0.196138
GYPC	NM_002101.5	1.28031	6.552	0.00624766	0.196347
NRP1	NM_001024628.2	-1.57025	4.80027	0.00625741	0.196493
MPC2	NM_015415.3	1.49791	4.47386	0.00627309	0.196671
USP24	NM_015306.3	-1.26989	6.15933	0.0062764	0.196671
BOK	NM_032515.5	1.25682	5.79614	0.00627841	0.196671
AKAP13	NM_001270546.1	-2.37104	3.52411	0.00630121	0.197224
MFSD6	NM_017694.4	-1.82688	4.22345	0.00631556	0.197483
PCID2	NM_001371293.1	8.28478	-0.338087	0.00632177	0.197483
ZDHHC4	NM_001353092.2	8.28479	-0.338087	0.00632644	0.197483
ZEB1	NM_001128128.2	-9.35483	1.75611	0.00633	0.197483
FGD4	NM_001304480.1	-8.74739	1.17912	0.00634212	0.197696
PPIP5K1	NM_001354388.1	6.6089	0.101545	0.00634954	0.197696
TPCN1	NM_017901.6	1.234	5.55736	0.00635224	0.197696
PHF5A	NM_032758.4	1.35834	4.70216	0.00638589	0.198582
VKORC1	NM_024006.6	1.13407	6.83844	0.00639122	0.198587
ARID4B	NM_016374.6	-1.74454	4.18372	0.00640182	0.198677
TBC1D4	NM_001286659.2	-1.71161	4.80077	0.00640747	0.198677
RHOBTB3	NM_014899.4	-1.41889	7.89824	0.00641121	0.198677
CHD6	NM_032221.5	-1.4569	5.43935	0.00642412	0.198677
MYO9A	NM_006901.4	-1.41152	5.03846	0.00642681	0.198677
ADH1B	NM_000668.6	-10.1696	2.54549	0.00642684	0.198677
EREG	NM_001432.3	-4.77162	2.11507	0.00643251	0.198677
HSD17B10	NM_004493.3	1.28773	5.45386	0.00643544	0.198677
BRK1	NM_018462.5	1.04109	7.42852	0.00644468	0.198803
UQCC3	NM_001085372.3	1.46752	4.26987	0.00647651	0.199625
PTPRN	NM_001199763.2	-8.85324	1.27967	0.00650365	0.200301
RNF150	NM_020724.2	-1.60202	6.41691	0.00654427	0.201244
GOSR1	NM_001007024.2	-7.90794	0.405066	0.00654768	0.201244
DSEL	NM_032160.3	-1.15401	8.32484	0.00654995	0.201244
TMEM14C	NM_016462.4	1.07528	6.87269	0.00655716	0.201287
PCYT2	NM_002861.5	1.16133	6.52514	0.00656973	0.201287
ZBED6	NM_001174108.2	-1.93396	4.48465	0.00657485	0.201287
UBC	NM_021009.7	1.02609	9.98337	0.00657751	0.201287
ZNF37A	NM_001324251.2	-8.76593	1.19646	0.00658167	0.201287
KAT6B	NM_001370140.1	-3.44493	2.87604	0.00659466	0.201287
UBR2	NM_015255.2	-2.59788	3.45475	0.00660359	0.201287
U2SURP	NM_001320220.2	-7.87119	0.371905	0.00660607	0.201287
KMT2A	NM_001197104.1	-3.46353	4.04316	0.00660742	0.201287
APCDD1	NM_153000.5	-2.20779	7.3654	0.00660863	0.201287
ETS1	NM_001162422.1	-8.13855	0.614457	0.00660984	0.201287
RAF1	NM_001354690.2	1.79409	3.85648	0.00662227	0.201287
ERBIN	NM_001006600.2	-1.30231	6.00338	0.00662416	0.201287
NAXE	NM_144772.3	1.19428	5.50532	0.00662461	0.201287
TMEM54	NM_033504.4	1.27471	4.89339	0.00663569	0.201464
PDK1	NM_002610.5	-2.51959	3.0248	0.006654	0.201861
COL4A2	NM_001846.4	1.20128	9.30483	0.00666411	0.202008
TRADD	NM_003789.4	1.21024	5.01878	0.00668014	0.202335
RALGPS2	NM_001286247.1	-1.42888	6.39248	0.00669268	0.202356
SMC2	NM_001265602.1	-7.85703	0.359241	0.00670117	0.202356
EIF4E	NM_001130678.3	-8.72651	1.15943	0.00670538	0.202356
ALDH4A1	NM_003748.4	1.37876	4.94286	0.00670704	0.202356
C6orf89	NM_001286636.2	-7.84711	0.350472	0.00671043	0.202356
SH3KBP1	NM_001024666.3	-3.48851	2.87026	0.00671242	0.202356
PAX3	NM_181457.4	7.28278	-1.04234	0.00673243	0.202801
POMGNT1	NM_017739.3	1.14523	6.61044	0.0067478	0.203105
TMEM117	NM_001286211.1	-7.80044	0.308543	0.00676152	0.203358
EDA2R	NM_001324202.2	-7.97369	0.464046	0.00677838	0.203706
SMARCAD1	NM_020159.5	-3.12548	3.44169	0.00679669	0.204097
PPP3CA	NM_001130691.2	-1.31584	5.66565	0.00680918	0.204313
CACNA1C	NM_001129830.3	-8.77596	1.20614	0.00681862	0.204353
TEAD1	NM_021961.6	-1.24726	8.0968	0.00682114	0.204353
RHOBTB1	NM_001350905.2	-8.85137	1.27733	0.00683401	0.204579
ZNF286A	NM_001130842.2	-8.33662	0.795622	0.00684783	0.204833
TPGS2	NM_001271956.1	1.64137	4.33026	0.00685811	0.204981
PAQR3	NM_001040202.2	-1.41786	5.44092	0.00690267	0.206089
MXRA8	NM_001282582.1	-1.2571	6.25312	0.0069066	0.206089
CHD2	NM_001271.4	-1.31464	6.08095	0.00691124	0.206089
TXN	NM_003329.4	1.15741	7.93932	0.00692442	0.206252
RGS3	NM_144489.3	1.17599	5.98338	0.00693553	0.206252
COPZ1	NM_016057.3	1.05555	7.06178	0.00693874	0.206252
ANAPC11	NM_001002247.2	1.54113	3.8387	0.00694232	0.206252
CCDC124	NM_001136203.2	1.18218	6.06238	0.00694685	0.206252
PDE5A	NM_033437.3	-2.23246	3.75337	0.00694951	0.206252
NFIC	NM_001245002.2	-2.47971	4.70736	0.00695424	0.206252
RPS9	NM_001321706.2	1.68464	3.78467	0.00696304	0.206354
NSD3	NM_023034.2	-1.45976	5.27999	0.00696974	0.206393
FN1	NM_001365523.1	1.31975	7.8194	0.00697774	0.206471
B3GAT3	NM_012200.4	1.16528	5.34675	0.00700125	0.206886
GADD45GIP1	NM_052850.4	1.12952	6.68692	0.00701173	0.206886
CEP83	NM_001368038.1	7.31319	-1.11346	0.00701321	0.206886
DDHD1	NM_001160148.2	-2.19598	3.23274	0.00701326	0.206886
USO1	NM_001290049.1	-7.7832	0.293041	0.00703894	0.207191
SMG1	NM_015092.4	-1.25132	7.10254	0.00704323	0.207191
TGOLN2	NM_001206844.2	-1.31599	5.43047	0.00704541	0.207191
CASP8	NM_001372051.1	-8.50001	0.947324	0.00705119	0.207191
CDK5RAP2	NM_018249.6	-1.5846	5.19313	0.00705892	0.207191
ZNF248	NM_001352472.1	-8.72426	1.15714	0.00705943	0.207191
RPAP2	NM_024813.3	-1.64488	4.88757	0.00706132	0.207191
IVNS1ABP	NM_006469.5	-1.5359	4.88527	0.00706884	0.207219
MSRB2	NM_012228.4	1.29828	4.59158	0.00707305	0.207219
GPD2	NM_000408.5	-1.54554	4.86608	0.00708369	0.207247
TBL2	NM_001362660.2	-4.33927	1.43846	0.00708841	0.207247
SRSF1	NM_001078166.2	-2.18226	3.28135	0.00709015	0.207247
PUM1	NM_014676.3	-1.43686	5.12136	0.00710584	0.207548
PRR5L	NM_001160167.2	-8.87397	1.29804	0.00714355	0.208386
VCAN	NM_001164097.1	-1.41945	7.70877	0.00715064	0.208386
TMEM205	NM_001145416.2	1.32926	4.48091	0.0071508	0.208386
RFWD3	NM_001370534.1	-8.91492	1.33786	0.0071769	0.208988
PGAM4	NM_001029891.3	-3.74219	1.523	0.00720229	0.209569
RAB34	NM_031934.6	1.12385	6.25872	0.00721923	0.209903
LPIN1	NM_001349206.2	-2.24229	3.31756	0.0072299	0.210055
GNG5	NM_005274.3	1.19638	5.90672	0.00723626	0.210081
HMBS	NM_000190.4	1.40808	4.67029	0.00724225	0.210096
BDNF	NM_001709.5	-1.52817	5.03182	0.00724987	0.210159
TNFSF9	NM_003811.4	2.06028	3.11523	0.00726806	0.210275
COX7A2L	NM_001319036.1	1.10732	6.16405	0.00726886	0.210275
TMEM9	NM_016456.4	1.13054	5.63856	0.00727029	0.210275
ATP6V0C	NM_001694.4	1.11532	7.30835	0.00727579	0.210276
PTDSS2	NM_001329544.2	-7.85464	0.357274	0.00728949	0.210514
SPATA13	NM_001286794.1	-8.7638	1.19465	0.00730885	0.210915
JMJD1C	NM_001318153.2	-8.73199	1.1643	0.00733443	0.211494
EEA1	NM_003566.4	-1.35758	5.67477	0.00736045	0.21205
SMC2	NM_001042551.2	-8.96277	1.38334	0.00736889	0.21205
PPP4R2	NM_001318026.1	-8.87475	1.29915	0.00737073	0.21205
IGF2BP2	NM_001291873.2	-8.76686	1.19782	0.00737576	0.21205
FDPS	NM_001135822.2	1.30006	6.78489	0.00740096	0.212384
COL6A3	NM_004369.4	-1.64419	9.0912	0.00740161	0.212384
THRB	NM_000461.5	-4.14537	2.43091	0.00740392	0.212384
SIPA1L2	NM_020808.4	-2.03465	5.42234	0.00743542	0.213128
NAA10	NM_003491.4	1.15432	5.82607	0.00744637	0.213249
RALGAPA1	NM_001346248.2	-8.84368	1.26939	0.00745776	0.213249
MRPL53	NM_053050.5	1.24022	4.88349	0.00746106	0.213249
TRPM7	NM_001301212.2	-1.90314	4.10458	0.00746181	0.213249
UEVLD	NM_001261385.2	-7.83719	0.341557	0.0074986	0.214142
TMEM183A	NM_138391.6	1.16459	5.60344	0.00751405	0.214424
ACBD5	NM_001042473.4	-7.95249	0.44473	0.00752148	0.214476
ATAT1	NM_001318763.2	-4.86304	0.846806	0.00755857	0.215374
SP3	NM_003111.4	-1.38833	5.71677	0.00756496	0.215397
SEPTIN10	NM_001321512.2	-1.60982	5.01189	0.00757835	0.215619
ZNF75A	NM_001352495.1	7.42376	-1.07239	0.00759563	0.215834
SETBP1	NM_015559.3	-2.45705	4.25736	0.00760549	0.215834
STARD13	NM_001243474.1	-7.7759	0.286455	0.00760816	0.215834
ZNF83	NM_001348015.1	-8.66896	1.10537	0.00761334	0.215834
KIAA1841	NM_001330436.1	7.19719	-1.15279	0.00761398	0.215834
NENF	NM_013349.5	1.18045	5.44877	0.00763084	0.216153
POSTN	NM_001330517.2	7.327	-1.12246	0.00764176	0.216283
DNMBP	NM_001318327.1	-7.7806	0.29092	0.00764668	0.216283
TMED9	NM_017510.6	1.03166	8.3273	0.00766732	0.216566
PBRM1	NM_001350076.2	-3.97205	1.6756	0.00766988	0.216566
MICOS10	NM_001032363.4	1.14821	5.78895	0.00767358	0.216566
GPRASP1	NM_014710.5	-8.72527	1.15822	0.00768766	0.216699
NDUFA6	NM_002490.6	1.17209	5.63631	0.00769056	0.216699
UVSSA	NM_001317934.2	-3.58342	2.1877	0.00769694	0.216699
PSMA5	NM_002790.4	1.13159	6.29567	0.00770473	0.216699
HGF	NM_000601.6	-3.51009	3.80048	0.00771028	0.216699
VPS26A	NM_001035260.2	-7.74882	0.262703	0.00771207	0.216699
NF1	NM_001042492.3	-1.25478	6.08362	0.00772481	0.216898
UFL1	NM_015323.5	-1.51519	4.7535	0.00775897	0.217392
CD109	NM_133493.5	-1.19279	7.45641	0.00776787	0.217392
MPDU1	NM_004870.4	1.20323	5.72491	0.00777689	0.217392
IGFL4	NM_001002923.2	-2.54221	3.47461	0.0077799	0.217392
ITGA2	NM_002203.4	-1.78069	4.11981	0.00778181	0.217392
MXD1	NM_002357.4	-3.97478	1.67737	0.007784	0.217392
UQCRC1	NM_003365.3	1.0809	7.80503	0.00779124	0.217392
CDC42EP5	NM_145057.4	1.32034	5.80708	0.00779626	0.217392
SHISA4	NM_198149.2	1.14552	5.60758	0.00780253	0.217392
PHACTR1	NM_001354215.1	7.70714	-0.649193	0.00781211	0.217392
DBNDD2	NM_001322309.2	7.70714	-0.649193	0.00781499	0.217392
GPX7	NM_015696.5	1.50683	3.95409	0.00781567	0.217392
EHBP1	NM_001048224.2	7.70714	-0.649193	0.00781588	0.217392
TCAF1	NM_014719.3	-1.24236	6.64877	0.00787408	0.218853
STAG2	NM_006603.5	-1.39039	5.46825	0.00789153	0.219179
ZNF772	NM_001024596.3	-7.9626	0.454005	0.00791428	0.219413
P2RY1	NM_002563.5	-5.47686	1.85846	0.007917	0.219413
SEC31A	NM_001318120.1	-3.12781	3.34284	0.00791886	0.219413
PAM	NM_001364588.2	7.54694	-0.989461	0.00792274	0.219413
FNDC3B	NM_022763.4	-1.27561	6.59952	0.00794464	0.219861
VPS52	NM_001289175.1	-7.94752	0.441237	0.00795664	0.219915
DMPK	NM_001288766.2	1.33869	5.34792	0.00795803	0.219915
BCAR1	NM_014567.5	1.39742	5.94602	0.00798391	0.22023
CSRP2	NM_001321.3	1.4622	4.02457	0.00799149	0.22023
RPL7A	NM_000972.3	0.998101	10.1399	0.00799223	0.22023
SLU7	NM_001364522.2	-7.8462	0.349325	0.00799232	0.22023
ZNF3	NM_001362775.2	-7.90901	0.405669	0.00800712	0.220438
MRPL17	NM_022061.4	1.23225	5.75389	0.00801134	0.220438
ZNF511	NM_145806.4	1.3221	4.55025	0.00806494	0.221754
C9orf16	NM_024112.4	1.18361	5.23133	0.00809201	0.22234
IL7	NM_000880.4	-7.82345	0.328956	0.00812397	0.223058
CACHD1	NM_020925.4	-2.15451	4.62118	0.00815619	0.223529
MBOAT2	NM_001321266.2	-7.75611	0.269284	0.00815656	0.223529
REV3L	NM_001372078.1	-1.9944	6.03199	0.00815853	0.223529
EXOSC4	NM_019037.3	1.39147	4.35081	0.00817051	0.223698
TFPI	NM_001329240.2	7.68007	-0.671214	0.0082013	0.224017
EPSTI1	NM_001331228.2	-8.53641	0.981591	0.00820253	0.224017
SMCHD1	NM_015295.2	-1.40303	5.22071	0.00820347	0.224017
HECTD1	NM_015382.4	-1.20718	6.88015	0.00821124	0.224017
PARVB	NM_013327.4	1.36313	5.71869	0.00821129	0.224017
SLC44A1	NM_080546.5	-1.48922	5.46822	0.00822321	0.224183
ACAN	NM_001369268.1	4.51714	1.60236	0.00823673	0.224236
ARL2	NM_001667.4	1.07786	6.37022	0.00823683	0.224236
SLC52A2	NM_001363121.2	2.10255	2.59814	0.00832835	0.226499
WASHC2C	NM_001367395.1	-7.82516	0.331146	0.00834281	0.226499
ZNF326	NM_182976.4	-1.7288	4.05466	0.00834507	0.226499
FAM229B	NM_001033564.3	1.63909	3.71716	0.00834541	0.226499
TSPAN11	NM_001370302.1	-10.0821	2.46009	0.00835423	0.226499
LSM7	NM_016199.3	1.19867	5.07057	0.00835527	0.226499
MGAT4B	NM_054013.3	-2.08239	3.39145	0.00837768	0.226947
SHC3	NM_016848.6	-2.26015	5.12776	0.00839732	0.227218
VEGFB	NM_003377.5	1.16903	5.92392	0.00839951	0.227218
KLF2	NM_016270.4	1.58496	4.84138	0.00840593	0.227232
DLG1	NM_001366214.1	-1.80965	3.9671	0.0084184	0.227409
TSPAN33	NM_178562.5	-5.10397	1.05695	0.00843402	0.227551
LYRM1	NM_001371862.1	8.15338	-0.462359	0.00844883	0.227551
LIFR	NM_001323042.1	8.15339	-0.462359	0.00845454	0.227551
DGKH	NM_001297429.2	8.15339	-0.462359	0.00845463	0.227551
GPATCH11	NM_002310.6	8.15339	-0.462359	0.00845787	0.227551
PHTF1	NM_001369635.1	8.15339	-0.462359	0.00845915	0.227551
ZNF787	NM_001002836.4	1.16637	5.41501	0.00847917	0.227727
KAT6A	NM_006766.5	-1.30437	5.51626	0.0084836	0.227727
USP33	NM_201626.3	-2.30816	3.06522	0.00848509	0.227727
F2R	NM_001992.5	-1.1328	7.8645	0.00849144	0.227727
MFAP4	NM_002404.3	-2.77097	6.94524	0.0084953	0.227727
SQSTM1	NM_003900.5	1.34843	10.3323	0.00850197	0.227747
LYPD6B	NM_001317005.1	5.45307	-0.401295	0.00852135	0.228108
RIPOR3	NM_001290268.2	-2.40609	5.26099	0.00853864	0.228201
HELLS	NM_001289068.2	-8.25046	0.717782	0.00854677	0.228201
SMARCA5	NM_003601.4	-1.2689	6.25403	0.00854697	0.228201
PTMS	NM_002824.6	1.006	8.39577	0.00855067	0.228201
C12orf57	NM_138425.4	1.24925	5.68871	0.00855449	0.228201
DYNLRB1	NM_014183.3	1.05203	6.39125	0.00856997	0.228455
KLHDC3	NM_057161.4	1.07238	6.37317	0.0085826	0.228634
TP53I11	NM_001258323.3	-7.82714	0.332006	0.00859033	0.228681
ARL6IP4	NM_001278379.1	1.17446	5.6638	0.00860503	0.228751
TSPAN17	NM_130465.5	1.15095	5.92867	0.00860924	0.228751
NUP50	NM_007172.4	-1.44424	5.27814	0.00861143	0.228751
TSHZ2	NM_173485.6	-4.32828	1.82708	0.00862158	0.228751
EIF1	NM_005801.4	1.00511	8.71438	0.00862267	0.228751
TRAF1	NM_001324141.1	7.65247	-0.693582	0.00863284	0.228818
ZNF41	NM_001190947.1	7.65247	-0.693582	0.00863857	0.228818
RASSF8	NM_001164747.2	-3.09142	4.87375	0.00864306	0.228818
BRMS1	NM_015399.4	1.19219	5.42693	0.00866651	0.229281
STUB1	NM_005861.4	1.05706	7.12701	0.00868453	0.229556
ZNF100	NM_001351669.2	-7.82616	0.331665	0.00869354	0.229556
ERBB2	NM_001005862.2	-8.17033	0.64357	0.0086948	0.229556
ANKRD28	NM_001349282.2	-8.63273	1.07148	0.00872835	0.230149
MBOAT2	NM_001321267.2	-7.69945	0.218831	0.00872924	0.230149
PHF3	NM_001290259.2	-8.57247	1.015	0.0087721	0.230596
NR4A2	NM_006186.4	-7.70613	0.22465	0.00877244	0.230596
BANF1	NM_003860.4	1.20392	6.32853	0.00877311	0.230596
SENP6	NM_015571.4	-1.61828	4.97974	0.0087757	0.230596
ZNF764	NM_033410.4	-7.73961	0.254301	0.00877617	0.230596
MYH10	NM_005964.4	-1.32919	6.11449	0.00884168	0.232159
SLC8A1	NM_001112801.3	-8.02957	0.515893	0.00885688	0.232399
PCID2	NM_001353094.2	5.39038	-0.215956	0.0088732	0.232669
CSTB	NM_000100.3	1.1269	6.87411	0.00891116	0.233505
CAV1	NM_001172897.2	1.74509	3.2265	0.00892884	0.233713
SESN3	NM_144665.4	-2.28186	5.14158	0.00893123	0.233713
ADAMTS9	NM_182920.2	-3.71473	3.07054	0.00894671	0.233958
GSPT1	NM_001130007.2	-7.71422	0.231708	0.00897097	0.234434
ARHGEF12	NM_015313.3	-1.23096	5.84985	0.00898565	0.234658
NTMT1	NM_014064.3	1.34272	5.15191	0.00899886	0.234714
ADRA1D	NM_000678.4	1.85439	3.94348	0.00900151	0.234714
FBXO44	NM_183413.2	1.7245	3.51873	0.00901181	0.234714
ELOVL2	NM_017770.4	-2.63661	3.46266	0.00901222	0.234714
CDC25B	NM_001287519.1	-9.87179	2.25559	0.0090259	0.234867
PCBD1	NM_001323004.2	3.61638	0.33277	0.00903197	0.234867
CCDC149	NM_173463.5	-7.95662	0.448357	0.00903799	0.234867
C11orf54	NM_001286069.2	7.13162	-1.23173	0.0090445	0.234867
GUCY1B1	NM_000857.4	-3.54918	2.91915	0.00905124	0.234867
EDA	NM_001005609.2	7.62436	-0.716308	0.00906324	0.234867
COG4	NM_001365426.1	-8.58063	1.02287	0.00906424	0.234867
KLHDC8B	NM_173546.3	1.25166	4.76967	0.00906694	0.234867
GOLGB1	NM_001256486.2	-3.72912	3.47856	0.00911754	0.236019
PMS2	NM_001322003.2	-8.76901	1.20004	0.0091281	0.23605
PLCXD1	NM_018390.4	-8.64363	1.0813	0.00913143	0.23605
FYCO1	NM_024513.4	-1.24429	6.81965	0.00913944	0.23605
PKP3	NM_007183.4	-8.56883	1.01208	0.00914327	0.23605
HIPK3	NM_001048200.3	-1.42203	5.16903	0.00917214	0.236636
DIRAS3	NM_004675.4	-5.47627	1.87249	0.00918852	0.2369
TAF1B	NM_001318977.1	-7.71505	0.232641	0.009203	0.237114
POLR2F	NM_021974.5	1.25977	4.91835	0.0092099	0.237133
MGA	NM_001164273.1	-1.77144	4.34987	0.00924316	0.237797
CFL1	NM_005507.3	1.10518	10.2906	0.00924805	0.237797
FDX2	NM_001031734.4	1.30306	4.53126	0.0092716	0.238165
GABBR1	NM_021903.2	-2.77653	2.59968	0.00927473	0.238165
ZDHHC20	NM_153251.3	-1.46393	5.35669	0.00928356	0.238233
NDUFC2	NM_004549.6	1.10641	6.0046	0.00930366	0.238589
ZNF148	NM_001348425.2	-8.53035	0.975889	0.00931359	0.238685
MRPS34	NM_023936.2	1.12071	6.0811	0.00932937	0.238812
WDR92	NM_001256476.2	-7.66879	0.191542	0.00933098	0.238812
ZNF691	NM_015911.3	-7.70465	0.222986	0.00934783	0.239007
ATP6V0C	NM_001198569.1	-2.73708	2.50686	0.009351	0.239007
PKIG	NM_007066.5	1.19424	5.04181	0.0093679	0.239207
RNF5	NM_006913.4	1.19487	5.15007	0.00937129	0.239207
COMMD7	NM_053041.2	1.17276	5.93181	0.0093872	0.239454
KIT	NM_000222.2	-8.6201	1.0601	0.00939845	0.239583
NDUFS8	NM_002496.4	1.10875	6.15066	0.0094215	0.240011
AJUBA	NM_032876.6	1.05144	7.36926	0.00943297	0.240048
PITX1	NM_002653.5	-5.3531	4.12026	0.00943543	0.240048
UBA52	NM_001033930.3	0.991139	7.8516	0.0094656	0.240293
TOMM6	NM_001134493.1	1.26123	4.76498	0.00946852	0.240293
SYNGR2	NM_001320523.2	1.85912	3.24063	0.00947234	0.240293
COPZ2	NM_016429.4	1.13111	5.66607	0.00948356	0.240293
GPAT4	NM_001363198.2	-7.74667	0.260829	0.00948543	0.240293
EVI5L	NM_001159944.3	1.20543	5.01832	0.00948769	0.240293
MRPL23	NM_021134.4	1.1121	5.73358	0.00949457	0.240293
EIF6	NM_181468.2	1.27163	5.07511	0.00949502	0.240293
SCG5	NM_003020.4	3.85335	0.836943	0.00951644	0.240529
ASH1L	NM_018489.3	-1.26914	5.99636	0.00951687	0.240529
TOP2B	NM_001068.3	-1.23455	6.11664	0.00954884	0.241092
SEC61G	NM_014302.4	1.13196	5.93692	0.00955165	0.241092
APOL6	NM_030641.4	-1.45374	5.81622	0.0095746	0.241507
FAM126A	NM_001363466.2	-1.33255	7.33994	0.00958675	0.241507
NUDT2	NM_147173.3	1.32795	4.39437	0.00958693	0.241507
AGPAT2	NM_006412.4	1.11647	5.73054	0.00960676	0.241697
PHF3	NM_001370350.2	-7.88707	0.386259	0.00961024	0.241697
CUTA	NM_001014840.2	1.20918	5.0524	0.00961333	0.241697
RBFOX2	NM_001082576.3	-1.36863	5.70396	0.00962867	0.241924
MRPL20	NM_017971.4	1.1603	5.73963	0.00964014	0.242012
ECPAS	NM_001363756.1	-1.30699	5.97209	0.00964475	0.242012
MRPL33	NM_145330.2	1.71652	3.21105	0.00965412	0.242089
TRIM16	NM_006470.4	1.13075	6.0809	0.00966561	0.242211
SLC35B3	NM_001142540.1	-7.95395	0.447115	0.00967157	0.242211
NRIP1	NM_003489.4	-1.42471	4.93149	0.00969288	0.242587
CD82	NM_002231.4	1.26874	6.21454	0.0096992	0.242587
CLIP1	NM_198240.2	-1.17051	6.65686	0.00972328	0.243031
RPS6KB2	NM_003952.3	1.15626	5.79268	0.00974402	0.243392
MIB1	NM_020774.3	-1.2611	5.67873	0.00977214	0.243936
MDN1	NM_014611.3	-1.23777	5.61492	0.0097803	0.243981
ZBTB25	NM_001354684.2	-7.75464	0.267231	0.00980995	0.244562
PRPF40A	NM_001354431.2	-3.05399	3.48489	0.00983034	0.244912
TMEM106C	NM_024056.3	1.25442	4.57291	0.00988432	0.245251
SERTAD1	NM_013376.4	1.36909	4.47948	0.00988878	0.245251
RFLNA	NM_001365156.1	3.2262	4.22709	0.00989762	0.245251
KLF7	NM_001321740.2	8.08288	-0.528459	0.00989785	0.245251
ZNF286A	NM_001270944.1	8.08288	-0.528459	0.00989857	0.245251
ATP6V0E2	NM_139158.2	8.08288	-0.528459	0.00989965	0.245251
CDK15	NM_001367795.1	8.08288	-0.528459	0.00990314	0.245251
TTC26	NM_001282677.2	8.08288	-0.528459	0.00990343	0.245251
DMRTA2	NM_032110.3	8.08288	-0.528459	0.0099052	0.245251
PEX1	NM_001288649.2	8.08288	-0.528459	0.00990769	0.245251
PLA2R1	NM_007366.5	-2.76151	3.91714	0.00992067	0.245373
PIKFYVE	NM_015040.4	-1.39022	5.25451	0.0099254	0.245373
PGAP3	NM_001291728.1	-7.82657	0.331659	0.00995121	0.245547
LRRC58	NM_001099678.2	-1.28027	5.51189	0.00995371	0.245547
TTC23	NM_001353869.2	-8.52429	0.969969	0.00995392	0.245547
TOM1L2	NM_001350332.2	7.56645	-0.762879	0.00995798	0.245547
HDAC7	NM_015401.5	-10.0955	2.47352	0.0099657	0.24558
GVQW3	NM_001305225.3	-3.56184	1.75299	0.00997864	0.245742
ANKRD1	NM_014391.2	3.70405	0.560446	0.00998829	0.245822
NXF1	NM_001081491.2	-1.62121	4.7263	0.0100261	0.246532
ZNF333	NM_001352244.2	-7.79562	0.304118	0.01003	0.246532
UQCRH	NM_006004.4	1.04837	6.25814	0.0100528	0.246855
ATP11C	NM_001353810.2	-3.22247	2.83287	0.0100568	0.246855
CC2D2A	NM_001080522.2	-1.73043	4.09689	0.0100623	0.246855
CCNDBP1	NM_012142.5	1.11052	5.85101	0.0100857	0.247269
NR1D2	NM_001145425.1	-8.50992	0.957632	0.010099	0.247311
RCAN2	NM_005822.3	-9.07803	1.49149	0.0101011	0.247311
NFIX	NM_001271043.2	-2.09783	4.02747	0.0101066	0.247311
MDK	NM_002391.5	1.18421	5.63018	0.010114	0.247333
CHCHD1	NM_203298.3	1.25075	4.74463	0.0101289	0.247398
EIF2AK2	NM_001135651.3	-1.33256	6.32639	0.0101295	0.247398
DDA1	NM_024050.6	1.10614	5.78977	0.0101424	0.247449
ARFGEF1	NM_006421.5	-1.28138	5.7458	0.0101555	0.247449
SERF1A	NM_021967.2	7.53657	-0.786751	0.0101572	0.247449
LMCD1	NM_001278235.2	1.95907	2.95074	0.0101573	0.247449
ETV1	NM_004956.5	-3.48055	3.34761	0.0101643	0.247461
BRD2	NM_001291986.2	-1.36666	5.00145	0.0101776	0.247526
BIVM-ERCC5	NM_001204425.1	-8.47644	0.925691	0.0101798	0.247526
SULT1B1	NM_014465.4	-1.86277	3.99838	0.0101925	0.247677
POSTN	NM_001135935.1	1.7193	4.92158	0.010199	0.247681
PPP4R3B	NM_001282850.2	-1.61069	4.576	0.0102063	0.247701
CCDC85B	NM_006848.3	1.00343	7.36981	0.0102314	0.248153
MRPL21	NM_181514.2	1.3204	4.49521	0.0102426	0.248268
STIL	NM_001048166.1	-8.94787	1.36937	0.0102518	0.248292
POGLUT3	NM_153705.5	-1.17697	6.57262	0.0102565	0.248292
B4GALT2	NM_003780.4	1.03251	6.93507	0.0102734	0.248542
ZNF25	NM_145011.4	-3.29329	2.97038	0.0102797	0.248542
PTGS1	NM_000962.4	-2.10409	6.28408	0.0103002	0.24888
GABPA	NM_002040.4	-2.03642	3.60276	0.0103104	0.248972
FABP3	NM_004102.5	2.00076	4.57286	0.0103301	0.249289
MED23	NM_004830.4	-1.42715	4.60216	0.0103476	0.249556
ZSCAN29	NM_152455.3	-8.56846	1.0111	0.010376	0.249954
TIAF1	NM_004740.3	-7.68019	0.201049	0.0103771	0.249954
RBM48	NM_001363366.1	7.10517	-1.28013	0.0104073	0.250399
FKBP8	NM_001308373.2	1.03167	6.91638	0.0104086	0.250399
ANO6	NM_001025356.3	-1.33261	6.10347	0.0104198	0.250511
OTUD6B	NM_001286745.2	-7.77386	0.284245	0.0104491	0.251058
SNX17	NM_014748.4	0.974094	7.7376	0.0104638	0.251254
SIN3A	NM_001145358.2	-1.28264	5.24124	0.010472	0.251296
MLST8	NM_001352060.2	4.41895	1.51701	0.0105076	0.251992
PDZRN3	NM_001303141.1	-8.46929	0.918747	0.0105254	0.252262
TYMP	NM_001953.5	1.51228	5.05833	0.0105476	0.252485
ACVR1	NM_001105.5	7.50616	-0.811031	0.0105478	0.252485
DOCK1	NM_001290223.1	-1.74475	4.45834	0.010607	0.253743
VMP1	NM_001329395.2	-2.77907	2.32388	0.0106472	0.254547
RPS16	NM_001321111.2	1.7335	3.30888	0.0106633	0.254772
IDE	NM_001322793.1	-3.96263	2.04458	0.0107081	0.255393
DEPDC1	NM_001114120.3	-8.88344	1.30843	0.0107082	0.255393
FER	NM_005246.4	-1.80268	4.25498	0.0107149	0.255393
ASPH	NM_032466.4	-1.43751	6.28483	0.0107217	0.255393
ANKRD36	NM_001354587.1	-3.0113	2.33967	0.0107224	0.255393
CLIP1	NM_001247997.1	-7.65731	0.181176	0.0107543	0.255808
RPL19	NM_000981.4	0.961311	9.73991	0.0107675	0.255808
CYP20A1	NM_001371698.1	-7.57051	0.104522	0.0107733	0.255808
CCDC85A	NM_001348516.1	-8.58575	1.02728	0.0107778	0.255808
ALDH1A3	NM_001293815.2	-7.75638	0.26952	0.0107865	0.255808
LAMTOR1	NM_017907.3	1.03634	6.65112	0.0107885	0.255808
RTF1	NM_015138.4	-1.19105	5.92134	0.0107919	0.255808
BRD9	NM_001009877.2	-7.58764	0.119528	0.0108	0.255808
NCOA2	NM_006540.4	-1.47569	4.78692	0.010801	0.255808
ZEB1	NM_001323646.2	-8.58022	1.02285	0.0108064	0.255808
SLC39A14	NM_001135153.3	3.21049	1.96642	0.010825	0.256091
RALGPS2	NM_152663.5	-2.97221	4.374	0.0108438	0.25636
MANBAL	NM_001003897.2	1.39453	4.22063	0.0108497	0.25636
ATR	NM_001184.4	-1.48305	4.35589	0.0108607	0.25641
PHF20L1	NM_001362971.1	-1.44105	4.66098	0.0108671	0.25641
AZIN1	NM_001363083.1	-7.70619	0.224293	0.0108718	0.25641
KDM5C	NM_001282622.2	-8.97906	1.39735	0.0108922	0.256735
NFKBIE	NM_004556.3	1.47845	3.94891	0.0109083	0.256956
SLC25A35	NM_001320870.2	-7.57658	0.109971	0.0109317	0.257351
FAM91A1	NM_001317917.2	-7.67992	0.200812	0.0109515	0.257659
SGSM3	NM_001350041.2	2.96957	1.82431	0.0109681	0.257752
ABCA6	NM_080284.3	-4.32772	2.41034	0.0109689	0.257752
THOC2	NM_001081550.2	-1.37343	5.09433	0.0109756	0.257752
FANCL	NM_001114636.1	-7.7325	0.248479	0.0109954	0.258059
RPSA	NM_001304288.2	2.6293	1.64447	0.0110232	0.258555
PPL	NM_002705.5	-3.58419	4.59635	0.0110389	0.258632
PCNT	NM_001315529.2	-2.08262	3.51517	0.0110399	0.258632
ST3GAL4	NM_001348400.2	1.80331	3.18678	0.0110559	0.258847
ZFX	NM_001330327.2	-3.97974	1.50947	0.0110716	0.259059
TMX3	NM_019022.5	-1.20986	6.50184	0.0110932	0.259405
C12orf4	NM_001346157.1	7.17688	-1.26698	0.0111491	0.260555
AASS	NM_005763.4	-1.73205	4.07169	0.0111742	0.26085
ZNF593	NM_015871.5	1.34521	4.26053	0.0111813	0.26085
TRIP12	NM_004238.3	2.05351	2.6163	0.0111821	0.26085
RPS7	NM_001011.4	0.971846	8.69735	0.0112214	0.261608
NETO1	NM_138966.5	-9.16619	1.57534	0.0112313	0.26168
ZNF33A	NM_001278175.2	-8.4604	0.910619	0.0112411	0.261751
JOSD2	NM_001270639.1	1.16604	4.90627	0.0112582	0.26186
COX15	NM_001372025.1	-7.95505	0.446741	0.0112794	0.26186
RBAK	NM_021163.4	-2.03816	3.38903	0.0112884	0.26186
TRAPPC4	NM_016146.6	1.2016	4.87068	0.0112987	0.26186
SLC25A6	NM_001636.4	0.966649	9.31758	0.0113094	0.26186
SMUG1	NM_001330444.2	8.00872	-0.597493	0.0113145	0.26186
XPC	NM_001031695.4	8.00872	-0.597493	0.0113176	0.26186
STS	NM_001320753.1	8.00872	-0.597493	0.0113218	0.26186
RBFOX2	NM_001351252.1	8.00872	-0.597493	0.0113274	0.26186
MTA3	NM_001354726.1	8.00873	-0.597493	0.0113312	0.26186
PDLIM4	NM_003687.4	1.07332	6.25454	0.0113377	0.26186
ACIN1	NM_014977.3	-9.69234	2.08162	0.0113392	0.26186
ARID5B	NM_001244638.2	-1.36692	6.23566	0.0113432	0.26186
WNT5A	NM_003392.4	-1.28706	8.58321	0.0113506	0.26186
TBC1D7	NM_001143966.3	2.38305	1.79858	0.0113547	0.26186
KRR1	NM_007043.7	-1.44488	4.55267	0.0113547	0.26186
SF3B1	NM_012433.3	-1.16119	7.5949	0.0113908	0.262534
ATXN7	NM_001177387.1	-3.46805	3.0067	0.0114384	0.263474
ZNF189	NM_001278240.1	-7.88902	0.387992	0.0114539	0.263674
VPS28	NM_016208.4	1.0868	5.63409	0.0114726	0.263902
HERC6	NM_017912.3	-2.65578	3.75621	0.011484	0.263902
PGR	NM_001202474.3	-7.86165	0.363099	0.0114844	0.263902
BIRC2	NM_001166.4	-1.23354	5.37428	0.0115023	0.264155
NTNG1	NM_001372166.1	6.98771	-1.33013	0.0115138	0.264209
UBQLN1	NM_053067.3	-1.6225	4.59274	0.0115184	0.264209
PSME1	NM_006263.4	1.03867	6.82926	0.0115318	0.264235
PARP14	NM_017554.3	-1.52365	6.00988	0.0115333	0.264235
PBRM1	NM_001350075.2	-1.68823	4.21882	0.011555	0.264574
POP1	NM_001145861.2	-7.84294	0.347011	0.0115635	0.264612
AKAP12	NM_144497.2	-2.92074	4.18592	0.0116072	0.265152
NIN	NM_020921.3	-1.23563	5.58258	0.0116079	0.265152
NR1H3	NM_005693.4	-4.11644	1.44335	0.0116144	0.265152
SRGAP2	NM_015326.4	-1.51243	5.14756	0.0116147	0.265152
IRAK4	NM_001351343.1	-7.70523	0.224302	0.0116216	0.265152
TMED1	NM_006858.4	1.07875	5.50678	0.0116498	0.265638
MET	NM_001324401.2	-7.68194	0.203215	0.0116677	0.265889
RBM4	NM_002896.3	1.06183	5.85221	0.0116963	0.266385
PSMD13	NM_002817.4	1.03314	6.84031	0.0117187	0.266582
DNAJC13	NM_015268.4	-1.13771	6.69932	0.0117247	0.266582
CNOT8	NM_001301080.2	-7.67983	0.20138	0.0117258	0.266582
UBL5	NM_024292.4	1.95276	2.63612	0.0117328	0.266583
KRIT1	NM_001350684.1	-7.57967	0.112649	0.0117631	0.266965
DIPK2A	NM_173552.5	-1.69885	4.43974	0.0117691	0.266965
RBM45	NM_001365579.1	-7.61443	0.142899	0.0117704	0.266965
COX8A	NM_004074.3	1.09006	6.93149	0.0118049	0.267589
BAK1	NM_001188.4	1.166	5.12686	0.0118146	0.267644
SPIDR	NM_001352940.1	-7.58188	0.114538	0.0118212	0.267644
WDR48	NM_001346228.1	-7.52265	0.0626324	0.0118291	0.267666
PBRM1	NM_001366076.2	-7.60316	0.133371	0.011848	0.267803
RPL14	NM_001034996.3	-1.37083	5.59865	0.0118491	0.267803
KDM4C	NM_001353997.2	-7.61623	0.145144	0.0118729	0.268183
MAP1LC3A	NM_032514.4	1.28429	4.82545	0.0118858	0.268316
YAP1	NM_001195045.2	-7.57631	0.109519	0.0119106	0.268718
PARK7	NM_007262.5	1.03399	6.2165	0.0119353	0.269119
KEAP1	NM_012289.4	1.10227	5.55918	0.0119592	0.269498
ZEB1	NM_001323641.2	-3.16022	3.26769	0.0119698	0.269579
POLL	NM_013274.3	-8.42822	0.880678	0.0119768	0.269579
FAM122B	NM_001331088.1	-7.66232	0.186172	0.0119853	0.269612
LAMTOR2	NM_014017.4	1.14691	4.90181	0.0120003	0.269701
LRPPRC	NM_133259.4	-1.15754	6.25082	0.0120066	0.269701
ARL6IP4	NM_001002251.2	1.1307	5.2078	0.0120235	0.269701
TUSC2	NM_007275.2	1.1984	4.61714	0.0120242	0.269701
LRRC8C	NM_032270.5	-1.64618	4.35934	0.0120243	0.269701
SGSM3	NM_001350040.2	4.59212	0.805914	0.0120392	0.269767
CTSB	NM_147783.4	2.00326	3.00498	0.0120412	0.269767
SOS1	NM_005633.3	-1.45467	5.26558	0.012058	0.269805
SCN2A	NM_021007.3	-8.61719	1.05725	0.0120637	0.269805
JUND	NM_005354.6	1.07943	5.8492	0.0120688	0.269805
JUND	NM_001286968.2	1.07943	5.8492	0.012071	0.269805
COPS6	NM_006833.5	1.07497	7.15283	0.0120953	0.269966
PNPLA6	NM_001166111.2	-7.62616	0.153729	0.0120959	0.269966
RPS6KB1	NM_001272060.1	-1.46644	4.41018	0.0121078	0.269966
HAS3	NM_001199280.2	2.74669	2.60694	0.0121158	0.269966
RGL3	NM_001035223.4	-8.05343	0.536277	0.0121161	0.269966
METAP2	NM_006838.4	-1.19471	5.60268	0.0121203	0.269966
CANX	NM_001363995.1	-8.41625	0.869647	0.0121359	0.270005
SSR2	NM_003145.4	0.950325	7.72385	0.0121361	0.270005
BTBD1	NM_001011885.2	-7.66962	0.192494	0.0121454	0.270057
CCDC82	NM_001363594.1	-4.82171	0.797016	0.0121784	0.270625
ITGB8	NM_002214.3	-2.32507	3.98944	0.012185	0.270625
FBXO44	NM_001304791.2	7.07886	-1.33205	0.0122065	0.270944
IFT43	NM_001102564.1	1.44502	3.97407	0.0122186	0.270965
CITED2	NM_006079.5	1.06716	8.32279	0.0122271	0.270965
SYTL2	NM_001365834.1	-7.57041	0.104437	0.0122286	0.270965
HMCN1	NM_031935.3	-2.8597	4.542	0.0122461	0.271125
CYB5R1	NM_016243.3	1.0728	5.48812	0.0122525	0.271125
CLK1	NM_004071.4	-1.71556	4.28798	0.0122603	0.271125
MCRS1	NM_006337.5	1.07487	5.81199	0.012264	0.271125
TPD52L1	NM_001003397.3	2.63761	1.55986	0.0122725	0.271157
PNRC2	NM_017761.4	-1.24641	5.40701	0.0122898	0.271346
COMMD5	NM_014066.4	1.39392	4.05298	0.0122951	0.271346
POGZ	NM_207171.2	-2.50472	3.84256	0.0123145	0.271541
PCBD1	NM_000281.4	1.19429	4.7257	0.0123181	0.271541
PTGS1	NM_080591.3	-4.4589	3.26332	0.0123455	0.27199
EFEMP2	NM_016938.5	0.978517	8.43989	0.0123939	0.272901
CMKLR1	NM_001142345.1	5.45959	-0.861427	0.0124112	0.273041
RPS6KC1	NM_012424.6	-1.64472	4.19161	0.0124192	0.273041
RBPJ	NM_203284.2	-1.25575	5.5968	0.0124216	0.273041
SUPT5H	NM_001319991.2	-9.02216	1.43959	0.0124393	0.273274
SLC4A2	NM_003040.4	0.971231	7.81148	0.0124467	0.27328
IFI16	NM_005531.3	-1.16114	6.27714	0.0124859	0.273835
TP53I13	NM_138349.4	1.07114	5.73352	0.0124862	0.273835
APOD	NM_001647.4	-4.99147	4.0401	0.0124941	0.273853
KHDRBS1	NM_006559.3	-1.21248	6.83802	0.012561	0.275075
WDR83OS	NM_016145.4	1.02605	6.04857	0.0125642	0.275075
KLF4	NM_004235.6	-2.3101	4.01488	0.0125971	0.275509
PARP9	NM_001146102.2	-3.55159	2.22347	0.0125983	0.275509
GDF5	NM_000557.5	1.90036	3.84412	0.0126134	0.275682
NDUFAF3	NM_199069.2	1.17216	5.56343	0.0126541	0.276415
RNF6	NM_183043.2	-1.95809	3.79058	0.012664	0.276474
MKLN1	NM_013255.5	-1.31541	5.50718	0.0126997	0.27648
SMARCA1	NM_001282874.2	-1.28284	5.26207	0.0127004	0.27648
NECAP2	NM_018090.5	0.997577	6.40998	0.0127025	0.27648
EPB41L2	NM_001350304.1	-1.51398	4.816	0.0127113	0.27648
CCPG1	NM_004748.5	-2.68958	2.62986	0.0127145	0.27648
ZNF66	NM_001355197.2	-2.01968	3.59053	0.0127148	0.27648
POLD2	NM_006230.3	1.2322	6.42063	0.0127184	0.27648
ANK2	NM_001354249.1	-3.77087	1.74959	0.0127242	0.27648
ZC3H11A	NM_001319238.1	-3.0155	4.37826	0.012729	0.27648
BPTF	NM_004459.7	-1.37744	5.17462	0.0127498	0.276644
ZNF738	NM_001355241.2	-7.59288	0.124495	0.0127509	0.276644
SREK1	NM_001077199.3	-1.4126	4.64094	0.0127642	0.276776
XAF1	NM_001353136.2	-4.27243	1.57833	0.0127717	0.276782
IPO8	NM_001190995.1	-7.52321	0.0631112	0.0127824	0.276848
GLMP	NM_001256605.1	1.56626	3.58157	0.0128104	0.276848
CCN5	NM_003881.3	-3.74045	3.17587	0.0128199	0.276848
DDX31	NM_001322342.1	-8.46461	0.915184	0.0128314	0.276848
PRRC2C	NM_015172.4	-1.08164	7.12641	0.0128336	0.276848
EIF5B	NM_015904.4	-1.16187	6.24456	0.0128338	0.276848
IAH1	NM_001039613.3	1.06276	5.60567	0.0128362	0.276848
BEX1	NM_018476.4	1.47367	6.22005	0.0128457	0.276848
RAD17	NM_133344.3	-7.64985	0.174673	0.0128504	0.276848
TRPC6	NM_004621.6	-2.55575	3.12983	0.0128606	0.276848
LUZP1	NM_033631.4	-1.73309	4.7682	0.0128622	0.276848
CDC42EP1	NM_152243.3	0.981526	6.96039	0.0128625	0.276848
TJP2	NM_004817.4	-1.42277	5.27272	0.0128786	0.276848
CAPN7	NM_014296.3	-1.37397	4.71927	0.012885	0.276848
SPTBN1	NM_178313.2	-1.0713	6.97094	0.0128862	0.276848
CASP10	NM_032977.4	-4.69466	1.52153	0.0129129	0.276848
MMP17	NM_016155.7	1.14224	5.66279	0.012922	0.276848
EYA4	NM_172103.3	7.93054	-0.669711	0.0129424	0.276848
PC	NM_001281712.2	7.93054	-0.669711	0.0129426	0.276848
XRN1	NM_019001.5	-3.2753	2.24583	0.0129436	0.276848
CSDE1	NM_001130523.3	7.93054	-0.669711	0.0129465	0.276848
BCR	NM_022172.3	7.93054	-0.669711	0.0129468	0.276848
NCAPH	NM_021574.3	7.93054	-0.669711	0.012947	0.276848
PARP8	NM_001178056.2	7.93054	-0.669711	0.0129475	0.276848
YEATS2	NM_001351369.1	-8.34896	0.80829	0.0129971	0.277755
GOLM1	NM_016548.4	-1.19794	5.78199	0.0130135	0.277851
KIAA0753	NM_001351225.2	-7.67102	0.193039	0.0130182	0.277851
MIER3	NM_001297599.1	-2.99295	3.10831	0.0130233	0.277851
ACKR3	NM_020311.3	-3.78772	2.56781	0.0130349	0.277946
GABARAPL2	NM_007285.7	1.0467	5.73325	0.0130427	0.277957
KRIT1	NM_001350690.1	-7.65023	0.17527	0.0130617	0.278209
ILVBL	NM_006844.5	1.04756	5.93809	0.0130736	0.278308
FTO	NM_001363988.1	-8.36215	0.820505	0.013095	0.27861
KPNA5	NM_001366306.2	-1.85151	4.44563	0.0131283	0.279164
COBLL1	NM_001365670.2	7.37715	-0.912531	0.0131537	0.279446
KIAA1191	NM_001079685.2	-4.08068	1.75547	0.0131573	0.279446
RANBP10	NM_001320239.2	-3.6643	1.52506	0.0131634	0.279446
TST	NM_003312.6	1.25348	4.3471	0.0131727	0.27949
CD151	NM_139029.1	1.06633	6.25573	0.0131972	0.279739
SYTL2	NM_032943.4	-1.78252	3.96853	0.013199	0.279739
RUSC1	NM_001105203.2	-2.11799	3.47789	0.0132185	0.279999
IL13RA1	NM_001560.3	-1.17078	6.41366	0.0132471	0.280448
TCF4	NM_001330604.3	-7.79793	0.305883	0.0132621	0.280613
TNXB	NM_001365276.2	-9.80117	2.18678	0.013278	0.280776
TMEM11	NM_003876.2	1.23339	4.66875	0.0132892	0.280776
FAM156B	NM_001321178.1	-1.52096	4.43148	0.0132917	0.280776
ZNF219	NM_016423.3	1.41991	4.75196	0.0133006	0.280801
ELF2	NM_201999.3	-3.55748	1.98051	0.0133075	0.280801
CLTA	NM_001833.4	0.9985	7.73534	0.0133155	0.280814
KLHL24	NM_017644.3	-3.51959	3.27864	0.013357	0.281536
PNKD	NM_001077399.3	1.15203	4.81313	0.0133974	0.282233
CCN4	NM_001204869.2	-7.62964	0.156479	0.0134435	0.28305
HNRNPR	NM_001102397.3	-1.19978	6.06757	0.013466	0.283245
TCF12	NM_001322158.2	-3.54434	1.77496	0.0134747	0.283245
NRXN2	NM_138732.3	1.94942	4.07007	0.0134749	0.283245
GOLGA8A	NM_181077.4	-3.26289	2.39969	0.0134949	0.283511
JAK2	NM_001322195.1	6.97418	-1.39861	0.013506	0.283589
HDLBP	NM_001320965.2	-1.11896	7.8002	0.0135361	0.284049
GBP2	NM_004120.5	-1.50417	5.13863	0.0135449	0.284049
TAP2	NM_001290043.1	-1.61018	4.47189	0.01355	0.284049
ZNF419	NM_001098495.2	-7.5576	0.0933909	0.013559	0.284082
ZMYM4	NM_005095.3	-1.40033	4.96517	0.0135721	0.284114
ZNF605	NM_183238.4	-3.086	3.13473	0.0135753	0.284114
DHPS	NM_001930.4	1.16027	5.05996	0.0135921	0.284192
OSR1	NM_145260.3	-1.36576	5.31651	0.0135938	0.284192
DNAJB14	NM_001031723.4	-1.37307	4.90328	0.0136135	0.284214
DDR2	NM_006182.4	-1.23036	8.41533	0.0136176	0.284214
SLC39A14	NM_001351657.2	-7.76901	0.280617	0.0136249	0.284214
CCDC180	NM_020893.4	-4.45778	0.92917	0.0136352	0.284214
CYREN	NM_001305629.1	-7.56303	0.097578	0.0136381	0.284214
UBB	NM_001281720.1	-3.23533	3.25655	0.0136392	0.284214
S100A4	NM_002961.3	1.24424	9.45285	0.013657	0.28443
PARP9	NM_001146105.2	-1.44604	4.68509	0.0136788	0.284627
CDC42BPA	NM_001366011.1	-8.41048	0.864584	0.0136837	0.284627
ADD3	NM_001121.4	-1.29404	5.62488	0.0136902	0.284627
PMM1	NM_002676.3	1.05433	5.93861	0.013696	0.284627
CSAD	NM_015989.5	-8.31035	0.772161	0.0137429	0.28543
SGMS2	NM_001136257.1	-5.24223	2.23863	0.0137599	0.28543
MID1	NM_000381.4	-1.25626	5.13662	0.0137614	0.28543
ARF5	NM_001662.4	0.973028	6.83072	0.0137744	0.28543
ZFC3H1	NM_144982.5	-1.2782	5.53997	0.0137777	0.28543
ASH2L	NM_001261832.1	-8.3314	0.79173	0.0137792	0.28543
MPHOSPH8	NM_017520.4	-1.30352	4.88987	0.0138345	0.286219
HAX1	NM_001018837.2	1.97985	2.50184	0.0138359	0.286219
DBNDD2	NM_001048221.2	3.64709	0.480146	0.0138464	0.286219
SHC1	NM_001130040.2	0.967925	8.32661	0.0138514	0.286219
NT5DC2	NM_001134231.2	1.10497	6.98134	0.0138697	0.286219
SH3BP5	NM_004844.5	-1.32334	5.48055	0.0138741	0.286219
CLCN3	NM_001829.4	-1.32625	5.06668	0.0138758	0.286219
OCIAD2	NM_152398.3	2.00151	2.43384	0.0139012	0.286219
ENTPD1	NM_001370190.1	7.34302	-0.939083	0.0139022	0.286219
LRRC32	NM_001164179.2	7.34301	-0.939083	0.0139058	0.286219
DMXL1	NM_005509.6	-1.3985	4.62792	0.013909	0.286219
CPLANE1	NM_023073.3	-1.58197	4.41912	0.0139121	0.286219
TUBB6	NM_001303529.2	1.46741	3.81866	0.0139169	0.286219
LTBP1	NM_001166266.1	-1.66558	4.16536	0.0139224	0.286219
NPIPB5	NM_001135865.1	-1.76563	3.76752	0.0139289	0.286219
BTN3A2	NM_001197246.2	-7.61118	0.139819	0.0139536	0.286574
NIN	NM_182946.1	-1.50949	4.27343	0.01397	0.286648
HLTF	NM_001318934.1	-3.1711	2.99511	0.013982	0.286648
CAMKK2	NM_153500.1	2.51654	2.28157	0.0140007	0.286648
SLF2	NM_018121.4	-1.42984	4.41548	0.0140008	0.286648
SGSM3	NM_001350047.2	2.56016	1.31813	0.0140012	0.286648
PRADC1	NM_032319.3	1.48555	3.94461	0.0140019	0.286648
ADI1	NM_018269.4	0.961812	6.66332	0.0140383	0.287047
RPS24	NM_033022.4	0.943793	8.04416	0.0140404	0.287047
GFM1	NM_001308164.1	-7.49089	0.034936	0.0140556	0.287047
NME6	NM_001308430.1	-8.03882	0.522552	0.0140644	0.287047
BAZ1B	NM_001370402.1	-1.08768	6.73906	0.0140727	0.287047
AKAP11	NM_016248.4	-1.19906	5.63524	0.0140732	0.287047
SCRN1	NM_001145513.1	-9.50389	1.90063	0.0140766	0.287047
CNIH4	NM_001277200.2	1.31231	4.13011	0.0140811	0.287047
ITIH3	NM_002217.3	4.83397	-0.312423	0.0140977	0.287233
SMIM7	NM_024104.3	1.07377	5.59074	0.0141124	0.28738
KLHL13	NM_001168303.1	-3.05019	2.36592	0.0141306	0.287556
CHD8	NM_001170629.2	-1.18393	5.59768	0.0141396	0.287556
WARS1	NM_213645.2	1.4562	4.58186	0.0141435	0.287556
SATB1	NM_001195470.3	-7.58654	0.118543	0.0141572	0.287683
LAMA4	NM_001105207.3	-1.46567	7.52135	0.0141696	0.287783
SAMHD1	NM_001363729.2	-1.57046	5.09664	0.0141775	0.287793
SCN9A	NM_002977.3	-1.80332	3.76044	0.0142125	0.288322
HEATR1	NM_018072.6	-1.20138	5.6746	0.0142186	0.288322
LPAR1	NM_001351401.2	-8.48375	0.933311	0.0142443	0.28869
KLF7	NM_003709.4	-1.33267	4.96491	0.0142568	0.288791
TASOR	NM_001112736.2	-1.35309	4.85481	0.0142718	0.28885
BLVRB	NM_000713.3	1.10193	5.71309	0.0142791	0.28885
OTUB1	NM_017670.2	0.994542	6.23364	0.0142822	0.28885
C19orf12	NM_001282929.1	-7.6271	0.153799	0.0142959	0.288975
NUP133	NM_018230.3	-1.23684	5.19725	0.0143241	0.289129
RPS6	NM_001010.3	0.920937	9.72464	0.0143296	0.289129
OARD1	NM_001329685.1	-7.43798	-0.0112772	0.0143379	0.289129
KCNK15	NM_022358.4	-3.96759	1.72106	0.0143392	0.289129
RHOBTB1	NM_001350911.2	-7.61277	0.141179	0.0143411	0.289129
HDAC9	NM_001321895.2	6.91065	-1.42428	0.0144081	0.290328
IFITM3	NM_021034.3	1.12096	9.04051	0.0144307	0.290467
NBPF14	NM_015383.2	-1.16638	6.40855	0.0144342	0.290467
PEG10	NM_001172438.3	-3.26918	3.04906	0.0144376	0.290467
SLC16A7	NM_001270623.2	-1.64551	5.39236	0.0144586	0.290598
ST6GALNAC6	NM_013443.4	1.48487	4.98101	0.0144593	0.290598
SRA1	NM_001253764.1	1.85093	2.81934	0.0144994	0.291252
NUCKS1	NM_022731.5	-1.13889	7.76287	0.0145083	0.291279
CDHR3	NM_152750.5	-7.45718	0.00534327	0.0145403	0.291744
ADAR	NM_015840.4	-1.5648	4.60667	0.0145466	0.291744
STOML2	NM_001287033.1	4.48594	1.16163	0.0145638	0.291801
RFX7	NM_001368073.2	-8.43536	0.887249	0.0145652	0.291801
DTNB	NM_001351389.2	-3.67339	1.52964	0.0145722	0.291801
SYNE1	NM_182961.4	-1.21757	6.40075	0.014586	0.291925
DUSP1	NM_004417.4	1.09789	6.03298	0.0146104	0.292261
ZNF445	NM_181489.6	-1.32711	4.67139	0.0146206	0.292313
MAGED2	NM_201222.3	1.03045	6.32496	0.0146305	0.292349
SMAD1	NM_001354814.1	-7.53884	0.0765177	0.0146376	0.292349
COMMD3	NM_012071.4	1.12281	4.84985	0.0146863	0.292724
DHRSX	NM_145177.3	1.13047	4.89228	0.0146984	0.292724
SAMD9L	NM_001350084.2	-8.47397	0.922651	0.014704	0.292724
MZT2B	NM_001330284.2	1.87282	2.59246	0.0147045	0.292724
CMPK2	NM_207315.3	-3.91779	2.17806	0.0147062	0.292724
SRI	NM_001256891.1	1.17365	4.76456	0.0147118	0.292724
AMBRA1	NM_001300731.2	1.95765	2.59924	0.0147135	0.292724
CYSTM1	NM_032412.4	1.43336	4.14024	0.0147362	0.292724
FURIN	NM_001289824.1	-8.26879	0.734178	0.0147602	0.292724
CD46	NM_172357.3	7.30802	-0.966143	0.0147614	0.292724
PFN2	NM_002628.5	1.00503	7.10797	0.0147642	0.292724
LIN54	NM_001288997.1	7.84786	-0.745393	0.0147769	0.292724
CAST	NM_001195573.1	7.84786	-0.745393	0.0147799	0.292724
DICER1	NM_001017396.3	7.84786	-0.745393	0.0147821	0.292724
USP47	NM_173060.4	7.84786	-0.745393	0.0147822	0.292724
ZNF2	NM_001372092.1	7.84787	-0.745393	0.0147844	0.292724
MED13	NM_005121.3	-1.21296	5.72883	0.014792	0.292724
UTRN	NM_007124.2	-1.12958	7.05378	0.0147948	0.292724
C1RL	NM_016546.4	-1.6906	5.35262	0.014801	0.292724
CALD1	NM_033139.3	-3.3389	1.95381	0.0148124	0.2928
RPGRIP1L	NM_001308334.2	-2.14103	3.00542	0.014825	0.292898
DUSP23	NM_001319658.2	2.314	2.1051	0.0148447	0.293001
VPS13D	NM_018156.4	-1.29468	5.90315	0.0148454	0.293001
MFSD3	NM_138431.3	1.25015	4.31133	0.0148683	0.293303
NECTIN3	NM_015480.3	-1.22586	6.82445	0.0149164	0.2941
SELENOS	NM_018445.6	1.00686	6.01265	0.0149308	0.294234
ERCC6L2	NM_020207.5	-1.6987	3.93087	0.0149418	0.294299
PCM1	NM_001352652.2	-3.39555	1.86233	0.0149799	0.294899
KLHL30	NM_198582.4	4.36536	0.0866181	0.0150153	0.295417
ZNF430	NM_001172671.2	-7.69897	0.2173	0.0150296	0.295417
FDPS	NM_002004.4	1.71211	3.30104	0.0150451	0.295417
AHCTF1	NM_001323342.2	-1.21716	5.21605	0.015049	0.295417
EFNA5	NM_001962.3	-2.10041	3.09773	0.0150508	0.295417
AIG1	NM_001286587.1	1.39366	3.83295	0.0150523	0.295417
B3GALT6	NM_080605.4	1.03559	5.90808	0.0150607	0.295431
BCL2L1	NM_138578.3	1.07464	5.30725	0.0150886	0.295828
LIN54	NM_001115007.3	-7.72483	0.241835	0.0151323	0.296517
HIGD2A	NM_138820.4	1.0239	5.68532	0.0151392	0.296517
LRIG3	NM_153377.4	-1.44792	4.95382	0.0151631	0.296834
SASH1	NM_001346505.2	-1.16063	6.09052	0.01518	0.297013
ODF2	NM_001242354.1	-8.32634	0.787424	0.0152041	0.297207
PRKAA1	NM_206907.3	-3.34714	2.4788	0.0152053	0.297207
PRR5	NM_181333.4	1.96255	3.37494	0.0152156	0.297256
PLA2G15	NM_012320.4	1.06394	5.53665	0.0152254	0.297256
IER3	NM_003897.4	1.32234	6.23452	0.015231	0.297256
GLIPR2	NM_001287013.1	-7.45039	-0.000702231	0.0152474	0.297425
SEMA3C	NM_001350121.1	-1.70054	4.08972	0.0152579	0.297479
RPS29	NM_001032.4	0.984732	6.78539	0.0152824	0.297749
PINK1	NM_032409.3	0.971821	7.26641	0.0152872	0.297749
PRKD3	NM_005813.5	-1.30621	5.28391	0.0153003	0.297852
ZNF658	NM_001317916.1	-7.45963	0.00743647	0.0153115	0.297921
NAA38	NM_001320924.2	2.03042	2.23951	0.0153248	0.297971
THRAP3	NM_005119.4	-1.15408	6.08664	0.0153296	0.297971
SLC66A2	NM_025078.5	1.28745	4.51031	0.0153425	0.298072
ST3GAL3	NM_174969.4	2.65464	1.37165	0.0153622	0.298216
MAP3K20	NM_133646.3	-1.0692	6.97646	0.0153655	0.298216
MRPS12	NM_033362.3	1.204	4.75165	0.0153741	0.298232
SH3GLB2	NM_001287046.1	2.98795	0.712588	0.0153856	0.298306
ZNF337	NM_001290261.1	-3.98954	1.94948	0.0153994	0.298422
MRPL11	NM_016050.5	1.1391	4.95575	0.015417	0.298613
BCL2L1	NM_001317919.2	1.12302	5.01301	0.015441	0.298746
ZNF429	NM_001346914.2	-7.70127	0.220229	0.015441	0.298746
RPL31	NM_000993.5	0.938618	7.92205	0.0154514	0.298746
TRAPPC2L	NM_001318525.2	1.20884	4.49905	0.0154612	0.298746
TSR3	NM_001001410.3	1.01641	6.30393	0.0154627	0.298746
MEA1	NM_001318942.1	1.08653	5.65411	0.015477	0.298872
TXNRD2	NM_006440.5	1.07592	5.10146	0.01551	0.299274
PRPF38B	NM_001349764.2	-7.46405	0.0111995	0.0155134	0.299274
GOLIM4	NM_014498.5	-1.1147	6.25871	0.0155237	0.299323
ZNF84	NM_001289971.2	-2.12823	3.4155	0.0155379	0.299407
SNRPB	NM_198216.2	1.3117	5.73016	0.0155497	0.299407
CRISPLD2	NM_031476.4	-1.17465	6.05273	0.0155514	0.299407
[truncated: 36,469 more rows]
