# Supplementary material for: A novel gene ZNF862 causes hereditary gingival fibromatosis
Source: eLife. 2022 Feb 10;11:e66646. doi: 10.7554/eLife.66646 (PMC8856651; doi:10.7554/eLife.66646)
Supplement: Supplementary file 2. [file elife-66646-supp2.xlsx]

## Sheet: Sheet1
Table S2. A list of the 100 most up-regulated DE genes and 100 most down-regulated DE genes.
Genes	Accession number	log2 FC	log2 CPM	P value	FDR	Expression
TBC1D14	NM_001286805.1	10.5209	1.86433	8.82121e-06	0.00297654	Up-regulated
MGAT5	NM_002410.5	10.1916	1.53583	2.77567e-05	0.00655042	Up-regulated
ASXL2	NM_001369346.1	10.0128	1.35773	4.9983e-05	0.00980968	Up-regulated
CACNA1C	NM_001129842.1	9.87311	1.21863	7.83343e-05	0.0135196	Up-regulated
TSC2	NM_001318832.1	9.76435	1.11044	0.000112631	0.0175408	Up-regulated
XRCC3	NM_001371229.1	9.74107	1.14512	5.0352e-07	0.000345873	Up-regulated
PUM2	NM_001352919.2	9.57121	0.918663	0.000200456	0.0257177	Up-regulated
SLC8A1	NM_001112802.2	9.49159	0.839704	0.000254403	0.0304863	Up-regulated
MICU1	NM_001363513.1	9.48606	0.922451	8.77266e-05	0.0146721	Up-regulated
MTMR1	NM_001353996.1	9.47039	0.907797	9.24438e-05	0.0151998	Up-regulated
PPP2R5C	NM_001352914.2	9.37813	0.72732	0.000364834	0.038116	Up-regulated
SULT1A4	NM_001017390.2	9.29128	0.700521	4.53476e-06	0.00193541	Up-regulated
DHX57	NM_001329963.1	9.28653	0.677092	5.79626e-06	0.00214389	Up-regulated
SLC12A8	NM_024628.5	9.27671	0.72757	0.000169477	0.0230363	Up-regulated
PI4KB	NM_001330721.2	9.25502	0.605592	0.000533134	0.0475825	Up-regulated
SNX14	NM_001297614.2	9.1752	0.612802	1.48455e-05	0.00439279	Up-regulated
CMIP	NM_030629.3	9.1204	0.472854	0.000775862	0.0589824	Up-regulated
CASP9	NM_032996.3	9.01765	0.384021	0.000111715	0.0174688	Up-regulated
LTBP4	NM_003573.2	9.01063	0.36481	0.00109658	0.0726028	Up-regulated
APAF1	NM_013229.3	9.01063	0.36481	0.00109626	0.0726028	Up-regulated
PRKAG2	NM_001304531.1	8.97207	0.326965	0.00123323	0.0761746	Up-regulated
KCNAB2	NM_001199860.2	8.97207	0.326965	0.00123288	0.0761746	Up-regulated
ERCC6	NM_001277059.1	8.97207	0.326965	0.00123217	0.0761746	Up-regulated
FAM107B	NM_001320740.1	8.93246	0.288127	0.00136958	0.0803107	Up-regulated
LRRC8D	NM_018103.5	8.93246	0.288127	0.00136889	0.0803107	Up-regulated
MRTFB	NM_001365413.2	8.93246	0.288127	0.00136881	0.0803107	Up-regulated
DNAJA4	NM_001130183.1	8.84977	0.207258	0.00166133	0.0900089	Up-regulated
ITGB5	NM_001354764.1	8.84977	0.207258	0.0016609	0.0900089	Up-regulated
NRF1	NM_001040110.1	8.80661	0.16511	0.00185667	0.0967759	Up-regulated
INSIG1	NM_198337.3	8.70671	0.13803	0.000100327	0.0162838	Up-regulated
RPS6KC1	NM_001349657.1	8.66877	0.0310076	0.00256936	0.117273	Up-regulated
EIF2B4	NM_172195.3	8.66644	0.0662726	0.000184111	0.0244958	Up-regulated
NT5C2	NM_001351184.1	8.61979	-0.0165055	0.00292207	0.127153	Up-regulated
TRIP12	NM_001348317.1	8.61979	-0.0165055	0.00291928	0.127153	Up-regulated
CSNK1G1	NM_001329606.2	8.61276	0.124336	0.0011139	0.0729269	Up-regulated
RPL17	NM_001369561.1	8.59837	0.0169025	0.000184672	0.0244958	Up-regulated
DAAM1	NM_014992.2	8.56912	-0.0655718	0.00335618	0.137636	Up-regulated
PBRM1	NM_001366070.2	8.56912	-0.0655718	0.00335513	0.137636	Up-regulated
ZNF142	NM_001366291.2	8.55891	-0.0397422	0.000307638	0.0346681	Up-regulated
STAT6	NM_001178080.2	8.51654	-0.116292	0.00378978	0.14622	Up-regulated
AMMECR1L	NM_031445.2	8.51654	-0.116292	0.00378857	0.14622	Up-regulated
OSBP2	NM_001282739.2	8.51654	-0.116292	0.00378775	0.14622	Up-regulated
AMOTL2	NM_001278683.1	8.46194	-0.168776	0.00421891	0.156498	Up-regulated
CYB5R3	NM_001171660.1	8.45565	-0.109578	0.000312364	0.0348281	Up-regulated
MTHFD1L	NM_001242768.1	8.43005	-0.0369393	0.00172111	0.0923374	Up-regulated
HDAC6	NM_001321225.2	8.41373	-0.0512366	0.00178742	0.0943163	Up-regulated
NRCAM	NM_001371177.1	8.40525	-0.223145	0.00480471	0.167716	Up-regulated
MGAT1	NM_001364386.2	8.40525	-0.223145	0.00480193	0.167716	Up-regulated
RGS14	NM_006480.5	8.40525	-0.223145	0.00479971	0.167716	Up-regulated
PPAN-P2RY11	NM_001040664.3	8.39716	-0.0656783	0.0018974	0.0978007	Up-regulated
ADNP	NM_001347511.2	8.36354	-0.0950066	0.00206902	0.1023	Up-regulated
ZKSCAN8	NM_001278122.2	8.34629	-0.279533	0.00552786	0.181792	Up-regulated
TCF7L2	NM_001198530.1	8.34628	-0.279533	0.00552253	0.181792	Up-regulated
IFI16	NM_001206567.2	8.31263	-0.245386	0.000523161	0.0469501	Up-regulated
ZDHHC4	NM_001371293.1	8.28479	-0.338087	0.00632644	0.197483	Up-regulated
PCID2	NM_001353092.2	8.28478	-0.338087	0.00632177	0.197483	Up-regulated
DMAC2	NM_001167867.2	8.25783	-0.186784	0.00254395	0.116637	Up-regulated
HSD3B7	NM_001142778.2	8.23944	-0.31859	0.000728223	0.0569897	Up-regulated
PIK3R3	NM_001328651.1	8.23883	-0.233267	0.000690456	0.0553329	Up-regulated
PLA2G6	NM_001349866.2	8.19154	-0.318797	0.000675818	0.0546149	Up-regulated
SPIDR	NM_001352959.1	8.17676	-0.356324	0.000773551	0.0589231	Up-regulated
PHTF1	NM_001323042.1	8.15339	-0.462359	0.00845915	0.227551	Up-regulated
GPATCH11	NM_001371862.1	8.15339	-0.462359	0.00845787	0.227551	Up-regulated
LIFR	NM_002310.6	8.15339	-0.462359	0.00845454	0.227551	Up-regulated
LYRM1	NM_001369635.1	8.15338	-0.462359	0.00844883	0.227551	Up-regulated
PDE3A	NM_001244683.1	8.1492	-0.439231	0.00168606	0.0908371	Up-regulated
ZNF532	NM_001353528.2	8.14354	-0.284864	0.00337926	0.137831	Up-regulated
VOPP1	NM_001321249.1	8.14354	-0.284864	0.0033796	0.137831	Up-regulated
NFASC	NM_015090.3	8.10335	-0.319114	0.00361755	0.143235	Up-regulated
DLG1	NM_001366219.1	8.08999	-0.37336	0.00100848	0.06915	Up-regulated
DTNB	NM_001351394.1	8.08877	-0.504481	0.00257724	0.117463	Up-regulated
PEX1	NM_001282677.2	8.08288	-0.528459	0.00990769	0.245251	Up-regulated
DMRTA2	NM_032110.3	8.08288	-0.528459	0.0099052	0.245251	Up-regulated
TTC26	NM_001321740.2	8.08288	-0.528459	0.00990343	0.245251	Up-regulated
CDK15	NM_139158.2	8.08288	-0.528459	0.00990314	0.245251	Up-regulated
ATP6V0E2	NM_001367795.1	8.08288	-0.528459	0.00989965	0.245251	Up-regulated
ZNF286A	NM_001288649.2	8.08288	-0.528459	0.00989857	0.245251	Up-regulated
KLF7	NM_001270944.1	8.08288	-0.528459	0.00989785	0.245251	Up-regulated
KIAA0895L	NM_001369685.1	7.99766	-0.542411	0.00160641	0.0881748	Up-regulated
SUGCT	NM_024728.2	7.93028	-0.464983	0.00523527	0.176378	Up-regulated
EIF6	NM_001267810.1	7.93028	-0.464983	0.00523627	0.176378	Up-regulated
RHOT2	NM_001352280.2	7.87325	-0.52499	0.00294261	0.127649	Up-regulated
CTBP2	NM_001321014.2	7.85964	-0.523777	0.00605344	0.192536	Up-regulated
DBNDD2	NM_001048224.2	7.70714	-0.649193	0.00781499	0.217392	Up-regulated
TFPI	NM_001329240.2	7.68007	-0.671214	0.0082013	0.224017	Up-regulated
TRAF1	NM_001190947.1	7.65247	-0.693582	0.00863284	0.228818	Up-regulated
ZNF41	NM_001324141.1	7.65247	-0.693582	0.00863857	0.228818	Up-regulated
RPS6KA1	NM_001330441.2	7.6346	-0.897171	0.00511076	0.173824	Up-regulated
EDA	NM_001005609.2	7.62436	-0.716308	0.00906324	0.234867	Up-regulated
NRXN3	NM_001272020.2	7.58231	-0.835298	0.00339951	0.137942	Up-regulated
FGD4	NM_001370297.1	7.57534	-0.871349	0.00371595	0.145858	Up-regulated
TOM1L2	NM_001350332.2	7.56645	-0.762879	0.00995798	0.245547	Up-regulated
PPFIBP2	NM_001256568.1	7.48504	1.03035	3.98467e-06	0.00182594	Up-regulated
ZNF75A	NM_001352495.1	7.42376	-1.07239	0.00759563	0.215834	Up-regulated
IL34	NM_152456.2	7.40099	0.984045	5.00593e-06	0.00200714	Up-regulated
POSTN	NM_001330517.2	7.327	-1.12246	0.00764176	0.216283	Up-regulated
ZNF875	NM_001329763.1	7.32243	-1.06457	0.0060624	0.19257	Up-regulated
CEP83	NM_001368038.1	7.31319	-1.11346	0.00701321	0.206886	Up-regulated
PAX3	NM_181457.4	7.28278	-1.04234	0.00673243	0.202801	Up-regulated
KIAA1841	NM_001330436.1	7.19719	-1.15279	0.00761398	0.215834	Up-regulated
PHACTR4	NM_001350158.2	-9.4036	1.80358	0.000190125	0.024876	Down-regulated
CDH13	NM_001220488.2	-9.41249	1.81205	0.000287108	0.0329677	Down-regulated
N4BP2	NM_001318359.2	-9.43599	1.83436	0.00226154	0.108608	Down-regulated
ARHGAP20	NM_020809.3	-9.44535	1.84359	0.000368386	0.038196	Down-regulated
MEIS3	NM_001346148.1	-9.44798	1.84626	7.93159e-05	0.0135602	Down-regulated
GRIA3	NM_000828.4	-9.44914	1.84753	0.00198065	0.0999867	Down-regulated
UBN1	NM_001288656.1	-9.45147	1.84962	6.52736e-05	0.0121299	Down-regulated
SEPTIN9	NM_001113491.2	-9.46168	1.85973	0.00169378	0.0911251	Down-regulated
ZNF219	NM_001102454.1	-9.47248	1.86983	6.87533e-05	0.0125343	Down-regulated
CEP162	NM_014895.4	-9.48296	1.87993	6.39844e-05	0.0120651	Down-regulated
AFF3	NM_001025108.2	-9.49153	1.88797	0.000602892	0.0508584	Down-regulated
ZNF655	NM_001085368.1	-9.49183	1.88806	0.00616265	0.195271	Down-regulated
ISG20L2	NM_001303095.1	-9.49414	1.89037	0.00180847	0.0949063	Down-regulated
NRDC	NM_002525.2	-9.52233	1.91774	0.00186727	0.0971963	Down-regulated
SZT2	NM_015284.4	-9.52491	1.92015	0.00139057	0.0808934	Down-regulated
JMJD1C	NM_001282948.1	-9.52751	1.92283	4.0525e-05	0.00851845	Down-regulated
PCDHGB3	NM_018924.5	-9.53134	1.92593	0.00414385	0.155514	Down-regulated
TPM1	NM_001365782.1	-9.54523	1.94007	0.00188829	0.0977617	Down-regulated
SGO2	NM_152524.6	-9.55666	1.95121	0.00038157	0.0391409	Down-regulated
FTO	NM_001363894.1	-9.61827	2.01041	5.29384e-05	0.010337	Down-regulated
TBL1XR1	NM_001321195.2	-9.62895	2.02073	0.000229049	0.0280599	Down-regulated
NUP98	NM_001365125.2	-9.64472	2.036	8.62801e-05	0.0145567	Down-regulated
EDNRB	NM_001122659.3	-9.6576	2.04835	0.000147959	0.0211355	Down-regulated
EHBP1	NM_001354219.2	-9.67429	2.06455	4.13449e-05	0.0086375	Down-regulated
HPS5	NM_181508.1	-9.6828	2.07279	3.45508e-05	0.00777232	Down-regulated
SULT1A3	NM_177552.3	-9.68639	2.07627	9.39261e-06	0.0031411	Down-regulated
TASOR2	NM_001321784.1	-9.71013	2.09932	0.00111105	0.0729269	Down-regulated
TNFSF13B	NM_006573.4	-9.71124	2.10008	0.000538753	0.047816	Down-regulated
TLR4	NM_138554.5	-9.71791	2.10651	0.0010318	0.0698972	Down-regulated
OGA	NM_001142434.1	-9.7427	2.13077	8.71908e-06	0.00296811	Down-regulated
FAM111A	NM_198847.3	-9.75628	2.14431	0.00218178	0.106236	Down-regulated
WNT16	NM_057168.2	-9.77425	2.16147	0.000481607	0.0446409	Down-regulated
CPEB4	NM_030627.4	-9.77829	2.16524	5.9184e-06	0.00216822	Down-regulated
DYRK1A	NM_001396.4	-9.80833	2.1944	6.39969e-06	0.0022585	Down-regulated
NPR3	NM_001204376.1	-9.82348	2.2091	0.000759786	0.0586852	Down-regulated
NFATC4	NM_001288802.2	-9.82727	2.21229	0.00224229	0.108088	Down-regulated
NRP1	NM_001024629.2	-9.83298	2.21829	2.29458e-05	0.005769	Down-regulated
PRKAR1A	NM_001276289.1	-9.83363	2.2189	1.12918e-05	0.00368104	Down-regulated
CDC25B	NM_001287519.1	-9.87179	2.25559	0.0090259	0.234867	Down-regulated
YAP1	NM_001282099.1	-9.88673	2.27036	0.000623553	0.0518061	Down-regulated
WASHC2C	NM_001169106.2	-9.88716	2.27076	0.000609676	0.0510946	Down-regulated
KAT6B	NM_001370138.1	-9.9247	2.30738	1.77475e-05	0.0049479	Down-regulated
SUN1	NM_001367677.1	-9.92863	2.31085	0.000477543	0.0444785	Down-regulated
STAG2	NM_001042751.2	-9.94126	2.32346	1.47696e-05	0.00439279	Down-regulated
NR3C1	NM_001364181.2	-9.95828	2.33997	7.1e-05	0.0127624	Down-regulated
CHD9	NM_001352156.2	-9.98553	2.36659	3.93042e-06	0.00182594	Down-regulated
NFKB1	NM_001319226.2	-10.0022	2.38276	2.861e-06	0.00141095	Down-regulated
TAB2	NM_015093.5	-10.0202	2.40025	7.01058e-06	0.00242951	Down-regulated
RASL12	NM_016563.4	-10.0403	2.41957	0.000417699	0.041626	Down-regulated
UBP1	NM_001128161.1	-10.0418	2.42128	9.30189e-07	0.000542145	Down-regulated
ADGRL1	NM_014921.5	-10.0577	2.4368	1.43209e-05	0.00435582	Down-regulated
DGKH	NM_001204504.2	-10.061	2.44002	0.000752744	0.0582612	Down-regulated
USP53	NM_001371395.1	-10.0691	2.44796	9.47221e-06	0.0031411	Down-regulated
TSPAN11	NM_001370302.1	-10.0821	2.46009	0.00835423	0.226499	Down-regulated
HDAC7	NM_015401.5	-10.0955	2.47352	0.0099657	0.24558	Down-regulated
ULK3	NM_001099436.4	-10.1239	2.5014	1.1588e-06	0.000642705	Down-regulated
IQCE	NM_001287501.1	-10.1253	2.50278	4.54236e-06	0.00193541	Down-regulated
ADH1B	NM_000668.6	-10.1696	2.54549	0.00642684	0.198677	Down-regulated
ZDBF2	NM_001285549.2	-10.1756	2.55189	6.11934e-07	0.000392321	Down-regulated
ARHGAP19	NM_032900.6	-10.1772	2.55334	5.72615e-06	0.00214389	Down-regulated
PHACTR1	NM_001322314.2	-10.1827	2.55877	1.66638e-05	0.00474821	Down-regulated
KYNU	NM_001199241.2	-10.2045	2.58002	0.000346271	0.036979	Down-regulated
ZNF587	NM_001204817.2	-10.2065	2.58198	2.38253e-06	0.00121656	Down-regulated
WTAP	NM_004906.5	-10.2194	2.59462	3.62975e-07	0.000253865	Down-regulated
ICE2	NM_001018089.3	-10.2327	2.60764	6.33402e-07	0.000399427	Down-regulated
CDK6	NM_001259.8	-10.2453	2.61992	2.88436e-07	0.000221906	Down-regulated
RREB1	NM_001168344.2	-10.3423	2.71473	0.000228718	0.0280599	Down-regulated
GOLGB1	NM_001256488.1	-10.3481	2.7202	0.00572886	0.185811	Down-regulated
VPS13A	NM_001018037.2	-10.3604	2.73248	9.67838e-08	8.6581e-05	Down-regulated
GRAMD1B	NM_001330396.2	-10.4094	2.78055	1.63153e-05	0.004726	Down-regulated
ANKRD28	NM_001195098.1	-10.4617	2.83174	0.000187192	0.02466	Down-regulated
GSTT1	NM_000853.3	-10.4737	2.84342	0.000187985	0.0246799	Down-regulated
GSTM1	NM_000561.4	-10.5214	2.89004	0.0048768	0.169031	Down-regulated
NFIX	NM_001365983.2	-10.6911	3.05694	0.00017225	0.0231883	Down-regulated
FAM20B	NM_001324310.1	-10.7439	3.10877	0.000248031	0.0300031	Down-regulated
SYNE2	NM_182914.2	-10.82	3.18387	1.61927e-08	1.88753e-05	Down-regulated
HDGF	NM_001319187.1	-10.8528	3.21605	2.8819e-09	5.03899e-06	Down-regulated
GSE1	NM_001278184.3	-10.8542	3.2175	1.43886e-09	2.91309e-06	Down-regulated
CTSA	NM_001127695.2	-10.8565	3.21972	0.00373884	0.145911	Down-regulated
TBC1D5	NM_001349080.1	-10.8813	3.24423	1.35147e-09	2.88816e-06	Down-regulated
PEX2	NM_000318.3	-10.9033	3.26596	2.98384e-10	8.19852e-07	Down-regulated
TGFBR3	NM_001195683.2	-10.9053	3.26786	3.18692e-07	0.000231304	Down-regulated
FHL1	NM_001167819.1	-10.918	3.28045	3.83265e-09	5.64877e-06	Down-regulated
TRPS1	NM_014112.5	-10.9216	3.28396	9.87931e-07	0.000567205	Down-regulated
GOLGA8A	NM_001368071.2	-10.9287	3.29101	3.48013e-09	5.59483e-06	Down-regulated
ANKRD12	NM_015208.5	-10.9729	3.33457	4.14788e-10	1.06371e-06	Down-regulated
SSH2	NM_033389.3	-10.9782	3.33978	6.87128e-10	1.55481e-06	Down-regulated
SLX1A	NM_001014999.2	-10.9836	3.34498	3.96488e-09	5.64877e-06	Down-regulated
ATP1A1	NM_001160234.1	-11.0823	3.44267	0.00298815	0.129007	Down-regulated
GIGYF2	NM_015575.4	-11.1536	3.51278	1.30924e-10	4.19689e-07	Down-regulated
SMARCA4	NM_001128846.1	-11.262	3.61983	2.54918e-10	7.54303e-07	Down-regulated
NFAT5	NM_138714.4	-11.2878	3.6455	5.11934e-08	5.62645e-05	Down-regulated
JAK1	NM_001321856.1	-11.4922	3.8477	4.05472e-13	2.22818e-09	Down-regulated
PLD3	NM_001291311.1	-11.6047	3.95907	1.61506e-12	7.76581e-09	Down-regulated
NSD1	NM_172349.2	-11.6673	4.02109	0.00220289	0.106858	Down-regulated
LGALS8	NM_201544.3	-11.7012	4.05489	2.237e-13	1.61417e-09	Down-regulated
ADGRL2	NM_012302.4	-11.7095	4.06308	3.69351e-05	0.00809964	Down-regulated
SCRN1	NM_001145514.1	-11.7392	4.09254	2.91e-15	3.7313e-11	Down-regulated
PAM	NM_000919.3	-12.3258	4.67522	2.42435e-11	1.03619e-07	Down-regulated
NBPF10	NM_001039703.6	-12.8066	5.15378	7.6591e-19	2.94623e-14	Down-regulated
