# Supplementary figures and images for: A novel gene ZNF862 causes hereditary gingival fibromatosis
Source: eLife journal article supplement (doi:10.7554/elife.66646), 2022-02-10

**A**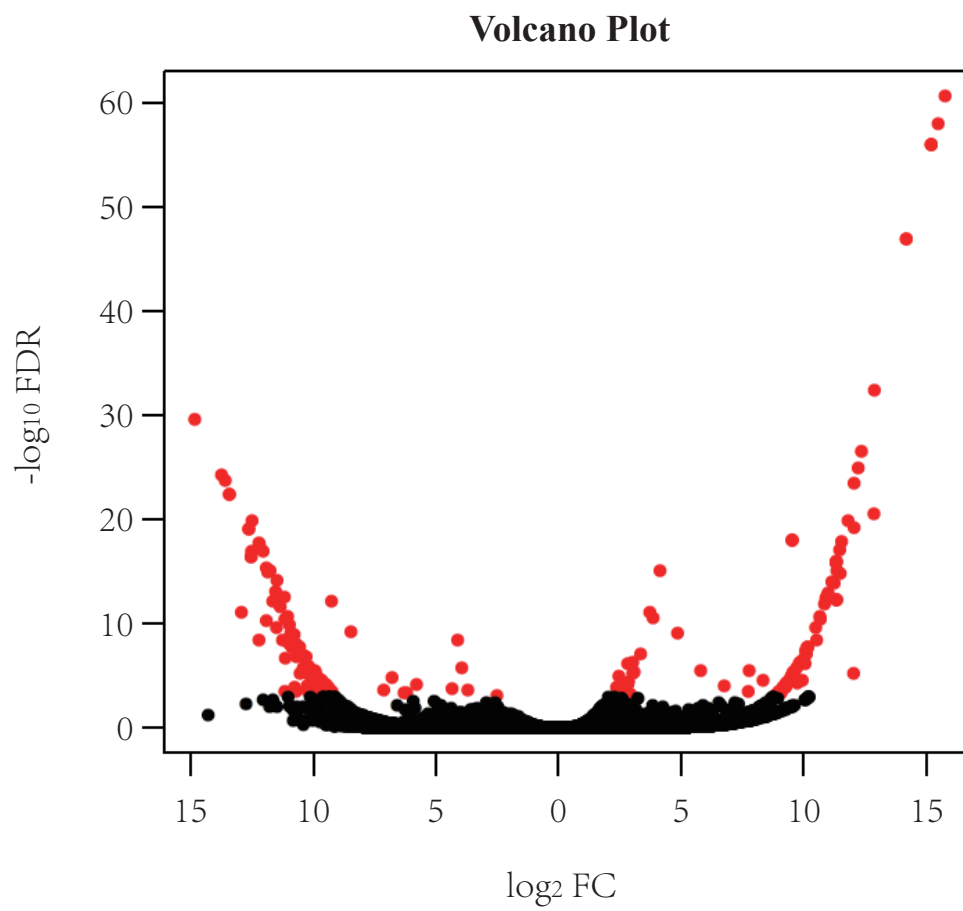**B**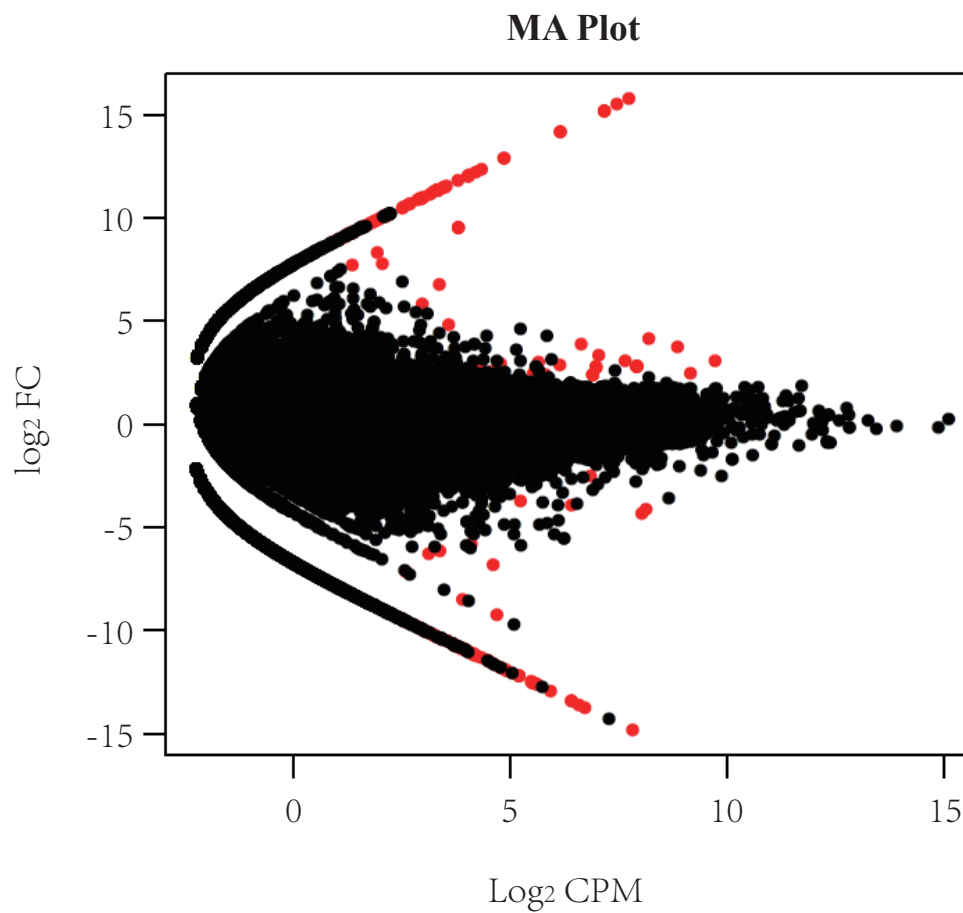

Supplement: supp [file elife-66646-supp-v1.zip]

*SOS1*

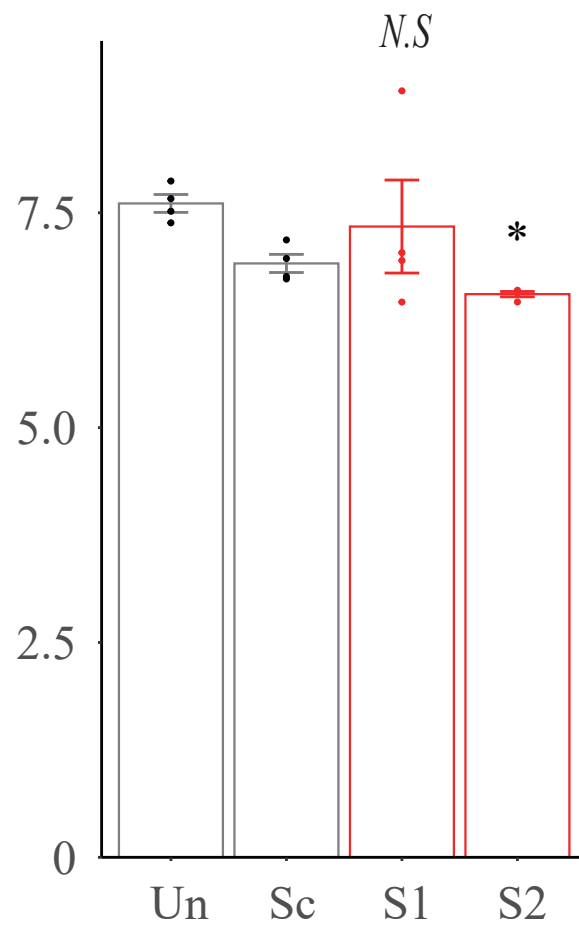

Supplement: supp [file elife-66646-supp-v1.zip]
